# Supplementary material for: Ba, Sr, and Rb feldspar/melt partitioning in recent eruptions from Teide-Pico Viejo volcanic complex, Tenerife: New insights into pre-eruptive processes
Source: Frontiers journal article supplement (doi:10.3389/feart.2023.1155724), 2023-03-28
Supplement: Data_Sheet_1.xlsx [file Data_Sheet_1.xlsx]

## Sheet: Whole rock and glass
Sample	IGSN	Spot	Type	Eruption	Geological Unit*	Method	SiO2	TiO2	Al2O3	Fe2O3	FeO	MnO	MgO	CaO	Na2O	K2O	P2O5	BaO	SrO	Cl	Sum	LOI_(%)	SiO2_N	TiO2_N	Al2O3_N	FeOt_N	MnO_N	MgO_N	CaO_N	Na2O_N	K2O_N	P2O5_N	Cl_N	Total	total_alkali	Cl_ppm	Ni_ppm	Cr_ppm	V_ppm	Ga_ppm	Cu_ppm	Zn_ppm	La_ppm	Ce_ppm	Pr_ppm	Nd_ppm	Sm_ppm	Eu_ppm	Gd_ppm
ODG-4A	10.58052/IEODG000B		whole rock	Montaña Rajada	lmb	XRF/ICP-MS	58.7752	0.632752	19.2809		3.49469	0.201789	0.329476	0.708769	9.81499	5.5902	0.068404			0.488432	98.8971	0.536265	59.4306	0.639808	19.4959	3.53366	0.20404	0.33315	0.716673	9.92445	5.65254	0.0691668		100	15.577		0	0	6.9678	31.1738	0	129.079	122.476	204.595	19.9882	61.3777	9.88323	1.69904	7.43324
ODG-13A	10.58052/IEODG000K		whole rock	Lavas Negras	TL	XRF/ICP-MS	59.5544	0.779967	19.2087		3.484	0.175487	0.533969	1.17763	9.03422	5.24968	0.131103			0.324065	99.3291	0.227015	59.9566	0.785235	19.3384	3.50753	0.176672	0.537575	1.18558	9.09524	5.28514	0.131989		100	14.3804		0	0	14.8834	26.3684	0	108.009	103.499	173.357	17.0319	53.4245	8.55292	1.99809	6.42643
ODG-18A	10.58052/IEODG000P		whole rock	Pico Viejo H	PVH	XRF/ICP-MS	51.2375	2.23351	18.3722		7.87242	0.17892	2.74077	5.85805	6.68703	3.22579	0.909342			0.125244	99.3155	0.10506	51.5906	2.24891	18.4988	7.92668	0.180153	2.75966	5.89842	6.73312	3.24803	0.915609		100	9.98114		7.05726	0	114.415	26.2738	18.5808	115.953	104.931	188.021	20.8654	74.8464	13.1919	3.89378	10.5127
ODG-20B	10.58052/IEODG000S		whole rock	Montaña Reventada	revla	XRF/ICP-MS	59.4528	1.1338	18.9051		4.34575	0.162205	1.08068	2.0448	7.74457	4.76625	0.279972			0.076725	99.9159	-0.195727	59.5028	1.13475	18.921	4.34941	0.162342	1.08159	2.04652	7.75109	4.77026	0.280208		100	12.5213		0	0	37.6695	24.9084	0	98.392	86.9585	147.929	15.129	49.7663	8.19668	2.5719	6.20682
ODG-37A	10.58052/IEODG001B		whole rock	Arenas Blancas	ab	XRF/ICP-MS	59.0557	0.766872	19.2602		3.21466	0.181162	0.453083	0.831413	9.2157	5.45995	0.0960375			0.39117	98.5348	0.90526	59.9338	0.778276	19.5466	3.26246	0.183856	0.45982	0.843776	9.35274	5.54114	0.0974656		100	14.8939		0	0	15.3465	28.3238	0	111.909	112.53	188.529	18.4204	56.8448	8.89497	1.92336	6.79113
ODG-39A	10.58052/IEODG001D		whole rock	Teide J2	TJ2	XRF/ICP-MS	58.7387	0.694601	19.4167		3.50068	0.194198	0.407484	0.774204	9.59391	5.56529	0.085946			0.440216	98.9717	0.735639	59.3489	0.701818	19.6185	3.53705	0.196216	0.411718	0.782248	9.69358	5.62311	0.086839		100	15.3167		0	0	9.9176	29.9292	0	121.042	119.413	200.106	19.3889	59.6439	9.6684	1.80983	7.32595
ODG-41A	10.58052/IEODG001F		whole rock	Pico Viejo C	PVC	XRF/ICP-MS	48.5954	2.97744	18.0714		9.42293	0.186319	3.77437	7.98619	5.34629	2.56375	1.04733			0	99.9714	-0.332594	48.6093	2.97829	18.0766	9.42563	0.186372	3.77545	7.98848	5.34782	2.56448	1.04763		100	7.9123		27.4125	0	176.949	23.7062	25.1076	117.388	82.8991	158.269	18.3557	69.1488	12.6824	3.9766	10.8214
ODG-4A	10.58052/IEODG000B	ODG4A-1-glass	glass	Montaña Rajada	lmb	EMPA	65.1311	0.619568	20.7344		3.56967	0.211924	0.335187	0.640344	10.2523	5.29637				0.395742	107.187		60.7642	0.578027	19.3442	3.33033	0.197715	0.312714	0.59741	9.56491	4.94126	0	0.369208	100	14.5062
ODG-4A	10.58052/IEODG000B	ODG4A-2-glass	glass	Montaña Rajada	lmb	EMPA	65.8499	0.594819	20.68		3.39184	0.206727	0.379865	0.615068	10.0941	5.30942				0.368973	107.491		61.261	0.553368	19.2389	3.15547	0.192321	0.353393	0.572206	9.39067	4.93942	0	0.34326	100	14.3301
ODG-4A	10.58052/IEODG000B	ODG4A-5-bt	glass	Montaña Rajada	lmb	EMPA	63.7798	0.733264	20.3567		3.52127	0.191514	0.665081	0.413014	9.30114	5.63354				0.373108	104.968		60.7609	0.698557	19.3932	3.3546	0.182449	0.633601	0.393465	8.86089	5.36689	0	0.355448	100	14.2278
ODG-13A	10.58052/IEODG000K	ODG13A-5-glass	glass	Lavas Negras	TL	EMPA	60.5856	0.846981	19.6694		4.06583	0.20025	0.706815	0.789435	9.69807	5.9154				0.378903	102.857		58.9029	0.823457	19.1231	3.95291	0.194688	0.687184	0.76751	9.42872	5.75111	0	0.36838	100	15.1798
ODG-13A	10.58052/IEODG000K	ODG13A-5-glass	glass	Lavas Negras	TL	EMPA	60.3372	0.856842	19.6136		4.10187	0.192897	0.657635	0.864682	9.34223	5.91181				0.37053	102.249		59.0099	0.837993	19.1821	4.01164	0.188654	0.643168	0.845661	9.13672	5.78176	0	0.362379	100	14.9185
ODG-13A	10.58052/IEODG000K	ODG13A-5-glass	glass	Lavas Negras	TL	EMPA	60.4778	0.867463	19.8735		4.40797	0.230662	0.661926	0.592526	10.4139	5.69679				0.423855	103.646		58.3501	0.836945	19.1743	4.25289	0.222547	0.638639	0.57168	10.0475	5.49637	0	0.408943	100	15.5439
ODG-13A	10.58052/IEODG000K	ODG13A-9-glass	glass	Lavas Negras	TL	EMPA	59.9824	0.906274	19.8738		4.37062	0.2543	0.676405	0.935908	9.49953	5.91811				0.418309	102.836		58.3284	0.881284	19.3258	4.2501	0.247288	0.657753	0.910101	9.23758	5.75492	0	0.406774	100	14.9925
ODG-13A	10.58052/IEODG000K	ODG13A-9-glass	glass	Lavas Negras	TL	EMPA	60.7857	0.906467	19.831		4.27643	0.241774	0.720612	0.797773	9.68274	5.96108				0.435219	103.639		58.6515	0.874641	19.1347	4.12628	0.233285	0.695311	0.769763	9.34278	5.75178	0	0.419938	100	15.0946
ODG-37A	10.58052/IEODG001B	ODG37A-7-bt	glass	Arenas Blancas	ab	EMPA	63.8994	0.733787	20.4496		3.57775	0.234245	0.448688	0.544895	9.825	5.25925				0.426857	105.399		60.6259	0.696196	19.402	3.39447	0.222245	0.425702	0.516981	9.32168	4.98983	0	0.40499	100	14.3115
ODG-37A	10.58052/IEODG001B	ODG37A-11-glass	glass	Arenas Blancas	ab	EMPA	64.4939	0.708383	20.5811		3.05009	0.163181	0.39379	0.732646	9.97088	5.25998				0.334617	105.689		61.0226	0.670255	19.4733	2.88592	0.154398	0.372595	0.693212	9.43421	4.97687	0	0.316607	100	14.4111
ODG-37A	10.58052/IEODG001B	ODG37A-11-glass	glass	Arenas Blancas	ab	EMPA	64.5535	0.67118	20.4406		3.22429	0.202368	0.42203	0.648508	9.55236	5.19607				0.332314	105.243		61.3374	0.637742	19.4222	3.06366	0.192286	0.401004	0.616199	9.07646	4.9372	0	0.315758	100	14.0137
ODG-37A	10.58052/IEODG001B	ODG37A-11-glass	glass	Arenas Blancas	ab	EMPA	64.5613	0.70471	20.675		3.09767	0.185581	0.480278	0.535894	9.63785	5.20345				0.349323	105.431		61.2356	0.668408	19.61	2.9381	0.176021	0.455538	0.508289	9.14138	4.93541	0	0.331328	100	14.0768
ODG-37A	10.58052/IEODG001B	ODG37A-11-glass	glass	Arenas Blancas	ab	EMPA	63.9188	0.732267	20.5685		3.23255	0.165949	0.39609	0.66513	9.55547	5.20045				0.343017	104.778		61.0039	0.698873	19.6305	3.08514	0.158381	0.378027	0.634798	9.11971	4.96329	0	0.327374	100	14.083
ODG-39A	10.58052/IEODG001D	ODG39A-6-glass	glass	Teide J2	TJ2	EMPA	64.9303	0.672348	20.4227		3.48708	0.198887	0.436146	0.588491	9.82709	5.4355				0.326355	106.325		61.0678	0.632352	19.2078	3.27965	0.187056	0.410201	0.553484	9.24251	5.11216	0	0.306941	100	14.3547
ODG-4A	10.58052/IEODG000B	ODG4A_1_glass_1	glass	Montaña Rajada	lmb	LA-ICP-MS	65.4082	0.686564			2.63607	0.221721	0.333514	0.770807	10.2275	5.93694	0.0842506	0.000509324	8.60048e-05																	3453.83	0.0480665	0.221767			1.54093		137.855	236.883	22.1518	73.3071	11.0857	1.64183	9.52666
ODG-4A	10.58052/IEODG000B	ODG4A_1_glass_2	glass	Montaña Rajada	lmb	LA-ICP-MS	65.4082	0.659797			2.46921	0.205377	0.315102	0.680546	9.92072	5.8156	0.0828792	0.000536379	0.00395709																	4498.61	0.0618725	1.2511			1.11887		132.984	220.261	21.3733	69.5322	10.3993	1.75113	8.83303
ODG-4A	10.58052/IEODG000B	ODG4A_2_glass_1	glass	Montaña Rajada	lmb	LA-ICP-MS	65.4082	0.657584			2.46191	0.202801	0.308133	0.62995	10.0387	5.59475	0.0810245	0.000574082	0.000138269																	2815.51	0.076617	0.464353			0.476413		119.138	211.913	19.4513	60.1997	9.26007	1.51465	8.40724
ODG-4A	10.58052/IEODG000B	ODG4A_2_glass_2	glass	Montaña Rajada	lmb	LA-ICP-MS	65.4082	0.668085			2.52561	0.205448	0.298779	0.711001	10.1145	5.51088	0.0827073	0.00094396	0.000241445																	3465.11	0	0			0.453189		123.274	218.437	19.9162	63.0412	9.5912	1.53973	8.56068
ODG-37A	10.58052/IEODG001B	ODG37A_7_glass_1	glass	Arenas Blancas	ab	LA-ICP-MS	64.5082	0.810271			2.33074	0.188118	0.371505	0.669336	10.0701	5.72297	0.0986257	0.0101843	0.000432672																	2118.26	0.061345	2.64038			0.798345		114.024	207.56	18.8646	57.6367	8.87452	1.82321	7.21723
ODG-37A	10.58052/IEODG001B	ODG37A_7_glass_2	glass	Arenas Blancas	ab	LA-ICP-MS	64.5082	0.805362			2.31348	0.190131	0.387573	0.688135	10.2191	5.72325	0.0909064	0.0119908	0.000392																	2101.74	0.0901302	1.3487			0.482445		118.537	214.763	19.3886	59.4921	9.26297	1.90544	7.15817
ODG-37A	10.58052/IEODG001B	ODG37A_7_glass_3	glass	Arenas Blancas	ab	LA-ICP-MS	64.5082	0.798842			2.31791	0.190705	0.385353	0.772556	10.1119	5.56492	0.0926563	0.0139123	0.000498296																	2050.63	0.161776	1.62391			0.521841		118.604	214.363	19.1367	59.472	9.17952	1.80905	7.36814
ODG-37A	10.58052/IEODG001B	ODG37A_11_glass_1	glass	Arenas Blancas	ab	LA-ICP-MS	64.5082	0.789044			2.3301	0.181467	0.364312	0.78449	10.1598	5.5525	0.0923623	0.0212891	0.00103862																	2013.46	0.253069	7.44297			3.0986		114.55	205.49	18.805	57.9771	9.01915	1.88463	7.03839
ODG-37A	10.58052/IEODG001B	ODG37A_11_glass_3	glass	Arenas Blancas	ab	LA-ICP-MS	64.5082	0.852141			2.4699	0.190341	0.378319	0.791226	10.2716	5.67375	0.111034	0.0148911	0.000775256																	2222.01	0.453227	7.72704			3.2922		118.57	211.126	19.5355	61.0106	9.19498	1.80811	7.52789
ODG-39A	10.58052/IEODG001D	ODG39A_4_glass_1	glass	Teide J2	TJ2	LA-ICP-MS	64.7883	0.799172			3.0677	0.207051	0.363275	0.704378	10.559	5.71357	0.0993091	0.00476224	0.000172739																	646.219	0.109635	0.698562			0.804831		103.985	207.109	17.9457	52.9895	8.61378	1.58002	6.65132
ODG-39A	10.58052/IEODG001D	ODG39A_4_glass_2	glass	Teide J2	TJ2	LA-ICP-MS	64.7883	0.820999			3.16022	0.2113	0.371283	0.586135	10.6402	5.91207	0.0916964	0.00290861	8.40991e-05																	513.47	0.386784	1.94825			0.700589		102.781	210.141	18.4737	54.4142	8.02629	1.52656	7.03527
ODG-39A	10.58052/IEODG001D	ODG39A_6_glass_2	glass	Teide J2	TJ2	LA-ICP-MS	64.9083	0.874661			3.43034	0.227799	0.407253	0.785303	10.7206	5.82596	0.108016	0.00381381	0.000303832																	786.234	0.560716	1.43139			1.01946		155.546	249.97	24.9408	81.1192	12.7476	2.08783	10.6153
ODG-13A	10.58052/IEODG000K	ODG13A_5_glass_1	glass	Lavas Negras	TL	LA-ICP-MS	60.4076	1.00609			3.70465	0.235859	0.592658	0.87691	10.2818	5.92802	0.150014	0.00241178	0.000354371																	700.584	0.263945	3.56993			1.21201		132.924	247.342	23.2198	72.0278	11.796	1.7493	8.79698
ODG-13A	10.58052/IEODG000K	ODG13A_5_glass_2	glass	Lavas Negras	TL	LA-ICP-MS	60.4076	1.0422			3.92071	0.251281	0.627539	0.820823	10.5537	5.83259	0.157794	0.0013425	0.000342535																	821.706	0.302236	5.56107			4.67987		142.046	261.505	24.7454	77.361	12.7342	1.61125	9.48626
ODG-13A	10.58052/IEODG000K	ODG13A_8_glass_1	glass	Lavas Negras	TL	LA-ICP-MS	60.4076	1.10366			4.14603	0.267306	0.65942	0.989884	10.6286	5.89526	0.159958	0.00111431	0.000305793																	923.175	0.156689	4.295			2.8606		151.531	276.463	26.5503	81.9922	13.1312	1.81708	9.97996
ODG-13A	10.58052/IEODG000K	ODG13A_6_glass_1	glass	Lavas Negras	TL	LA-ICP-MS	60.4076	1.01464			3.65022	0.230039	0.571553	0.936487	10.6539	6.0502	0.15272	0.00615298	0.000932602																	296.09	0.181901	1.33752			1.25157		154.332	249.207	24.8235	79.5699	12.9618	1.86406	10.5687
*Geological units after Ablay & Martí, 2000
[truncated: 29 more columns]

## Sheet: Feldspars
Sample	IGSN	Spot	Type	Eruption	Geological Unit*	Method	SiO2	Al2O3	MgO	CaO	FeO	SrO	BaO	Na2O	K2O	P2O5	MnO	TiO2	Sum	SiO2_N	Al2O3_N	MgO_N	CaO_N	FeO_N	SrO_N	BaO_N	Na2O_N	K2O_N	P2O5_N	MnO_N	TiO2_N	Sum_N	Cl_ppm	Ni_ppm	Cr_ppm	Cu_ppm	La_ppm	Ce_ppm	Pr_ppm	Nd_ppm	Sm_ppm	Eu_ppm	Gd_ppm	Tb_ppm	Dy_ppm	Ho_ppm	Er_ppm	Tm_ppm	Yb_ppm
ODG-4A	10.58052/IEODG000B	902	core	Montaña Blanca	lmb	EMPA	66.0184	19.3734	0	0.49679	0.224516	0	0.019207	7.38377	6.07022	0	0	0.055317	99.6416	66.2558	19.4431	0	0.498577	0.225324	0	0.0192761	7.41033	6.09205	0	0	0.055516	100
ODG-4A	10.58052/IEODG000B	903	core	Montaña Blanca	lmb	EMPA	66.3901	19.388	0	0.49337	0.207529	0	0.028014	7.38735	5.98587	0	0	0.055353	99.9356	66.4329	19.4005	0	0.493688	0.207663	0	0.0280321	7.39211	5.98973	0	0	0.0553887	100
ODG-4A	10.58052/IEODG000B	904	core	Montaña Blanca	lmb	EMPA	66.2595	19.4975	0	0.554403	0.23127	0.035726	0.018164	7.35017	5.96191	0	0	0.060492	99.9691	66.28	19.5035	0	0.554574	0.231341	0.035737	0.0181696	7.35244	5.96375	0	0	0.0605107	100
ODG-4A	10.58052/IEODG000B	905	outer rim	Montaña Blanca	lmb	EMPA	66.0678	19.2166	0	0.444328	0.237055	0	0.015685	7.07927	6.44467	0	0	0.060044	99.5655	66.3561	19.3005	0	0.446267	0.23809	0	0.0157535	7.11017	6.4728	0	0	0.0603061	100
ODG-4A	10.58052/IEODG000B	906	core	Montaña Blanca	lmb	EMPA	65.9551	19.385	0	0.484972	0.260912	0	0	7.16437	6.24321	0	0	0.080849	99.5744	66.237	19.4679	0	0.487045	0.262027	0	0	7.19499	6.26989	0	0	0.0811946	100
ODG-4A	10.58052/IEODG000B	907	core	Montaña Blanca	lmb	EMPA	65.9682	19.5254	0	0.56512	0.220322	0	0.023935	7.35771	5.96972	0	0	0.063315	99.6937	66.1709	19.5854	0	0.566856	0.220999	0	0.0240085	7.38031	5.98806	0	0	0.0635095	100
ODG-4A	10.58052/IEODG000B	908	outer rim	Montaña Blanca	lmb	EMPA	65.3274	20.0328	0	1.10969	0.334976	0	0.015288	7.68283	5.02322	0	0	0.080153	99.6064	65.5856	20.112	0	1.11408	0.3363	0	0.0153484	7.71319	5.04307	0	0	0.0804698	100
ODG-4A	10.58052/IEODG000B	909	core	Montaña Blanca	lmb	EMPA	65.8695	19.1746	0	0.382678	0.210153	0.020658	0.026747	7.189	6.43415	0	0	0.057361	99.3648	66.2905	19.2972	0	0.385124	0.211496	0.02079	0.026918	7.23495	6.47528	0	0	0.0577277	100
ODG-4A	10.58052/IEODG000B	910	core	Montaña Blanca	lmb	EMPA	66.1146	19.2197	0	0.344037	0.221043	0	0.029668	7.02656	6.6557	0	0	0.063891	99.6752	66.33	19.2823	0	0.345158	0.221763	0	0.0297647	7.04946	6.67739	0	0	0.0640992	100
ODG-4A	10.58052/IEODG000B	911	core	Montaña Blanca	lmb	EMPA	66.4339	19.2835	0	0.369171	0.204334	0	0	7.10679	6.41191	0	0	0.05091	99.8605	66.5267	19.3104	0	0.369687	0.204619	0	0	7.11672	6.42087	0	0	0.0509811	100
ODG-4A	10.58052/IEODG000B	912	outer rim	Montaña Blanca	lmb	EMPA	66.3273	19.1637	0	0.34535	0.233026	0	0.014025	6.98727	6.60968	0	0	0.059596	99.7399	66.5002	19.2137	0	0.34625	0.233634	0	0.0140616	7.00549	6.62691	0	0	0.0597514	100
ODG-4A	10.58052/IEODG000B	913	feld micro	Montaña Blanca	lmb	EMPA	66.0867	19.4127	0	0.470533	0.238184	0	0.014326	7.34489	6.21373	0	0	0.053681	99.8347	66.1961	19.4448	0	0.471312	0.238578	0	0.0143497	7.35705	6.22402	0	0	0.0537699	100
ODG-4A	10.58052/IEODG000B	914	microlite	Montaña Blanca	lmb	EMPA	65.916	19.4673	0	0.575146	0.353797	0	0	7.52327	5.64765	0	0	0.085299	99.5685	66.2017	19.5517	0	0.577639	0.35533	0	0	7.55588	5.67213	0	0	0.0856687	100
ODG-4A	10.58052/IEODG000B	915	core	Montaña Blanca	lmb	EMPA	66.2803	19.5786	0	0.733795	0.237091	0	0	7.95919	4.88788	0	0	0.055049	99.7319	66.4585	19.6312	0	0.735768	0.237728	0	0	7.98059	4.90102	0	0	0.055197	100
ODG-4A	10.58052/IEODG000B	916	core	Montaña Blanca	lmb	EMPA	65.955	19.5563	0	0.690322	0.238967	0	0.021933	7.66598	5.13771	0	0	0.059743	99.326	66.4026	19.689	0	0.695007	0.240589	0	0.0220818	7.718	5.17258	0	0	0.0601484	100
ODG-4A	10.58052/IEODG000B	917	core	Montaña Blanca	lmb	EMPA	66.3417	19.2086	0	0.333067	0.31336	0	0.026671	7.06762	6.70351	0	0	0.065021	100.06	66.3022	19.1972	0	0.332869	0.313174	0	0.0266551	7.06341	6.69952	0	0	0.0649823	100
ODG-4A	10.58052/IEODG000B	918	core	Montaña Blanca	lmb	EMPA	66.4167	19.3686	0	0.39779	0.262763	0	0.019063	7.20134	6.50506	0	0	0.055986	100.227	66.2661	19.3247	0	0.396888	0.262167	0	0.0190198	7.18501	6.49031	0	0	0.055859	100
ODG-4A	10.58052/IEODG000B	919	core	Montaña Blanca	lmb	EMPA	66.0125	19.1203	0	0.336274	0.292672	0	0.017004	7.11464	6.39992	0	0	0.05677	99.3501	66.4443	19.2454	0	0.338474	0.294587	0	0.0171152	7.16118	6.44179	0	0	0.0571414	100
ODG-4A	10.58052/IEODG000B	920	core	Montaña Blanca	lmb	EMPA	66.0173	19.1943	0	0.349798	0.277041	0	0	7.19892	6.25223	0	0	0.059788	99.3494	66.4496	19.32	0	0.352089	0.278855	0	0	7.24606	6.29317	0	0	0.0601795	100
ODG-4A	10.58052/IEODG000B	921	core	Montaña Blanca	lmb	EMPA	66.0318	19.1501	0.009046	0.333863	0.236004	0	0	7.05186	6.53651	0	0	0.060972	99.4102	66.4236	19.2637	0.00909967	0.335844	0.237404	0	0	7.0937	6.57529	0	0	0.0613338	100
ODG-4A	10.58052/IEODG000B	922	core	Montaña Blanca	lmb	EMPA	66.0697	19.0276	0	0.361778	0.239002	0	0.027379	7.07105	6.4622	0	0	0.061094	99.3198	66.5222	19.1579	0	0.364256	0.240639	0	0.0275665	7.11948	6.50646	0	0	0.0615124	100
ODG-4A	10.58052/IEODG000B	923	outer rim	Montaña Blanca	lmb	EMPA	66.0543	19.0281	0	0.338736	0.269019	0	0.02093	7.17079	6.39234	0	0	0.053695	99.3279	66.5012	19.1569	0	0.341028	0.270839	0	0.0210716	7.21931	6.43559	0	0	0.0540583	100
ODG-13A	10.58052/IEODG000K	578	core	Teide L	TL	EMPA	63.6285	21.2396	0	1.86097	0.228909	0.107182	1.44744	7.57239	3.86718	0	0	0.088655	100.041	63.6025	21.2309	0	1.86021	0.228816	0.107138	1.44685	7.5693	3.8656	0	0	0.0886188	100
ODG-13A	10.58052/IEODG000K	579	core	Teide L	TL	EMPA	65.2753	20.2349	0	1.13346	0.263563	0.106125	0.589352	7.81973	4.52103	0	0	0.083258	100.027	65.2579	20.2295	0	1.13316	0.263493	0.106097	0.589195	7.81764	4.51982	0	0	0.0832358	100
ODG-13A	10.58052/IEODG000K	580	core	Teide L	TL	EMPA	63.666	21.0925	0	1.86318	0.22922	0.144701	1.34736	7.78084	3.81567	0	0	0.100577	100.04	63.6405	21.0841	0	1.86243	0.229128	0.144643	1.34682	7.77773	3.81414	0	0	0.100537	100
ODG-13A	10.58052/IEODG000K	581	core	Teide L	TL	EMPA	63.6702	20.9934	0.013803	1.89281	0.311046	0.134955	1.17519	7.71857	3.85788	0	0	0.094955	99.8628	63.7577	21.0222	0.013822	1.89541	0.311473	0.13514	1.1768	7.72917	3.86318	0	0	0.0950854	100
ODG-13A	10.58052/IEODG000K	582	core	Teide L	TL	EMPA	65.1968	20.2067	0.02263	1.20366	0.256809	0.063576	0.523484	7.97028	4.4476	0	0	0.087163	99.9787	65.2107	20.211	0.0226348	1.20392	0.256864	0.0635895	0.523596	7.97198	4.44855	0	0	0.0871816	100
ODG-13A	10.58052/IEODG000K	583	core	Teide L	TL	EMPA	64.9387	20.2367	0	1.13846	0.270538	0.070581	0.57174	7.73623	4.64219	0	0	0.093465	99.6986	65.135	20.2979	0	1.1419	0.271356	0.0707944	0.573468	7.75962	4.65622	0	0	0.0937476	100
ODG-13A	10.58052/IEODG000K	584	core	Teide L	TL	EMPA	65.8622	19.6638	0	0.721104	0.244632	0.025187	0.222638	7.6665	5.41975	0	0	0.102332	99.9281	65.9096	19.6779	0	0.721623	0.244808	0.0252051	0.222798	7.67201	5.42365	0	0	0.102406	100
ODG-13A	10.58052/IEODG000K	586	core	Teide L	TL	EMPA	63.1452	20.9596	0.010368	1.84826	0.24019	0.117754	1.6272	7.51118	3.8707	0	0	0.109306	99.4398	63.501	21.0777	0.0104264	1.85867	0.241543	0.118417	1.63637	7.5535	3.89251	0	0	0.109922	100
ODG-13A	10.58052/IEODG000K	587	core	Teide L	TL	EMPA	65.4181	20.2968	0	1.17908	0.221888	0.062431	0.334641	8.04792	4.41102	0	0	0.076601	100.048	65.3864	20.287	0	1.17851	0.22178	0.0624007	0.334479	8.04402	4.40888	0	0	0.0765639	100
ODG-13A	10.58052/IEODG000K	588	core	Teide L	TL	EMPA	63.2361	21.2974	0	2.18002	0.287029	0.103934	1.31414	7.8112	3.56327	0	0	0.09295	99.886	63.3082	21.3217	0	2.18251	0.287356	0.104053	1.31564	7.82011	3.56734	0	0	0.093056	100
ODG-13A	10.58052/IEODG000K	589	core	Teide L	TL	EMPA	65.8041	19.929	0	0.916885	0.252976	0.049891	0.189963	7.89633	4.90758	0	0	0.072458	100.019	65.7915	19.9252	0	0.916709	0.252927	0.0498814	0.189927	7.89482	4.90664	0	0	0.0724441	100
ODG-13A	10.58052/IEODG000K	591	microlite	Teide L	TL	EMPA	64.2376	20.7728	0	2.07026	0.559744	0.049109	0.169611	8.09316	3.58399	0	0	0.22482	99.7611	64.3914	20.8225	0	2.07522	0.561084	0.0492266	0.170017	8.11254	3.59257	0	0	0.225358	100
ODG-13A	10.58052/IEODG000K	594	core	Teide L	TL	EMPA	62.062	21.6855	0	2.30914	0.202088	0.193007	2.6413	7.42198	3.55197	0	0	0.099301	100.166	61.959	21.6495	0	2.30531	0.201753	0.192687	2.63692	7.40966	3.54607	0	0	0.0991362	100
ODG-13A	10.58052/IEODG000K	596	core	Teide L	TL	EMPA	61.9505	21.8175	0	2.56899	0.287804	0.207508	2.49185	7.44713	3.27456	0	0	0.105212	100.151	61.8571	21.7846	0	2.56512	0.28737	0.207195	2.48809	7.4359	3.26962	0	0	0.105053	100
ODG-13A	10.58052/IEODG000K	598	core	Teide L	TL	EMPA	63.1356	21.0179	0	1.78393	0.309718	0.109145	1.91023	7.55206	4.00234	0	0	0.118487	99.9394	63.1739	21.0306	0	1.78501	0.309906	0.109211	1.91139	7.55664	4.00477	0	0	0.118559	100
ODG-13A	10.58052/IEODG000K	599	core	Teide L	TL	EMPA	63.751	20.8385	0	1.73532	0.30791	0.098024	1.32941	7.70317	3.92153	0	0	0.106155	99.791	63.8845	20.8821	0	1.73895	0.308555	0.0982293	1.33219	7.7193	3.92974	0	0	0.106377	100
ODG-13A	10.58052/IEODG000K	600	core	Teide L	TL	EMPA	65.4392	20.2276	0	1.19024	0.267854	0.026072	0.610271	7.9077	4.45598	0	0	0.083059	100.208	65.3034	20.1856	0	1.18777	0.267298	0.0260179	0.609004	7.89129	4.44673	0	0	0.0828866	100
ODG-13A	10.58052/IEODG000K	601	core	Teide L	TL	EMPA	66.1337	19.8262	0	0.906989	0.254986	0.040488	0.233383	7.86379	4.95224	0	0	0.072938	100.285	65.9459	19.7699	0	0.904414	0.254262	0.0403731	0.23272	7.84146	4.93818	0	0	0.0727309	100
ODG-13A	10.58052/IEODG000K	602	outer rim	Teide L	TL	EMPA	65.4807	20.2032	0.010058	1.1725	0.283526	0.071809	0.289586	7.99497	4.567	0	0	0.081123	100.154	65.3797	20.172	0.0100425	1.17069	0.283089	0.0716982	0.289139	7.98264	4.55996	0	0	0.0809979	100
ODG-13A	10.58052/IEODG000K	603	outer rim	Teide L	TL	EMPA	65.3654	20.3445	0	1.29209	0.285764	0.043912	0.289951	8.03201	4.4138	0	0	0.08707	100.154	65.2646	20.3131	0	1.2901	0.285323	0.0438443	0.289504	8.01962	4.40699	0	0	0.0869357	100
ODG-13A	10.58052/IEODG000K	605	core	Teide L	TL	EMPA	61.7344	21.9858	0	2.77299	0.244778	0.177136	2.03263	7.49497	3.12039	0	0	0.107167	99.6703	61.9386	22.0585	0	2.78216	0.245588	0.177722	2.03935	7.51977	3.13071	0	0	0.107522	100
ODG-13A	10.58052/IEODG000K	606	core	Teide L	TL	EMPA	61.7608	21.9812	0.007213	2.73409	0.236566	0.197505	2.37233	7.4549	3.09823	0	0	0.10054	99.9434	61.7958	21.9937	0.00721709	2.73564	0.2367	0.197617	2.37367	7.45912	3.09999	0	0	0.100597	100
ODG-13A	10.58052/IEODG000K	607	core	Teide L	TL	EMPA	63.0435	21.0704	0.007448	2.02924	0.301953	0.11518	1.31543	7.77761	3.49162	0	0	0.09932	99.2517	63.5188	21.2293	0.00750415	2.04454	0.30423	0.116048	1.32535	7.83625	3.51794	0	0	0.100069	100
ODG-13A	10.58052/IEODG000K	608	core	Teide L	TL	EMPA	64.8967	19.9058	0	0.974078	0.260927	0.059833	0.797872	7.80068	4.80485	0	0	0.084098	99.5848	65.1672	19.9888	0	0.978139	0.262015	0.0600824	0.801198	7.8332	4.82488	0	0	0.0844486	100
ODG-13A	10.58052/IEODG000K	609	core	Teide L	TL	EMPA	63.1328	21.054	0.006993	1.79409	0.196785	0.121608	1.82845	7.47727	4.13174	0	0	0.103032	99.8468	63.2297	21.0863	0.00700373	1.79684	0.197087	0.121795	1.83126	7.48875	4.13808	0	0	0.10319	100
ODG-13A	10.58052/IEODG000K	610	core	Teide L	TL	EMPA	64.3799	20.5421	0	1.45814	0.274428	0.062923	0.953776	7.84256	4.1886	0	0	0.087584	99.79	64.5154	20.5853	0	1.46121	0.275005	0.0630554	0.955783	7.85906	4.19741	0	0	0.0877683	100
ODG-13A	10.58052/IEODG000K	611	outer rim	Teide L	TL	EMPA	65.5949	20.0832	0.007326	1.13206	0.268857	0.049732	0.272168	8.11271	4.50335	0	0	0.071969	100.096	65.5318	20.0639	0.00731895	1.13097	0.268598	0.0496842	0.271906	8.10491	4.49902	0	0	0.0718998	100
ODG-13A	10.58052/IEODG000K	612	outer rim	Teide L	TL	EMPA	65.0232	20.2811	0.011489	1.25565	0.347341	0.04899	0.240986	7.99101	4.50396	0	0	0.102204	99.8059	65.1496	20.3205	0.0115113	1.25809	0.348016	0.0490853	0.241455	8.00655	4.51272	0	0	0.102403	100
ODG-13A	10.58052/IEODG000K	613	outer rim	Teide L	TL	EMPA	65.2953	20.2083	0	1.1738	0.284843	0.057775	0.264462	8.05969	4.42391	0	0	0.095156	99.8632	65.3847	20.236	0	1.17541	0.285233	0.0578541	0.264824	8.07073	4.42997	0	0	0.0952863	100
ODG-13A	10.58052/IEODG000K	614	core	Teide L	TL	EMPA	65.4873	20.1348	0	1.08202	0.286552	0.0517	0.295053	7.8435	4.68392	0	0	0.084503	99.9493	65.5205	20.145	0	1.08257	0.286697	0.0517262	0.295203	7.84747	4.68629	0	0	0.0845458	100
ODG-13A	10.58052/IEODG000K	615	microlite	Teide L	TL	EMPA	65.9205	19.9903	0	1.00376	0.35451	0.046463	0.240271	8.06258	4.69482	0	0	0.084662	100.398	65.6593	19.9111	0	0.999782	0.353105	0.0462789	0.239319	8.03063	4.67621	0	0	0.0843265	100
ODG-13A	10.58052/IEODG000K	616	microlite	Teide L	TL	EMPA	64.3774	20.9509	0.006832	2.19242	0.433788	0.026452	0.163798	8.12164	3.39605	0	0	0.142623	99.8119	64.4987	20.9904	0.00684488	2.19655	0.434605	0.0265018	0.164107	8.13695	3.40245	0	0	0.142892	100
ODG-13A	10.58052/IEODG000K	618	core	Teide L	TL	EMPA	65.3059	20.4203	0	1.51525	0.232499	0.068693	0.25434	8.22086	3.84547	0	0	0.08006	99.9434	65.3429	20.4319	0	1.51611	0.232631	0.0687319	0.254484	8.22552	3.84765	0	0	0.0801054	100
ODG-13A	10.58052/IEODG000K	619	core	Teide L	TL	EMPA	64.7475	20.5211	0	1.61042	0.301332	0.06387	0.221671	8.04657	3.74203	0	0	0.064779	99.3193	65.1913	20.6618	0	1.62146	0.303397	0.0643078	0.22319	8.10172	3.76768	0	0	0.065223	100
ODG-13A	10.58052/IEODG000K	620	core	Teide L	TL	EMPA	65.1989	20.465	0	1.58397	0.265236	0.074988	0.241559	8.24343	3.83554	0	0	0.074839	99.9835	65.2097	20.4684	0	1.58423	0.26528	0.0750004	0.241599	8.24479	3.83617	0	0	0.0748514	100
ODG-13A	10.58052/IEODG000K	622	core	Teide L	TL	EMPA	65.8247	19.6075	0	0.744448	0.277861	0	0.224671	7.73	5.1207	0	0	0.089633	99.6195	66.0761	19.6824	0	0.747291	0.278922	0	0.225529	7.75952	5.14026	0	0	0.0899753	100
ODG-13A	10.58052/IEODG000K	623	core	Teide L	TL	EMPA	65.4017	20.1871	0	1.33551	0.301445	0.094025	0.340784	7.98098	4.41065	0	0	0.091319	100.144	65.308	20.1582	0	1.3336	0.301013	0.0938903	0.340296	7.96954	4.40433	0	0	0.0911881	100
ODG-13A	10.58052/IEODG000K	624	outer rim	Teide L	TL	EMPA	64.6147	19.9565	0	1.26604	0.39968	0.05103	0.310853	7.74431	4.56626	0	0	0.214466	99.1238	65.1858	20.1329	0	1.27723	0.403213	0.0514811	0.313601	7.81276	4.60662	0	0	0.216362	100
ODG-13A	10.58052/IEODG000K	625	outer rim	Teide L	TL	EMPA	64.9828	20.3065	0	1.40636	0.243269	0.064027	0.252515	8.18354	3.974	0	0	0.071288	99.4843	65.3197	20.4118	0	1.41365	0.24453	0.0643589	0.253824	8.22596	3.9946	0	0	0.0716575	100
ODG-13A	10.58052/IEODG000K	626	microlite	Teide L	TL	EMPA	64.8287	20.4009	0	1.63409	0.458255	0.038344	0.143951	7.94853	4.22821	0	0	0.191738	99.8727	64.9113	20.4269	0	1.63617	0.458839	0.0383929	0.144134	7.95866	4.2336	0	0	0.191982	100
ODG-13A	10.58052/IEODG000K	628	microlite	Teide L	TL	EMPA	64.1489	20.9368	0.015213	2.25532	0.458343	0	0.104748	7.99566	3.64627	0	0	0.159024	99.7203	64.3288	20.9955	0.0152557	2.26165	0.459629	0	0.105042	8.01809	3.6565	0	0	0.15947	100
ODG-13A	10.58052/IEODG000K	629	core	Teide L	TL	EMPA	64.4012	20.7476	0	1.71273	0.245334	0.042593	0.775326	7.84791	3.92382	0	0	0.079586	99.7761	64.5457	20.7942	0	1.71657	0.245885	0.0426886	0.777066	7.86552	3.93263	0	0	0.0797646	100
ODG-13A	10.58052/IEODG000K	630	core	Teide L	TL	EMPA	65.0061	20.1231	0	1.06327	0.270445	0.037274	0.637887	7.78552	4.77206	0	0	0.068621	99.7643	65.1597	20.1706	0	1.06578	0.271084	0.0373621	0.639394	7.80392	4.78334	0	0	0.0687831	100
ODG-13A	10.58052/IEODG000K	631	core	Teide L	TL	EMPA	64.5509	21.2	0	2.20784	0.228727	0.03649	0.448751	8.08693	3.29154	0	0.027021	0.070832	100.149	64.4548	21.1685	0	2.20455	0.228387	0.0364357	0.448083	8.0749	3.28664	0	0.0269808	0.0707266	100
ODG-13A	10.58052/IEODG000K	632	outer rim	Teide L	TL	EMPA	65.2666	20.1088	0	1.17771	0.311601	0.05069	0.254997	7.86314	4.44736	0	0	0.082115	99.563	65.5531	20.1971	0	1.18288	0.312969	0.0509125	0.256116	7.89765	4.46688	0	0	0.0824754	100
ODG-13A	10.58052/IEODG000K	633	core	Teide L	TL	EMPA	65.4132	20.1177	0	1.25599	0.30442	0.089124	0.28071	8.03797	4.40069	0	0	0.086548	99.9864	65.4221	20.1204	0	1.25616	0.304462	0.0891362	0.280748	8.03907	4.40129	0	0	0.0865598	100
ODG-13A	10.58052/IEODG000K	634	core	Teide L	TL	EMPA	65.2515	20.1317	0	1.20646	0.310623	0.061804	0.257102	8.00648	4.51993	0	0	0.076163	99.8218	65.368	20.1676	0	1.20861	0.311178	0.0619144	0.257561	8.02078	4.528	0	0	0.076299	100
ODG-13A	10.58052/IEODG000K	635	outer rim	Teide L	TL	EMPA	65.1774	19.9159	0	1.03563	0.300602	0.064339	0.231968	7.84196	4.80344	0	0	0.086398	99.4576	65.5328	20.0245	0	1.04128	0.302241	0.0646899	0.233233	7.88472	4.82963	0	0	0.0868691	100
ODG-13A	10.58052/IEODG000K	636	core	Teide L	TL	EMPA	65.0168	20.065	0	1.26028	0.233413	0.050045	0.428722	7.87077	4.50183	0	0	0.080062	99.5069	65.339	20.1644	0	1.26652	0.23457	0.050293	0.430846	7.90977	4.52414	0	0	0.0804587	100
ODG-13A	10.58052/IEODG000K	637	core	Teide L	TL	EMPA	65.975	19.8944	0	0.928142	0.256212	0	0.208591	8.03427	4.6519	0	0	0.078965	100.027	65.9569	19.8889	0	0.927887	0.256142	0	0.208534	8.03206	4.65062	0	0	0.0789433	100
ODG-13A	10.58052/IEODG000K	638	core	Teide L	TL	EMPA	65.3161	19.8084	0	0.871838	0.242702	0.02496	0.608346	7.65578	5.01636	0	0	0.085874	99.6304	65.5584	19.8819	0	0.875073	0.243602	0.0250526	0.610603	7.68418	5.03497	0	0	0.0861926	100
ODG-13A	10.58052/IEODG000K	639	core	Teide L	TL	EMPA	65.2293	19.834	0.014226	0.992286	0.270033	0.027384	0.466736	7.71357	4.82949	0	0	0.08361	99.4606	65.583	19.9416	0.0143031	0.997667	0.271497	0.0275325	0.469267	7.7554	4.85568	0	0	0.0840634	100
ODG-13A	10.58052/IEODG000K	640	core	Teide L	TL	EMPA	65.0145	20.1588	0	1.23214	0.272712	0.056731	0.542608	7.7967	4.60582	0	0	0.087493	99.7675	65.166	20.2058	0	1.23501	0.273348	0.0568632	0.543872	7.81487	4.61655	0	0	0.0876969	100
ODG-13A	10.58052/IEODG000K	642	core	Teide L	TL	EMPA	65.5367	19.6872	0	0.881312	0.255823	0.02595	0.245365	7.9387	4.85047	0	0	0.07482	99.4963	65.8685	19.7869	0	0.885773	0.257118	0.0260814	0.246607	7.97889	4.87502	0	0	0.0751987	100
ODG-13A	10.58052/IEODG000K	643	core	Teide L	TL	EMPA	65.5772	19.9891	0	1.10736	0.256901	0.053055	0.258236	7.99882	4.60875	0	0	0.066317	99.9157	65.6325	20.006	0	1.10829	0.257118	0.0530997	0.258454	8.00557	4.61264	0	0	0.0663729	100
ODG-13A	10.58052/IEODG000K	644	core	Teide L	TL	EMPA	65.3229	20.1223	0	1.24479	0.269794	0.041698	0.25201	7.97985	4.44487	0	0	0.081558	99.7598	65.4802	20.1708	0	1.24779	0.270444	0.0417984	0.252617	7.99907	4.45557	0	0	0.0817544	100
ODG-13A	10.58052/IEODG000K	645	core	Teide L	TL	EMPA	65.4759	20.0198	0	1.13227	0.23572	0.058475	0.289097	7.83024	4.66844	0	0	0.088853	99.7988	65.6079	20.0602	0	1.13455	0.236195	0.0585929	0.28968	7.84603	4.67785	0	0	0.0890321	100
ODG-13A	10.58052/IEODG000K	646	core	Teide L	TL	EMPA	65.2231	20.0018	0	1.1742	0.321425	0.058197	0.258429	7.86534	4.44338	0	0	0.104591	99.4505	65.5835	20.1123	0	1.18069	0.323201	0.0585186	0.259857	7.9088	4.46793	0	0	0.105169	100
ODG-13A	10.58052/IEODG000K	647	outer rim	Teide L	TL	EMPA	64.9493	20.2014	0.012601	1.32082	0.295529	0.064953	0.294564	7.93105	4.20923	0	0	0.083626	99.3631	65.3656	20.3309	0.0126818	1.32929	0.297423	0.0653694	0.296452	7.98189	4.23621	0	0	0.0841621	100
ODG-13A	10.58052/IEODG000K	648	microlite	Teide L	TL	EMPA	65.0204	19.8793	0	1.1202	0.327149	0.065106	0.282506	7.85635	4.57573	0	0	0.093398	99.2201	65.5315	20.0355	0	1.129	0.32972	0.0656177	0.284726	7.9181	4.61169	0	0	0.0941321	100
ODG-13A	10.58052/IEODG000K	649	microlite	Teide L	TL	EMPA	64.3145	20.817	0	2.05593	0.4439	0.030008	0.16379	7.77963	3.90376	0	0	0.155397	99.6639	64.5314	20.8872	0	2.06286	0.445397	0.0301092	0.164342	7.80586	3.91692	0	0	0.155921	100
ODG-13A	10.58052/IEODG000K	650	core	Teide L	TL	EMPA	65.7111	19.6796	0	0.7055	0.214906	0	0.223156	7.29053	5.14489	0	0	0.067899	99.0376	66.3497	19.8708	0	0.712356	0.216994	0	0.225325	7.36138	5.19489	0	0	0.0685588	100
ODG-13A	10.58052/IEODG000K	651	core	Teide L	TL	EMPA	65.6471	19.6603	0	0.666796	0.247503	0.034236	0.214598	7.48017	5.47508	0	0	0.072705	99.4985	65.978	19.7594	0	0.670157	0.248751	0.0344086	0.21568	7.51787	5.50268	0	0	0.0730715	100
ODG-13A	10.58052/IEODG000K	652	core	Teide L	TL	EMPA	65.4096	19.7875	0	0.884729	0.256591	0.024552	0.241775	7.80901	5.06373	0	0	0.078918	99.5564	65.701	19.8757	0	0.888671	0.257734	0.0246614	0.242852	7.8438	5.08629	0	0	0.0792696	100
ODG-13A	10.58052/IEODG000K	653	core	Teide L	TL	EMPA	65.6939	19.7459	0	0.891996	0.222205	0	0.167085	7.90325	4.93566	0	0	0.071216	99.6312	65.9371	19.819	0	0.895298	0.223027	0	0.167703	7.9325	4.95393	0	0	0.0714796	100
ODG-13A	10.58052/IEODG000K	654	core	Teide L	TL	EMPA	65.8093	20.1088	0.01103	1.09848	0.24317	0.030761	0.14572	7.80306	4.66321	0	0	0.087087	100.001	65.8089	20.1087	0.0110299	1.09847	0.243168	0.0307608	0.145719	7.80301	4.66318	0	0	0.0870865	100
ODG-13A	10.58052/IEODG000K	655	core	Teide L	TL	EMPA	65.2769	20.2456	0	1.19719	0.253307	0.040158	0.36864	7.96684	4.64669	0	0	0.081894	100.077	65.2265	20.23	0	1.19627	0.253112	0.040127	0.368356	7.96069	4.6431	0	0	0.0818308	100
ODG-13A	10.58052/IEODG000K	656	core	Teide L	TL	EMPA	65.6685	19.7786	0	0.992684	0.278654	0.069876	0.204574	7.9298	4.71465	0	0	0.137245	99.7746	65.8169	19.8233	0	0.994927	0.279284	0.0700339	0.205036	7.94772	4.7253	0	0	0.137555	100
ODG-13A	10.58052/IEODG000K	657	outer rim	Teide L	TL	EMPA	65.5734	19.9333	0	0.941018	0.279841	0.046186	0.235657	8.06583	4.65939	0	0	0.072562	99.8072	65.7001	19.9718	0	0.942836	0.280382	0.0462752	0.236112	8.08141	4.66839	0	0	0.0727022	100
ODG-13A	10.58052/IEODG000K	661	core	Teide L	TL	EMPA	64.6472	20.2821	0	1.37581	0.313392	0	0.574196	7.93803	4.39137	0	0	0.136257	99.6584	64.8688	20.3516	0	1.38053	0.314466	0	0.576164	7.96524	4.40642	0	0	0.136724	100
ODG-13A	10.58052/IEODG000K	662	core	Teide L	TL	EMPA	65.1465	20.0929	0	1.20782	0.267316	0.02509	0.378522	7.89176	4.50728	0	0	0.070327	99.5875	65.4163	20.1761	0	1.21282	0.268423	0.0251939	0.38009	7.92445	4.52595	0	0	0.0706183	100
ODG-13A	10.58052/IEODG000K	663	core	Teide L	TL	EMPA	64.851	20.4676	0	1.45768	0.225193	0	0.567713	8.0725	3.9852	0	0	0.124775	99.7517	65.0125	20.5186	0	1.46131	0.225754	0	0.569126	8.0926	3.99512	0	0	0.125086	100
ODG-13A	10.58052/IEODG000K	665	core	Teide L	TL	EMPA	64.9712	20.1763	0	1.32888	0.228862	0	0.330878	8.00662	4.16723	0	0	0.063582	99.2736	65.4466	20.3239	0	1.3386	0.230537	0	0.333299	8.06521	4.19772	0	0	0.0640473	100
ODG-13A	10.58052/IEODG000K	666	core	Teide L	TL	EMPA	65.1991	20.1839	0.007787	1.34907	0.252169	0	0.214821	8.0965	4.27911	0	0	0.088302	99.6708	65.4145	20.2506	0.00781272	1.35353	0.253002	0	0.215531	8.12325	4.29325	0	0	0.0885937	100
ODG-13A	10.58052/IEODG000K	667	core	Teide L	TL	EMPA	65.2884	20.0642	0	1.2009	0.210136	0	0.288808	8.08825	4.4563	0	0	0.064816	99.6618	65.5099	20.1323	0	1.20498	0.210849	0	0.289788	8.1157	4.47142	0	0	0.0650359	100
ODG-13A	10.58052/IEODG000K	668	core	Teide L	TL	EMPA	65.2667	20.0029	0	1.27253	0.315395	0.034802	0.297239	8.11569	4.35207	0	0.028097	0.072689	99.7581	65.425	20.0514	0	1.27562	0.31616	0.0348864	0.29796	8.13537	4.36262	0	0.0281651	0.0728653	100
ODG-13A	10.58052/IEODG000K	669	core	Teide L	TL	EMPA	64.414	20.4288	0	1.55738	0.268917	0.018449	0.556714	7.86348	4.07443	0	0	0.075976	99.2581	64.8954	20.5815	0	1.56902	0.270927	0.0185869	0.560875	7.92225	4.10488	0	0	0.0765438	100
ODG-13A	10.58052/IEODG000K	670	core	Teide L	TL	EMPA	65.5458	19.6529	0	0.806394	0.245784	0.023606	0.204271	7.68361	5.20874	0	0	0.065945	99.4371	65.9169	19.7642	0	0.810959	0.247175	0.0237396	0.205427	7.72711	5.23823	0	0	0.0663183	100
ODG-13A	10.58052/IEODG000K	671	core	Teide L	TL	EMPA	65.2279	20.1108	0	1.28337	0.255714	0.04664	0.271006	8.1141	4.35904	0	0	0.086936	99.7555	65.3878	20.1601	0	1.28652	0.256341	0.0467543	0.27167	8.13399	4.36972	0	0	0.0871491	100
ODG-13A	10.58052/IEODG000K	672	outer rim	Teide L	TL	EMPA	65.453	20.1351	0.011262	1.20584	0.280582	0.068312	0.234923	7.91235	4.49384	0	0	0.089158	99.8844	65.5288	20.1584	0.011275	1.20724	0.280907	0.0683911	0.235195	7.92151	4.49904	0	0	0.0892612	100
ODG-13A	10.58052/IEODG000K	673	outer rim	Teide L	TL	EMPA	64.3849	20.4307	0	1.51653	0.241518	0.07687	0.402774	8.00056	3.83123	0	0	0.086228	98.9713	65.0541	20.6431	0	1.53229	0.244028	0.077669	0.40696	8.08372	3.87105	0	0	0.0871242	100
ODG-13A	10.58052/IEODG000K	674	outer rim	Teide L	TL	EMPA	64.9353	19.9205	0	1.09403	0.285467	0.052928	0.256318	7.94878	4.56053	0	0	0.085984	99.1398	65.4987	20.0933	0	1.10352	0.287944	0.0533872	0.258542	8.01775	4.6001	0	0	0.08673	100
ODG-13A	10.58052/IEODG000K	675	microlite	Teide L	TL	EMPA	64.5776	20.3545	0.006905	1.63227	0.421957	0.028112	0.150969	7.96107	4.20117	0	0	0.225313	99.5599	64.8631	20.4445	0.00693553	1.63949	0.423822	0.0282363	0.151636	7.99626	4.21974	0	0	0.226309	100
ODG-13A	10.58052/IEODG000K	676	outer rim	Teide L	TL	EMPA	65.1381	20.4755	0	1.55078	0.255669	0.082194	0.26953	8.04403	3.978	0	0	0.087255	99.8811	65.2157	20.4999	0	1.55263	0.255973	0.0822919	0.269851	8.05361	3.98274	0	0	0.0873589	100
ODG-13A	10.58052/IEODG000K	677	core	Teide L	TL	EMPA	62.676	21.169	0	2.00938	0.227141	0.121515	1.91111	7.54865	3.70877	0	0	0.113014	99.4846	63.0007	21.2787	0	2.01979	0.228318	0.122145	1.92101	7.58776	3.72798	0	0	0.1136	100
ODG-13A	10.58052/IEODG000K	678	core	Teide L	TL	EMPA	65.3621	19.7355	0	0.812111	0.278834	0.04515	0.652087	7.59475	5.13933	0	0	0.089756	99.7096	65.5525	19.793	0	0.814476	0.279646	0.0452815	0.653986	7.61687	5.1543	0	0	0.0900174	100
ODG-13A	10.58052/IEODG000K	679	core	Teide L	TL	EMPA	65.1741	20.0768	0	1.14002	0.229002	0.06337	0.470511	7.77549	4.62153	0	0	0.085362	99.6362	65.4121	20.1501	0	1.14418	0.229838	0.0636014	0.472229	7.80388	4.63841	0	0	0.0856737	100
ODG-13A	10.58052/IEODG000K	680	outer rim	Teide L	TL	EMPA	65.1281	19.6042	0	0.812927	0.314899	0	0.263067	7.6289	5.2442	0	0	0.117585	99.1139	65.7104	19.7795	0	0.820195	0.317714	0	0.265419	7.69711	5.29109	0	0	0.118636	100
ODG-13A	10.58052/IEODG000K	681	core	Teide L	TL	EMPA	65.5437	20.2116	0.007519	1.26529	0.217898	0.067636	0.231072	8.01273	4.3649	0	0	0.078929	100.001	65.5429	20.2113	0.0075189	1.26527	0.217895	0.0676351	0.231069	8.01263	4.36484	0	0	0.078928	100
ODG-13A	10.58052/IEODG000K	682	core	Teide L	TL	EMPA	65.1561	20.2833	0	1.22522	0.273407	0.06138	0.582904	7.85041	4.48621	0	0	0.074723	99.9937	65.1602	20.2846	0	1.2253	0.273424	0.0613839	0.582941	7.85091	4.48649	0	0	0.0747277	100
ODG-13A	10.58052/IEODG000K	683	core	Teide L	TL	EMPA	64.7705	20.1991	0	1.30497	0.251143	0.065795	0.69218	7.86997	4.43376	0	0	0.082527	99.6699	64.985	20.266	0	1.30929	0.251975	0.0660129	0.694472	7.89603	4.44844	0	0	0.0828003	100
ODG-13A	10.58052/IEODG000K	684	core	Teide L	TL	EMPA	65.4773	20.236	0	1.1034	0.25168	0.04792	0.540989	7.91134	4.63842	0	0	0.072401	100.279	65.2948	20.1796	0	1.10033	0.250979	0.0477865	0.539481	7.88929	4.62549	0	0	0.0721992	100
ODG-13A	10.58052/IEODG000K	685	core	Teide L	TL	EMPA	65.0167	20.3918	0.009773	1.36668	0.215251	0.034337	0.445511	8.0465	4.30326	0	0	0.087151	99.917	65.0707	20.4087	0.00978112	1.36782	0.21543	0.0343655	0.445881	8.05319	4.30684	0	0	0.0872234	100
ODG-13A	10.58052/IEODG000K	686	core	Teide L	TL	EMPA	65.7202	19.7599	0.007629	0.858502	0.270508	0.049638	0.197901	7.82409	4.9944	0	0	0.07649	99.7593	65.8788	19.8076	0.00764741	0.860574	0.271161	0.0497578	0.198379	7.84297	5.00645	0	0	0.0766746	100
ODG-13A	10.58052/IEODG000K	687	core	Teide L	TL	EMPA	65.8071	19.8644	0	0.92118	0.245761	0.057387	0.218428	7.98368	4.68706	0	0	0.084774	99.8698	65.8929	19.8903	0	0.922381	0.246081	0.0574618	0.218713	7.99409	4.69317	0	0	0.0848845	100
ODG-13A	10.58052/IEODG000K	688	core	Teide L	TL	EMPA	65.054	20.1351	0.007364	1.30316	0.29012	0.085153	0.280028	7.95068	4.44981	0	0	0.082383	99.6378	65.2905	20.2083	0.00739077	1.3079	0.291175	0.0854625	0.281046	7.97958	4.46599	0	0	0.0826825	100
ODG-13A	10.58052/IEODG000K	689	outer rim	Teide L	TL	EMPA	65.0175	20.2491	0	1.34887	0.267428	0.090912	0.270455	7.88925	4.29366	0	0	0.090137	99.5173	65.3329	20.3473	0	1.35541	0.268725	0.0913529	0.271767	7.92752	4.31449	0	0	0.0905742	100
ODG-13A	10.58052/IEODG000K	690	microlite	Teide L	TL	EMPA	65.4947	20.0468	0	1.14324	0.310062	0.090624	0.273831	7.84983	4.51697	0	0	0.086074	99.8121	65.618	20.0845	0	1.14539	0.310646	0.0907946	0.274346	7.86461	4.52547	0	0	0.086236	100
ODG-13A	10.58052/IEODG000K	692	core	Teide L	TL	EMPA	65.1847	19.9696	0	1.15408	0.248864	0	0.541503	7.81391	4.69157	0	0	0.091493	99.6957	65.3836	20.0305	0	1.1576	0.249624	0	0.543156	7.83776	4.70589	0	0	0.0917722	100
ODG-13A	10.58052/IEODG000K	693	core	Teide L	TL	EMPA	65.4457	19.8064	0.008161	0.954809	0.215249	0.021459	0.402412	7.83304	4.81148	0	0	0.078	99.5767	65.7239	19.8906	0.00819569	0.958868	0.216164	0.0215502	0.404123	7.86634	4.83193	0	0	0.0783316	100
ODG-13A	10.58052/IEODG000K	694	outer rim	Teide L	TL	EMPA	65.6078	20.1077	0	1.10968	0.269654	0.054329	0.286837	8.12595	4.49454	0	0	0.086973	100.143	65.5138	20.0789	0	1.10809	0.269268	0.0542512	0.286426	8.11431	4.4881	0	0	0.0868484	100
ODG-13A	10.58052/IEODG000K	696	core	Teide L	TL	EMPA	65.2566	20.1285	0	1.19317	0.28812	0.034384	0.4539	7.84518	4.54008	0	0	0.079304	99.8192	65.3748	20.165	0	1.19533	0.288642	0.0344463	0.454722	7.85939	4.5483	0	0	0.0794476	100
ODG-13A	10.58052/IEODG000K	697	core	Teide L	TL	EMPA	65.2108	20.0408	0	1.11972	0.261616	0.038081	0.319302	7.97322	4.5502	0	0	0.073164	99.5869	65.4813	20.1239	0	1.12436	0.262701	0.038239	0.320626	8.00629	4.56907	0	0	0.0734675	100
ODG-13A	10.58052/IEODG000K	698	outer rim	Teide L	TL	EMPA	65.6126	19.9543	0	1.03789	0.26999	0.038348	0.239752	7.84454	4.62528	0	0	0.093496	99.7162	65.7993	20.0111	0	1.04084	0.270758	0.0384571	0.240434	7.86687	4.63844	0	0	0.0937621	100
ODG-13A	10.58052/IEODG000K	700	core	Teide L	TL	EMPA	64.4677	20.4511	0	1.52688	0.286654	0.120106	0.793142	7.76852	4.30443	0	0	0.09331	99.8118	64.5892	20.4897	0	1.52976	0.287194	0.120332	0.794637	7.78316	4.31254	0	0	0.0934859	100
ODG-13A	10.58052/IEODG000K	701	core	Teide L	TL	EMPA	65.0247	20.3788	0	1.35017	0.320207	0.065461	0.393434	8.01257	4.22142	0	0	0.092537	99.8593	65.1163	20.4075	0	1.35207	0.320658	0.0655532	0.393988	8.02386	4.22737	0	0	0.0926674	100
ODG-13A	10.58052/IEODG000K	702	outer rim	Teide L	TL	EMPA	65.0392	20.1647	0	1.21551	0.295891	0.071769	0.26013	7.97865	4.31186	0	0	0.088616	99.4263	65.4145	20.281	0	1.22252	0.297598	0.0721831	0.261631	8.02469	4.33674	0	0	0.0891273	100
ODG-13A	10.58052/IEODG000K	703	core	Teide L	TL	EMPA	65.1465	20.125	0	1.20323	0.228837	0.056983	0.280874	7.99345	4.40372	0	0.024963	0.080554	99.5441	65.4449	20.2172	0	1.20874	0.229885	0.057244	0.28216	8.03006	4.42389	0	0.0250773	0.0809229	100
ODG-13A	10.58052/IEODG000K	704	microlite	Teide L	TL	EMPA	64.5687	20.8205	0.009094	2.02771	0.431022	0.043454	0.192223	8.29054	3.12424	0	0	0.1843	99.6918	64.7683	20.8849	0.00912212	2.03398	0.432355	0.0435883	0.192817	8.31617	3.1339	0	0	0.18487	100
ODG-13A	10.58052/IEODG000K	705	core	Teide L	TL	EMPA	64.7208	20.3049	0	1.41161	0.239247	0.071961	0.455509	7.98484	4.13713	0	0	0.088146	99.4141	65.1022	20.4246	0	1.41993	0.240657	0.0723851	0.458193	8.0319	4.16151	0	0	0.0886655	100
ODG-13A	10.58052/IEODG000K	706	outer rim	Teide L	TL	EMPA	65.254	20.1036	0	1.21592	0.233615	0.05183	0.306881	7.93766	4.50087	0	0	0.089862	99.6942	65.4541	20.1653	0	1.21965	0.234331	0.051989	0.307822	7.962	4.51467	0	0	0.0901376	100
ODG-18A	10.58052/IEODG000P	181	core	Pico Viejo H	PVH	EMPA	56.4366	27.1078	0.031331	9.19389	0.381524	0.396867	0.113593	5.91935	0.549011		0	0.149008	100.279	56.2796	27.0324	0.0312438	9.16831	0.380463	0.395763	0.113277	5.90288	0.547484	0	0	0.148593	100
ODG-18A	10.58052/IEODG000P	182	core	Pico Viejo H	PVH	EMPA	56.033	27.3039	0.037515	9.46421	0.423232	0.403073	0.093744	5.76277	0.52371		0	0.138954	100.184	55.93	27.2537	0.0374461	9.44682	0.422454	0.402332	0.0935717	5.75218	0.522748	0	0	0.138699	100
ODG-18A	10.58052/IEODG000P	183	core	Pico Viejo H	PVH	EMPA	55.5147	27.6232	0.039987	9.76718	0.510684	0.426578	0.098118	5.56894	0.478614		0	0.135853	100.164	55.4239	27.578	0.0399216	9.7512	0.509849	0.42588	0.0979575	5.55983	0.477831	0	0	0.135631	100
ODG-18A	10.58052/IEODG000P	184	core	Pico Viejo H	PVH	EMPA	56.0103	27.4339	0.042406	9.45169	0.432086	0.427287	0.111518	5.73051	0.522194		0	0.121789	100.284	55.8519	27.3563	0.042286	9.42495	0.430864	0.426078	0.111203	5.7143	0.520717	0	0	0.121444	100
ODG-18A	10.58052/IEODG000P	185	core	Pico Viejo H	PVH	EMPA	55.6422	27.5907	0.043661	9.71027	0.451926	0.411596	0.083257	5.69205	0.477899		0	0.124698	100.228	55.5155	27.5279	0.0435616	9.68816	0.450897	0.410659	0.0830674	5.67909	0.476811	0	0	0.124414	100
ODG-18A	10.58052/IEODG000P	186	core	Pico Viejo H	PVH	EMPA	55.8802	27.4399	0.034875	9.59494	0.456861	0.393313	0.099086	5.71793	0.541149		0	0.138441	100.297	55.7149	27.3587	0.0347718	9.56656	0.45551	0.39215	0.0987929	5.70102	0.539548	0	0	0.138031	100
ODG-18A	10.58052/IEODG000P	187	outer rim	Pico Viejo H	PVH	EMPA	58.6683	25.5226	0.026372	7.17688	0.357027	0.410839	0.204209	6.73161	0.9506		0	0.143282	100.192	58.556	25.4738	0.0263215	7.16315	0.356344	0.410053	0.203818	6.71873	0.948781	0	0	0.143008	100
ODG-18A	10.58052/IEODG000P	188	outer rim	Pico Viejo H	PVH	EMPA	61.5115	23.5319	0.017764	4.66446	0.388687	0.326028	0.455852	7.78382	1.43599		0	0.159835	100.276	61.3423	23.4672	0.0177151	4.65163	0.387618	0.325131	0.454598	7.76241	1.43204	0	0	0.159395	100
ODG-18A	10.58052/IEODG000P	189	core	Pico Viejo H	PVH	EMPA	54.936	27.9624	0.046715	10.2651	0.45105	0.472296	0.082222	5.41873	0.464164		0	0.113003	100.212	54.82	27.9033	0.0466163	10.2434	0.450097	0.471298	0.0820483	5.40728	0.463184	0	0	0.112764	100
ODG-18A	10.58052/IEODG000P	190	outer rim	Pico Viejo H	PVH	EMPA	58.1836	25.7058	0.031579	7.39501	0.368929	0.406864	0.184694	6.73512	0.866021		0	0.145511	100.023	58.1701	25.6999	0.0315717	7.3933	0.368844	0.40677	0.184651	6.73356	0.865821	0	0	0.145477	100
ODG-18A	10.58052/IEODG000P	191	core	Pico Viejo H	PVH	EMPA	56.0649	27.0118	0.035919	9.1624	0.465879	0.404657	0.088434	5.8126	0.516428		0	0.134534	99.6976	56.235	27.0937	0.036028	9.1902	0.467292	0.405885	0.0887023	5.83023	0.517995	0	0	0.134942	100
ODG-18A	10.58052/IEODG000P	192	microlite	Pico Viejo H	PVH	EMPA	55.1946	27.7878	0.042309	10.1921	0.529919	0.422249	0.093143	5.41853	0.437873		0	0.143195	100.262	55.0505	27.7153	0.0421986	10.1655	0.528536	0.421147	0.0928999	5.40439	0.43673	0	0	0.142821	100
ODG-18A	10.58052/IEODG000P	193	microlite	Pico Viejo H	PVH	EMPA	59.5474	24.9349	0.023102	6.34117	0.320558	0.403287	0.246706	7.1766	0.92483		0	0.160064	100.079	59.5006	24.9153	0.0230839	6.33619	0.320306	0.40297	0.246512	7.17096	0.924103	0	0	0.159938	100
ODG-18A	10.58052/IEODG000P	194	core	Pico Viejo H	PVH	EMPA	49.1825	32.12	0.023838	14.8945	0.356702	0.32518	0.043681	2.85429	0.150628		0	0.110686	100.062	49.152	32.1001	0.0238232	14.8853	0.356481	0.324978	0.0436539	2.85252	0.150535	0	0	0.110617	100
ODG-18A	10.58052/IEODG000P	195	core	Pico Viejo H	PVH	EMPA	49.454	31.9873	0.036611	14.7412	0.369798	0.334832	0.032295	3.00654	0.146761		0	0.125023	100.234	49.3384	31.9125	0.0365254	14.7067	0.368933	0.334049	0.0322195	2.99951	0.146418	0	0	0.124731	100
ODG-18A	10.58052/IEODG000P	196	core	Pico Viejo H	PVH	EMPA	52.809	29.478	0.036632	11.7459	0.373833	0.330267	0.036745	4.67841	0.283627		0	0.141603	99.914	52.8544	29.5034	0.0366635	11.756	0.374155	0.330551	0.0367766	4.68244	0.283871	0	0	0.141725	100
ODG-18A	10.58052/IEODG000P	197	core	Pico Viejo H	PVH	EMPA	51.5405	30.2002	0.040573	12.8298	0.394718	0.331315	0.038757	3.91053	0.46351		0	0.117572	99.8675	51.6089	30.2403	0.0406268	12.8468	0.395242	0.331755	0.0388084	3.91572	0.464125	0	0	0.117728	100
ODG-18A	10.58052/IEODG000P	198	core	Pico Viejo H	PVH	EMPA	52.2956	30.0667	0.031549	12.4725	0.379106	0.366228	0.016226	4.36459	0.275866		0	0.150343	100.419	52.0775	29.9413	0.0314175	12.4205	0.377525	0.364701	0.0161583	4.34639	0.274716	0	0	0.149716	100
ODG-18A	10.58052/IEODG000P	199	core	Pico Viejo H	PVH	EMPA	54.277	28.5692	0.042618	10.8349	0.402955	0.331067	0.060346	5.03572	0.377314		0	0.14943	100.081	54.2333	28.5462	0.0425837	10.8262	0.402631	0.330801	0.0602974	5.03167	0.37701	0	0	0.14931	100
ODG-18A	10.58052/IEODG000P	200	core	Pico Viejo H	PVH	EMPA	55.6702	27.6261	0.035566	9.91531	0.360724	0.334466	0.071112	5.55598	0.481786		0	0.143993	100.195	55.5617	27.5723	0.0354967	9.89599	0.360021	0.333814	0.0709734	5.54515	0.480847	0	0	0.143712	100
ODG-18A	10.58052/IEODG000P	201	outer rim	Pico Viejo H	PVH	EMPA	56.718	26.8466	0.028764	8.63254	0.362248	0.386742	0.1055	6.16145	0.610429		0	0.15213	100.004	56.7155	26.8454	0.0287627	8.63216	0.362232	0.386725	0.105495	6.16118	0.610402	0	0	0.152123	100
ODG-18A	10.58052/IEODG000P	202	core	Pico Viejo H	PVH	EMPA	53.745	28.9309	0.041262	11.1762	0.356642	0.349414	0.061707	4.85575	0.384459		0.029946	0.154144	100.085	53.6991	28.9062	0.0412268	11.1667	0.356338	0.349116	0.0616543	4.85161	0.384131	0	0.0299204	0.154012	100
ODG-18A	10.58052/IEODG000P	203	core	Pico Viejo H	PVH	EMPA	52.6341	29.744	0.037919	12.1586	0.365166	0.300046	0.036492	4.44971	0.334054		0	0.15146	100.212	52.523	29.6812	0.037839	12.1329	0.364395	0.299413	0.036415	4.44032	0.333349	0	0	0.15114	100
ODG-18A	10.58052/IEODG000P	204	core	Pico Viejo H	PVH	EMPA	52.8618	29.482	0.042002	11.9425	0.364151	0.369091	0.055336	4.50004	0.328183		0	0.146248	100.091	52.8136	29.4551	0.0419637	11.9316	0.363819	0.368754	0.0552855	4.49593	0.327883	0	0	0.146115	100
ODG-18A	10.58052/IEODG000P	205	core	Pico Viejo H	PVH	EMPA	53.852	28.8008	0.040602	11.0033	0.420294	0.373922	0.056321	4.97025	0.390979		0	0.148712	100.057	53.8212	28.7843	0.0405788	10.997	0.420054	0.373708	0.0562888	4.96741	0.390756	0	0	0.148627	100
ODG-18A	10.58052/IEODG000P	206	core	Pico Viejo H	PVH	EMPA	56.7759	26.8696	0.032096	8.7503	0.330807	0.400699	0.097663	6.03249	0.630719		0	0.153426	100.074	56.7341	26.8498	0.0320724	8.74386	0.330563	0.400404	0.0975911	6.02805	0.630255	0	0	0.153313	100
ODG-18A	10.58052/IEODG000P	207	outer rim	Pico Viejo H	PVH	EMPA	55.4521	27.8256	0.026316	9.81332	0.426533	0.474281	0.08187	5.60209	0.406385		0	0.122855	100.231	55.3241	27.7614	0.0262553	9.79067	0.425548	0.473186	0.081681	5.58916	0.405447	0	0	0.122571	100
ODG-18A	10.58052/IEODG000P	208	microlite	Pico Viejo H	PVH	EMPA	55.2808	27.7564	0.03398	9.91788	0.452347	0.494945	0.079609	5.56061	0.368419		0	0.121998	100.067	55.2438	27.7378	0.0339573	9.91124	0.452044	0.494614	0.0795557	5.55689	0.368172	0	0	0.121916	100
ODG-18A	10.58052/IEODG000P	209	microlite	Pico Viejo H	PVH	EMPA	58.2874	25.6786	0.02167	7.36307	0.410098	0.366612	0.16504	6.78646	0.739018		0	0.142064	99.96	58.3107	25.6889	0.0216787	7.36601	0.410262	0.366759	0.165106	6.78917	0.739313	0	0	0.142121	100
ODG-18A	10.58052/IEODG000P	210	microlite	Pico Viejo H	PVH	EMPA	58.781	25.4065	0.025019	6.98649	0.473562	0.405671	0.219027	6.94344	0.726442		0	0.183554	100.151	58.6925	25.3683	0.0249814	6.97598	0.472849	0.405061	0.218697	6.93299	0.725349	0	0	0.183278	100
ODG-18A	10.58052/IEODG000P	211	microlite	Pico Viejo H	PVH	EMPA	58.4329	24.8841	0.028965	6.69482	0.401079	0.390129	0.201927	6.92183	0.914242		0	0.157946	99.0279	59.0065	25.1284	0.0292493	6.76054	0.405016	0.393959	0.203909	6.98977	0.923216	0	0	0.159496	100
ODG-18A	10.58052/IEODG000P	212	core	Pico Viejo H	PVH	EMPA	51.9365	30.1551	0.038963	12.7068	0.376539	0.33054	0	4.09136	0.267366		0	0.129675	100.033	51.9194	30.1452	0.0389502	12.7026	0.376415	0.330431	0	4.09002	0.267278	0	0	0.129632	100
ODG-18A	10.58052/IEODG000P	213	core	Pico Viejo H	PVH	EMPA	53.7534	28.4898	0.040558	10.9197	0.328656	0.338938	0.056366	5.02803	0.404387		0	0.167058	99.5269	54.0089	28.6252	0.0407508	10.9716	0.330218	0.340549	0.0566339	5.05193	0.406309	0	0	0.167852	100
ODG-18A	10.58052/IEODG000P	214	core	Pico Viejo H	PVH	EMPA	55.3431	27.5891	0.05496	9.76774	0.364836	0.367427	0.086643	5.59767	0.455478		0	0.157334	99.7843	55.4627	27.6487	0.0550788	9.78886	0.365625	0.368221	0.0868303	5.60977	0.456463	0	0	0.157674	100
ODG-18A	10.58052/IEODG000P	215	outer rim	Pico Viejo H	PVH	EMPA	55.8519	27.4253	0.045853	9.42867	0.381029	0.378112	0.086743	5.74519	0.579964		0	0.140967	100.064	55.8163	27.4078	0.0458238	9.42267	0.380786	0.377871	0.0866878	5.74153	0.579595	0	0	0.140877	100
ODG-18A	10.58052/IEODG000P	216	core	Pico Viejo H	PVH	EMPA	55.744	27.3708	0.037242	9.36217	0.403773	0.365464	0.089168	5.82628	0.545771		0	0.166561	99.9112	55.7935	27.3951	0.0372751	9.37049	0.404132	0.365789	0.0892472	5.83146	0.546256	0	0	0.166709	100
ODG-18A	10.58052/IEODG000P	217	core	Pico Viejo H	PVH	EMPA	55.6683	27.5311	0.035462	9.55089	0.409562	0.389449	0.081312	5.67352	0.533968		0	0.152559	100.026	55.6538	27.5239	0.0354527	9.5484	0.409455	0.389347	0.0812908	5.67204	0.533829	0	0	0.152519	100
ODG-18A	10.58052/IEODG000P	218	core	Pico Viejo H	PVH	EMPA	55.0643	27.6833	0.036025	9.952	0.516645	0.373952	0.078381	5.51713	0.489095		0	0.124374	99.8352	55.1552	27.729	0.0360845	9.96843	0.517498	0.374569	0.0785104	5.52624	0.489902	0	0	0.124579	100
ODG-18A	10.58052/IEODG000P	219	core	Pico Viejo H	PVH	EMPA	57.3282	26.335	0.038087	8.17175	0.400063	0.42874	0.138593	6.41921	0.669522		0	0.151699	100.081	57.2819	26.3137	0.0380562	8.16515	0.39974	0.428394	0.138481	6.41402	0.668981	0	0	0.151576	100
ODG-18A	10.58052/IEODG000P	220	core	Pico Viejo H	PVH	EMPA	55.6546	27.5144	0.039831	9.78498	0.557143	0.425074	0.101313	5.73055	0.457576		0	0.132372	100.398	55.4341	27.4054	0.0396732	9.74621	0.554935	0.42339	0.100912	5.70784	0.455763	0	0	0.131847	100
ODG-18A	10.58052/IEODG000P	221	core	Pico Viejo H	PVH	EMPA	55.8229	27.4959	0.043241	9.47126	0.482765	0.462239	0.102092	5.65017	0.547574		0	0.127012	100.205	55.7086	27.4396	0.0431525	9.45187	0.481777	0.461293	0.101883	5.6386	0.546453	0	0	0.126752	100
ODG-18A	10.58052/IEODG000P	222	outer rim	Pico Viejo H	PVH	EMPA	58.542	25.7738	0.036186	7.41282	0.366774	0.421279	0.169135	6.7785	0.720057		0	0.146402	100.367	58.328	25.6796	0.0360537	7.38572	0.365433	0.419739	0.168517	6.75372	0.717424	0	0	0.145867	100
ODG-18A	10.58052/IEODG000P	223	core	Pico Viejo H	PVH	EMPA	55.2505	27.6412	0.041966	9.82135	0.582883	0.415922	0.086013	5.66936	0.405877		0	0.13053	100.046	55.2253	27.6286	0.0419469	9.81687	0.582617	0.415732	0.0859738	5.66678	0.405692	0	0	0.130471	100
ODG-18A	10.58052/IEODG000P	224	outer rim	Pico Viejo H	PVH	EMPA	58.2668	25.6335	0.024172	7.42946	0.543995	0.422371	0.167056	6.79371	0.767802		0.030979	0.156065	100.236	58.1297	25.5732	0.0241151	7.41197	0.542715	0.421377	0.166663	6.77772	0.765995	0	0.0309061	0.155698	100
ODG-18A	10.58052/IEODG000P	225	core	Pico Viejo H	PVH	EMPA	55.4644	27.7207	0.038867	9.9238	0.384235	0.340623	0.083587	5.48525	0.510088		0	0.148997	100.101	55.4087	27.6929	0.038828	9.91383	0.383849	0.340281	0.083503	5.47974	0.509576	0	0	0.148847	100
ODG-18A	10.58052/IEODG000P	226	core	Pico Viejo H	PVH	EMPA	56.4899	26.8522	0.046551	8.81189	0.413512	0.370731	0.120194	5.99783	0.602614		0	0.16842	99.8738	56.5613	26.8861	0.0466098	8.82302	0.414034	0.371199	0.120346	6.00541	0.603375	0	0	0.168633	100
ODG-18A	10.58052/IEODG000P	227	core	Pico Viejo H	PVH	EMPA	55.9927	27.3753	0.05245	9.39023	0.392451	0.331493	0.102896	5.7522	0.556123		0	0.154475	100.1	55.9366	27.3479	0.0523974	9.38082	0.392058	0.331161	0.102793	5.74644	0.555566	0	0	0.15432	100
ODG-18A	10.58052/IEODG000P	228	core	Pico Viejo H	PVH	EMPA	54.6436	28.0029	0.047027	10.3034	0.354872	0.387587	0.081657	5.35856	0.410594		0.031109	0.148537	99.7698	54.7697	28.0675	0.0471355	10.3272	0.355691	0.388481	0.0818454	5.37092	0.411541	0	0.0311808	0.14888	100
ODG-18A	10.58052/IEODG000P	229	core	Pico Viejo H	PVH	EMPA	55.4668	27.4904	0.047419	9.59656	0.385405	0.361341	0.089138	5.78369	0.426897		0	0.158254	99.8059	55.5747	27.5439	0.0475112	9.61522	0.386155	0.362044	0.0893113	5.79494	0.427727	0	0	0.158562	100
ODG-18A	10.58052/IEODG000P	230	core	Pico Viejo H	PVH	EMPA	54.8487	27.8874	0.052757	10.0304	0.42685	0.337469	0.087329	5.43836	0.511484		0	0.149099	99.7698	54.9752	27.9517	0.0528787	10.0535	0.427835	0.338247	0.0875305	5.45091	0.512664	0	0	0.149443	100
ODG-18A	10.58052/IEODG000P	231	core	Pico Viejo H	PVH	EMPA	55.3573	27.5965	0.051372	9.76846	0.452639	0.354048	0.07749	5.56126	0.517936		0	0.15995	99.897	55.4144	27.625	0.051425	9.77854	0.453106	0.354413	0.0775699	5.567	0.51847	0	0	0.160115	100
ODG-18A	10.58052/IEODG000P	232	core	Pico Viejo H	PVH	EMPA	55.8019	27.469	0.045023	9.54247	0.374288	0.381613	0.084145	5.68961	0.57386		0	0.157163	100.119	55.7355	27.4363	0.0449695	9.53112	0.373843	0.381159	0.0840449	5.68284	0.573178	0	0	0.156976	100
ODG-18A	10.58052/IEODG000P	233	core	Pico Viejo H	PVH	EMPA	55.6271	27.4673	0.04381	9.62419	0.346406	0.366985	0.078481	5.70446	0.541123		0	0.164673	99.9645	55.6468	27.477	0.0438255	9.62761	0.346529	0.367115	0.0785088	5.70648	0.541315	0	0	0.164731	100
ODG-18A	10.58052/IEODG000P	234	core	Pico Viejo H	PVH	EMPA	54.8247	28.116	0.042944	10.3277	0.37367	0.351903	0.07282	5.27456	0.438501		0	0.139069	99.9619	54.8456	28.1267	0.0429604	10.3316	0.373813	0.352037	0.0728478	5.27657	0.438668	0	0	0.139122	100
ODG-18A	10.58052/IEODG000P	235	core	Pico Viejo H	PVH	EMPA	55.2836	27.7438	0.036383	9.80768	0.387997	0.361258	0.067344	5.57846	0.500587		0	0.172024	99.9391	55.3173	27.7607	0.0364052	9.81365	0.388233	0.361478	0.067385	5.58186	0.500892	0	0	0.172129	100
ODG-18A	10.58052/IEODG000P	236	core	Pico Viejo H	PVH	EMPA	55.6343	27.3337	0.044568	9.5877	0.338461	0.370403	0.08277	5.78955	0.547325		0	0.144485	99.8733	55.7049	27.3684	0.0446246	9.59987	0.338891	0.370873	0.082875	5.7969	0.54802	0	0	0.144668	100
ODG-18A	10.58052/IEODG000P	237	core	Pico Viejo H	PVH	EMPA	55.5113	27.5546	0.040751	9.45169	0.36705	0.405965	0.079799	5.7861	0.539056		0	0.141039	99.8774	55.5795	27.5884	0.040801	9.4633	0.367501	0.406464	0.079897	5.79321	0.539718	0	0	0.141212	100
ODG-18A	10.58052/IEODG000P	238	core	Pico Viejo H	PVH	EMPA	57.7522	26.0429	0.039194	7.9569	0.343051	0.394887	0.12818	6.50946	0.727442		0	0.135073	100.029	57.7353	26.0353	0.0391825	7.95457	0.342951	0.394771	0.128142	6.50755	0.727229	0	0	0.135033	100
ODG-18A	10.58052/IEODG000P	239	core	Pico Viejo H	PVH	EMPA	56.3536	27.0199	0.048366	8.95397	0.384062	0.414125	0.120048	5.95427	0.57566		0	0.12859	99.9526	56.3803	27.0327	0.0483889	8.95822	0.384244	0.414321	0.120105	5.95709	0.575933	0	0	0.128651	100
ODG-18A	10.58052/IEODG000P	240	core	Pico Viejo H	PVH	EMPA	54.5455	27.944	0.047295	10.2593	0.505433	0.416987	0.084784	5.36637	0.449358		0	0.124754	99.7438	54.6856	28.0158	0.0474165	10.2857	0.506731	0.418058	0.0850018	5.38015	0.450512	0	0	0.125074	100
ODG-18A	10.58052/IEODG000P	241	core	Pico Viejo H	PVH	EMPA	55.1489	27.859	0.040596	10.0506	0.49359	0.468205	0.081902	5.49862	0.490723		0	0.112158	100.244	55.0145	27.7911	0.0404971	10.0261	0.492387	0.467064	0.0817024	5.48522	0.489527	0	0	0.111885	100
ODG-18A	10.58052/IEODG000P	242	outer rim	Pico Viejo H	PVH	EMPA	58.3592	25.6174	0.035906	7.32324	0.403865	0.347093	0.171905	6.89859	0.670009		0	0.17242	99.9996	58.3594	25.6175	0.0359061	7.32327	0.403867	0.347094	0.171906	6.89862	0.670011	0	0	0.172421	100
ODG-18A	10.58052/IEODG000P	243	core	Pico Viejo H	PVH	EMPA	54.8998	27.8631	0.036357	10.0387	0.454605	0.454248	0.074814	5.47012	0.462391		0	0.126558	99.8807	54.9654	27.8964	0.0364004	10.0507	0.455148	0.454791	0.0749034	5.47665	0.462943	0	0	0.126709	100
ODG-18A	10.58052/IEODG000P	244	core	Pico Viejo H	PVH	EMPA	55.1434	27.6447	0.047539	9.96188	0.470371	0.533105	0.08672	5.52439	0.50078		0	0.121416	100.034	55.1245	27.6352	0.0475227	9.95846	0.47021	0.532922	0.0866903	5.5225	0.500608	0	0	0.121374	100
ODG-18A	10.58052/IEODG000P	245	core	Pico Viejo H	PVH	EMPA	59.0606	24.9822	0.030859	6.68252	0.378091	0.387328	0.164826	7.04419	0.924533		0	0.156437	99.8116	59.1721	25.0294	0.0309173	6.69513	0.378805	0.388059	0.165137	7.05749	0.926278	0	0	0.156732	100
ODG-18A	10.58052/IEODG000P	246	outer rim	Pico Viejo H	PVH	EMPA	58.904	25.2836	0.024024	6.89494	0.455208	0.345659	0.181334	7.02798	0.986746		0	0.179428	100.283	58.7378	25.2123	0.0239562	6.87549	0.453924	0.344684	0.180822	7.00815	0.983962	0	0	0.178922	100
ODG-18A	10.58052/IEODG000P	247	core	Pico Viejo H	PVH	EMPA	56.3807	26.806	0.044505	8.85078	0.446988	0.478728	0.118779	6.05981	0.525946		0	0.137328	99.8496	56.4656	26.8464	0.0445721	8.86411	0.447661	0.479449	0.118958	6.06894	0.526738	0	0	0.137535	100
ODG-18A	10.58052/IEODG000P	248	core	Pico Viejo H	PVH	EMPA	55.3194	27.5176	0.031884	9.748	0.471144	0.438149	0.096023	5.61334	0.441672		0	0.139307	99.8165	55.4211	27.5682	0.0319426	9.76592	0.47201	0.438954	0.0961995	5.62366	0.442484	0	0	0.139563	100
ODG-18A	10.58052/IEODG000P	249	outer rim	Pico Viejo H	PVH	EMPA	62.2584	22.6952	0.013397	3.6447	0.282916	0.248216	0.581806	8.14152	1.77369		0	0.160412	99.8003	62.383	22.7406	0.0134238	3.65199	0.283482	0.248713	0.58297	8.15781	1.77724	0	0	0.160733	100
ODG-18A	10.58052/IEODG000P	250	microlite	Pico Viejo H	PVH	EMPA	59.1139	24.9471	0.023427	6.46846	0.44512	0.426518	0.235341	7.30498	0.791124		0	0.16727	99.9232	59.1593	24.9663	0.023445	6.47343	0.445462	0.426846	0.235522	7.31059	0.791732	0	0	0.167398	100
ODG-18A	10.58052/IEODG000P	251	microlite	Pico Viejo H	PVH	EMPA	61.8302	23.3947	0.01055	4.4283	0.301568	0.328589	0.468584	8.10634	1.37939		0	0.155258	100.403	61.5817	23.3007	0.0105076	4.4105	0.300356	0.327269	0.466701	8.07376	1.37385	0	0	0.154634	100
ODG-18A	10.58052/IEODG000P	252	microlite	Pico Viejo H	PVH	EMPA	59.5238	24.6956	0.017766	6.14953	0.323325	0.391492	0.239411	7.43797	0.708784		0	0.143363	99.631	59.7442	24.7871	0.0178318	6.1723	0.324522	0.392942	0.240298	7.46551	0.711409	0	0	0.143894	100
ODG-18A	10.58052/IEODG000P	253	core	Pico Viejo H	PVH	EMPA	53.6807	28.68	0.034303	11.0265	0.390371	0.343011	0.035961	4.96696	0.402416		0	0.162416	99.7226	53.83	28.7598	0.0343984	11.0572	0.391457	0.343965	0.036061	4.98077	0.403535	0	0	0.162868	100
ODG-18A	10.58052/IEODG000P	254	core	Pico Viejo H	PVH	EMPA	52.9752	29.443	0.040658	11.6556	0.41764	0.338648	0.043741	4.63407	0.322307		0	0.14328	100.014	52.9677	29.4388	0.0406523	11.654	0.417581	0.3386	0.0437348	4.63341	0.322261	0	0	0.14326	100
ODG-18A	10.58052/IEODG000P	255	core	Pico Viejo H	PVH	EMPA	51.4031	30.3152	0.032724	12.8371	0.370265	0.30677	0.04328	3.955	0.249074		0.033061	0.126247	99.6718	51.5723	30.415	0.0328317	12.8794	0.371484	0.30778	0.0434225	3.96802	0.249894	0	0.0331699	0.126663	100
ODG-18A	10.58052/IEODG000P	256	core	Pico Viejo H	PVH	EMPA	53.6757	29.1841	0.0353	11.4898	0.425642	0.346594	0.052132	4.80696	0.348147		0	0.155795	100.52	53.3979	29.0331	0.0351173	11.4303	0.423439	0.3448	0.0518622	4.78209	0.346345	0	0	0.154989	100
ODG-18A	10.58052/IEODG000P	257	core	Pico Viejo H	PVH	EMPA	53.8246	28.6307	0.041166	11.085	0.393151	0.335444	0.044846	4.89082	0.377755		0	0.155275	99.7788	53.9439	28.6942	0.0412573	11.1096	0.394023	0.336188	0.0449454	4.90166	0.378593	0	0	0.155619	100
ODG-18A	10.58052/IEODG000P	258	core	Pico Viejo H	PVH	EMPA	54.9769	27.5531	0.050735	9.96835	0.406597	0.346203	0.064735	5.51669	0.524354		0	0.150619	99.5583	55.2208	27.6753	0.0509601	10.0126	0.408401	0.347739	0.0650222	5.54117	0.52668	0	0	0.151287	100
ODG-18A	10.58052/IEODG000P	259	core	Pico Viejo H	PVH	EMPA	55.4691	27.6441	0.038835	9.67255	0.383185	0.360187	0.08534	5.69845	0.532278		0	0.138168	100.022	55.4568	27.638	0.0388264	9.6704	0.3831	0.360107	0.0853211	5.69719	0.53216	0	0	0.138137	100
ODG-18A	10.58052/IEODG000P	260	core	Pico Viejo H	PVH	EMPA	57.1741	26.2299	0.051777	8.13601	0.444335	0.375986	0.11916	6.3275	0.811785		0	0.15923	99.8298	57.2716	26.2746	0.0518653	8.14988	0.445093	0.376627	0.119363	6.33829	0.813169	0	0	0.159501	100
ODG-18A	10.58052/IEODG000P	261	core	Pico Viejo H	PVH	EMPA	56.1757	27.2719	0.04506	9.35144	0.385028	0.396618	0.126765	5.8108	0.594355		0	0.12977	100.287	56.0147	27.1937	0.0449309	9.32464	0.383924	0.395481	0.126402	5.79415	0.592652	0	0	0.129398	100
ODG-18A	10.58052/IEODG000P	262	core	Pico Viejo H	PVH	EMPA	55.6848	27.3581	0.046789	9.44436	0.457171	0.393	0.099414	5.71075	0.529827		0	0.135874	99.8601	55.7628	27.3964	0.0468546	9.45759	0.457812	0.393551	0.0995533	5.71875	0.530569	0	0	0.136064	100
ODG-18A	10.58052/IEODG000P	263	core	Pico Viejo H	PVH	EMPA	54.9211	27.743	0.043645	9.95239	0.529862	0.440554	0.096842	5.58081	0.466428		0	0.120389	99.895	54.9788	27.7722	0.0436909	9.96285	0.530419	0.441017	0.0969438	5.58667	0.466918	0	0	0.120516	100
ODG-18A	10.58052/IEODG000P	264	outer rim	Pico Viejo H	PVH	EMPA	56.5642	26.7669	0.048096	8.56615	0.523833	0.416309	0.135441	6.13621	0.535941		0	0.142623	99.8357	56.6573	26.8109	0.0481752	8.58025	0.524695	0.416994	0.135664	6.14631	0.536823	0	0	0.142858	100
ODG-18A	10.58052/IEODG000P	265	outer rim	Pico Viejo H	PVH	EMPA	58.8005	25.2074	0.027269	6.82682	0.502276	0.460868	0.295867	6.93661	0.871997		0	0.184091	100.114	58.7337	25.1788	0.027238	6.81907	0.501706	0.460345	0.295531	6.92873	0.871007	0	0	0.183882	100
ODG-18A	10.58052/IEODG000P	266	core	Pico Viejo H	PVH	EMPA	51.7424	30.4087	0.032768	12.8562	0.413679	0.35072	0.026692	3.9874	0.251888		0	0.126937	100.197	51.6405	30.3488	0.0327034	12.8309	0.412864	0.350029	0.0266394	3.97955	0.251392	0	0	0.126687	100
ODG-18A	10.58052/IEODG000P	267	core	Pico Viejo H	PVH	EMPA	53.7624	28.8804	0.043549	11.1383	0.435548	0.322971	0.049406	4.92273	0.391157		0	0.155464	100.102	53.7077	28.851	0.0435047	11.127	0.435105	0.322642	0.0493557	4.91772	0.390759	0	0	0.155306	100
ODG-18A	10.58052/IEODG000P	268	core	Pico Viejo H	PVH	EMPA	53.2908	29.2376	0.029689	11.6492	0.408383	0.340475	0.052694	4.75303	0.327315		0	0.145997	100.235	53.1658	29.169	0.0296193	11.6219	0.407425	0.339676	0.0525704	4.74188	0.326547	0	0	0.145654	100
ODG-18A	10.58052/IEODG000P	269	core	Pico Viejo H	PVH	EMPA	52.5181	29.6795	0.036786	12.1624	0.410156	0.34943	0.038363	4.32897	0.309844		0	0.134074	99.9676	52.5351	29.6891	0.0367979	12.1663	0.410289	0.349543	0.0383754	4.33037	0.309944	0	0	0.134117	100
ODG-18A	10.58052/IEODG000P	270	core	Pico Viejo H	PVH	EMPA	57.366	26.198	0.026674	8.19657	0.359648	0.392163	0.133689	6.43777	0.721768		0	0.168358	100.001	57.3656	26.1978	0.0266738	8.19652	0.359646	0.39216	0.133688	6.43773	0.721763	0	0	0.168357	100
ODG-18A	10.58052/IEODG000P	271	core	Pico Viejo H	PVH	EMPA	55.0021	27.9037	0.035971	9.99892	0.548931	0.435113	0.100685	5.43559	0.395696		0	0.123232	99.9799	55.0131	27.9093	0.0359782	10.0009	0.549041	0.4352	0.100705	5.43668	0.395775	0	0	0.123257	100
ODG-18A	10.58052/IEODG000P	272	outer rim	Pico Viejo H	PVH	EMPA	61.7453	23.1026	0.018293	4.30329	0.329073	0.331853	0.432973	7.78031	1.73761		0	0.158394	99.9397	61.7826	23.1165	0.018304	4.30589	0.329272	0.332053	0.433234	7.785	1.73866	0	0	0.15849	100
ODG-18A	10.58052/IEODG000P	273	core	Pico Viejo H	PVH	EMPA	57.1847	26.2567	0.033598	7.99986	0.356779	0.382168	0.142014	6.36681	0.69079		0	0.175081	99.5885	57.421	26.3652	0.0337368	8.03292	0.358253	0.383747	0.142601	6.39312	0.693644	0	0	0.175804	100
ODG-18A	10.58052/IEODG000P	274	core	Pico Viejo H	PVH	EMPA	57.0255	26.2184	0.03586	8.50137	0.377128	0.402826	0.137403	6.353	0.671293		0	0.161031	99.8838	57.0918	26.2489	0.0359017	8.51126	0.377567	0.403295	0.137563	6.36039	0.672074	0	0	0.161218	100
ODG-18A	10.58052/IEODG000P	275	outer rim	Pico Viejo H	PVH	EMPA	56.5577	26.9416	0.037942	8.83109	0.478179	0.407211	0.119349	6.17476	0.575348		0	0.132106	100.255	56.4137	26.873	0.0378454	8.8086	0.476961	0.406174	0.119045	6.15904	0.573883	0	0	0.13177	100
ODG-20B	10.58052/IEODG000S	1321	core	Montaña Reventada	revIb	EMPA	62.3339	22.6728	0.015995	3.91177	0.350745	0.266939	0.393357	8.24433	1.5291	0	0	0.073465	99.7924	62.4636	22.72	0.0160283	3.91991	0.351475	0.267494	0.394175	8.26148	1.53228	0	0	0.0736178	100
ODG-20B	10.58052/IEODG000S	1322	core	Montaña Reventada	revIb	EMPA	62.6633	22.5144	0.007621	3.8765	0.341525	0.289761	0.454658	8.25923	1.35497	0	0	0.068486	99.8305	62.7697	22.5526	0.00763394	3.88308	0.342105	0.290253	0.45543	8.27326	1.35727	0	0	0.0686023	100
ODG-20B	10.58052/IEODG000S	1323	core	Montaña Reventada	revIb	EMPA	62.93	22.1658	0	3.27675	0.343067	0.286826	0.573242	8.42524	1.73298	0	0	0.072754	99.8067	63.0519	22.2087	0	3.2831	0.343732	0.287382	0.574352	8.44156	1.73634	0	0	0.0728949	100
ODG-20B	10.58052/IEODG000S	1324	core	Montaña Reventada	revIb	EMPA	63.0342	22.1566	0	3.22315	0.312871	0.265427	0.507037	8.43098	1.747	0	0	0.067447	99.7447	63.1955	22.2133	0	3.2314	0.313672	0.266106	0.508335	8.45256	1.75147	0	0	0.0676196	100
ODG-20B	10.58052/IEODG000S	1325	core	Montaña Reventada	revIb	EMPA	63.2323	22.1534	0.009403	3.22855	0.299969	0.255367	0.51884	8.37893	1.75993	0	0	0.06964	99.9063	63.2916	22.1742	0.00941182	3.23158	0.30025	0.255606	0.519326	8.38679	1.76158	0	0	0.0697053	100
ODG-20B	10.58052/IEODG000S	1326	core	Montaña Reventada	revIb	EMPA	62.4888	22.5395	0.008549	3.7112	0.351267	0.282161	0.439394	8.24703	1.67663	0	0	0.058957	99.8035	62.6118	22.5839	0.00856583	3.71851	0.351959	0.282717	0.440259	8.26327	1.67993	0	0	0.0590731	100
ODG-20B	10.58052/IEODG000S	1327	core	Montaña Reventada	revIb	EMPA	62.5768	22.5812	0.010121	3.6194	0.279567	0.246348	0.405241	8.2006	1.61504	0	0	0.056482	99.5908	62.8339	22.674	0.0101626	3.63427	0.280716	0.24736	0.406906	8.23429	1.62168	0	0	0.0567141	100
ODG-20B	10.58052/IEODG000S	1328	core	Montaña Reventada	revIb	EMPA	62.7292	22.5968	0.010688	3.81488	0.305497	0.226258	0.340463	8.3701	1.40758	0	0	0.058615	99.8601	62.8171	22.6285	0.010703	3.82023	0.305925	0.226575	0.34094	8.38183	1.40955	0	0	0.0586971	100
ODG-20B	10.58052/IEODG000S	1329	core	Montaña Reventada	revIb	EMPA	62.6003	22.8127	0	3.91519	0.327158	0.307711	0.333377	8.32399	1.40573	0	0	0.061935	100.088	62.5452	22.7926	0	3.91174	0.32687	0.30744	0.333084	8.31666	1.40449	0	0	0.0618805	100
ODG-20B	10.58052/IEODG000S	1330	core	Montaña Reventada	revIb	EMPA	62.8582	22.4857	0.011925	3.54782	0.357318	0.319156	0.460455	8.24658	1.71844	0	0	0.066222	100.072	62.8131	22.4696	0.0119164	3.54527	0.357062	0.318927	0.460125	8.24066	1.71721	0	0	0.0661745	100
ODG-20B	10.58052/IEODG000S	1331	core	Montaña Reventada	revIb	EMPA	62.5481	22.3132	0.008263	3.51805	0.344885	0.310013	0.553384	8.18811	1.83572	0	0	0.068315	99.688	62.7438	22.383	0.00828886	3.52906	0.345964	0.310983	0.555116	8.21373	1.84146	0	0	0.0685288	100
ODG-20B	10.58052/IEODG000S	1332	core	Montaña Reventada	revIb	EMPA	64.1128	20.977	0	2.12338	0.298171	0.059653	0.757061	7.85178	3.38615	0	0	0.095753	99.6617	64.3304	21.0482	0	2.13059	0.299183	0.0598555	0.75963	7.87843	3.39764	0	0	0.096078	100
ODG-20B	10.58052/IEODG000S	1333	core	Montaña Reventada	revIb	EMPA	64.5515	20.6338	0.007212	1.65969	0.280258	0.039592	0.844277	7.89305	3.82406	0	0	0.092919	99.8264	64.6638	20.6697	0.00722454	1.66258	0.280745	0.0396609	0.845746	7.90678	3.83071	0	0	0.0930806	100
ODG-20B	10.58052/IEODG000S	1334	core	Montaña Reventada	revIb	EMPA	64.5049	20.9041	0	1.85489	0.316604	0.04633	0.580071	8.05504	3.73249	0	0	0.102898	100.097	64.4422	20.8838	0	1.85309	0.316296	0.046285	0.579507	8.04721	3.72886	0	0	0.102798	100
ODG-20B	10.58052/IEODG000S	1335	core	Montaña Reventada	revIb	EMPA	65.2715	20.2705	0.007596	1.16968	0.2509	0.033665	0.70007	7.85668	4.6025	0	0	0.110231	100.273	65.0936	20.2152	0.0075753	1.16649	0.250216	0.0335732	0.698162	7.83526	4.58995	0	0	0.109931	100
ODG-20B	10.58052/IEODG000S	1336	outer rim	Montaña Reventada	revIb	EMPA	65.5736	20.0392	0	1.09196	0.254962	0	0.290129	7.70729	4.83232	0	0	0.119821	99.9093	65.6331	20.0574	0	1.09295	0.255194	0	0.290392	7.71429	4.83671	0	0	0.11993	100
ODG-20B	10.58052/IEODG000S	1337	outer rim	Montaña Reventada	revIb	EMPA	66.0981	19.6273	0	0.62997	0.28983	0	0.063912	7.27599	5.96909	0	0	0.127523	100.082	66.0441	19.6113	0	0.629456	0.289593	0	0.0638598	7.27005	5.96422	0	0	0.127419	100
ODG-20B	10.58052/IEODG000S	1338	outer rim	Montaña Reventada	revIb	EMPA	66.0304	19.6466	0	0.727979	0.332328	0	0	7.19725	5.96564	0	0	0.158024	100.058	65.992	19.6352	0	0.727555	0.332135	0	0	7.19306	5.96217	0	0	0.157932	100
ODG-20B	10.58052/IEODG000S	1341	microlite	Montaña Reventada	revIb	EMPA	65.9648	19.0935	0	0.3357	0.379828	0	0	6.53018	7.49265	0	0	0.192947	99.9896	65.9717	19.0955	0	0.335735	0.379867	0	0	6.53086	7.49343	0	0	0.192967	100
ODG-20B	10.58052/IEODG000S	1342	microlite	Montaña Reventada	revIb	EMPA	64.6911	20.9163	0	1.90003	0.39156	0	0.533789	7.84489	4.01558	0	0	0.098742	100.392	64.4385	20.8346	0	1.89261	0.390031	0	0.531705	7.81426	3.9999	0	0	0.0983565	100
ODG-20B	10.58052/IEODG000S	1343	microlite	Montaña Reventada	revIb	EMPA	63.903	21.3855	0	2.60431	0.407355	0.08627	0.2844	8.09937	3.03143	0	0	0.145029	99.9467	63.9371	21.3969	0	2.6057	0.407572	0.086316	0.284552	8.10369	3.03305	0	0	0.145106	100
ODG-20B	10.58052/IEODG000S	1344	microlite	Montaña Reventada	revIb	EMPA	63.8087	21.6043	0.014155	2.73475	0.394112	0.081792	0.285697	8.60894	2.28848	0	0	0.140819	99.9617	63.8331	21.6126	0.0141604	2.7358	0.394263	0.0818233	0.285806	8.61223	2.28936	0	0	0.140873	100
ODG-20B	10.58052/IEODG000S	1345	microlite	Montaña Reventada	revIb	EMPA	63.6005	21.4881	0.007596	2.74085	0.41434	0.197299	0.458226	7.9306	2.9774	0	0	0.116205	99.9311	63.6443	21.5029	0.00760124	2.74274	0.414626	0.197435	0.458542	7.93607	2.97945	0	0	0.116285	100
ODG-20B	10.58052/IEODG000S	1346	microlite	Montaña Reventada	revIb	EMPA	65.2122	20.4139	0	1.46579	0.297041	0.022368	0.461698	7.78908	4.36896	0	0	0.104539	100.136	65.1239	20.3863	0	1.46381	0.296639	0.0223377	0.461073	7.77853	4.36304	0	0	0.104397	100
ODG-20B	10.58052/IEODG000S	1347	microlite	Montaña Reventada	revIb	EMPA	64.5142	20.6822	0	1.68076	0.380356	0.028394	0.54413	7.64442	4.46635	0	0.038768	0.138886	100.118	64.4379	20.6577	0	1.67877	0.379906	0.0283604	0.543486	7.63537	4.46107	0	0.0387221	0.138722	100
ODG-20B	10.58052/IEODG000S	1348	microlite	Montaña Reventada	revIb	EMPA	64.4929	20.9057	0	1.75489	0.314114	0.112887	0.700659	8.00999	3.79167	0	0	0.112328	100.195	64.3673	20.865	0	1.75147	0.313502	0.112667	0.699294	7.99439	3.78429	0	0	0.112109	100
ODG-20B	10.58052/IEODG000S	1349	microlite	Montaña Reventada	revIb	EMPA	65.0771	20.4329	0	1.52192	0.348594	0	0.143076	7.98439	4.25273	0	0	0.131164	99.8919	65.1475	20.455	0	1.52357	0.348971	0	0.143231	7.99303	4.25733	0	0	0.131306	100
ODG-20B	10.58052/IEODG000S	1350	core	Montaña Reventada	revIb	EMPA	65.7712	20.2259	0	1.18596	0.231148	0	0.252186	8.36397	3.88767	0	0	0.076528	99.9946	65.7748	20.227	0	1.18602	0.231161	0	0.2522	8.36442	3.88788	0	0	0.0765322	100
ODG-20B	10.58052/IEODG000S	1351	core	Montaña Reventada	revIb	EMPA	64.5823	20.8624	0	1.8798	0.29118	0.0365	0.842528	8.17298	3.30123	0	0	0.074365	100.043	64.5544	20.8534	0	1.87899	0.291054	0.0364842	0.842163	8.16944	3.2998	0	0	0.0743328	100
ODG-20B	10.58052/IEODG000S	1352	core	Montaña Reventada	revIb	EMPA	64.4613	20.8887	0.011506	1.90393	0.253779	0.021595	0.858416	8.12435	3.20583	0	0	0.072497	99.8019	64.5892	20.9302	0.0115288	1.90771	0.254283	0.0216379	0.86012	8.14048	3.21219	0	0	0.0726409	100
ODG-20B	10.58052/IEODG000S	1353	core	Montaña Reventada	revIb	EMPA	64.7325	20.5538	0	1.75792	0.249603	0.020777	0.673394	8.29673	3.32897	0	0	0.072	99.6857	64.9366	20.6186	0	1.76346	0.25039	0.0208425	0.675517	8.32289	3.33947	0	0	0.072227	100
ODG-20B	10.58052/IEODG000S	1354	core	Montaña Reventada	revIb	EMPA	64.8487	20.365	0	1.45875	0.27813	0	0.620169	8.29489	3.73137	0	0	0.071172	99.6682	65.0646	20.4328	0	1.46361	0.279056	0	0.622234	8.32251	3.74379	0	0	0.0714089	100
ODG-20B	10.58052/IEODG000S	1355	core	Montaña Reventada	revIb	EMPA	64.7377	20.5414	0	1.60809	0.305659	0	0.663351	8.12929	3.68557	0	0	0.071309	99.7424	64.9049	20.5945	0	1.61224	0.306449	0	0.665064	8.15029	3.69509	0	0	0.0714932	100
ODG-20B	10.58052/IEODG000S	1356	core	Montaña Reventada	revIb	EMPA	64.2966	20.7923	0	1.94974	0.25859	0.029862	0.822204	8.1155	3.35443	0	0	0.075492	99.6947	64.4935	20.856	0	1.95571	0.259382	0.0299534	0.824722	8.14035	3.3647	0	0	0.0757232	100
ODG-20B	10.58052/IEODG000S	1357	core	Montaña Reventada	revIb	EMPA	65.2364	20.2692	0	1.3027	0.195424	0.020695	0.528201	8.20315	3.85989	0	0	0.06739	99.6831	65.4438	20.3336	0	1.30684	0.196045	0.0207608	0.52988	8.22923	3.87216	0	0	0.0676043	100
ODG-20B	10.58052/IEODG000S	1358	core	Montaña Reventada	revIb	EMPA	64.7027	20.7837	0	1.69647	0.246417	0.024251	0.677922	8.27044	3.43011	0	0	0.074371	99.9064	64.7633	20.8032	0	1.69806	0.246648	0.0242737	0.678557	8.27819	3.43332	0	0	0.0744407	100
ODG-20B	10.58052/IEODG000S	1359	core	Montaña Reventada	revIb	EMPA	64.4783	20.6428	0	1.70286	0.215329	0.033783	0.769401	8.11202	3.55447	0	0	0.069414	99.5784	64.7513	20.7302	0	1.71007	0.216241	0.033926	0.772659	8.14637	3.56952	0	0	0.0697079	100
ODG-20B	10.58052/IEODG000S	1360	core	Montaña Reventada	revIb	EMPA	64.1786	20.9797	0	2.05289	0.256651	0.019747	0.833421	8.00627	3.299	0	0	0.076718	99.703	64.3698	21.0422	0	2.05901	0.257416	0.0198058	0.835904	8.03012	3.30883	0	0	0.0769465	100
ODG-20B	10.58052/IEODG000S	1361	core	Montaña Reventada	revIb	EMPA	64.3212	20.5188	0	1.66857	0.329316	0.099469	0.844036	7.87353	3.7617	0	0	0.109415	99.526	64.6275	20.6165	0	1.67652	0.330884	0.0999427	0.848055	7.91103	3.77961	0	0	0.109936	100
ODG-20B	10.58052/IEODG000S	1362	core	Montaña Reventada	revIb	EMPA	65.8447	19.8066	0.009041	0.963588	0.291049	0	0.112572	7.77227	5.02709	0	0	0.139303	99.9662	65.867	19.8133	0.00904406	0.963914	0.291147	0	0.11261	7.7749	5.02879	0	0	0.13935	100
ODG-20B	10.58052/IEODG000S	1363	outer rim	Montaña Reventada	revIb	EMPA	65.7716	19.0594	0	0.309761	0.293531	0.021305	0.029811	6.26261	7.63123	0	0	0.14054	99.5198	66.089	19.1514	0	0.311256	0.294947	0.0214078	0.0299548	6.29283	7.66805	0	0	0.141218	100
ODG-20B	10.58052/IEODG000S	1364	core	Montaña Reventada	revIb	EMPA	64.0805	21.257	0	2.1105	0.229874	0.061523	0.888928	8.203	3.04093	0	0	0.078829	99.9511	64.1119	21.2674	0	2.11153	0.229987	0.0615531	0.889363	8.20701	3.04242	0	0	0.0788676	100
ODG-20B	10.58052/IEODG000S	1365	core	Montaña Reventada	revIb	EMPA	63.8695	21.1253	0	2.17452	0.261229	0.050461	0.931389	8.07089	3.05188	0	0	0.074126	99.6093	64.12	21.2082	0	2.18305	0.262254	0.0506589	0.935042	8.10255	3.06385	0	0	0.0744167	100
ODG-20B	10.58052/IEODG000S	1366	core	Montaña Reventada	revIb	EMPA	63.9201	21.1836	0	2.19808	0.254456	0.04714	0.89203	8.33707	3.0883	0	0	0.073639	99.9944	63.9237	21.1848	0	2.1982	0.25447	0.0471426	0.89208	8.33754	3.08847	0	0	0.0736431	100
ODG-20B	10.58052/IEODG000S	1367	core	Montaña Reventada	revIb	EMPA	63.9551	21.166	0	2.20607	0.262379	0.034611	0.887783	8.19957	3.10116	0	0	0.080339	99.893	64.0236	21.1887	0	2.20843	0.26266	0.0346481	0.888734	8.20835	3.10448	0	0	0.080425	100
ODG-20B	10.58052/IEODG000S	1368	core	Montaña Reventada	revIb	EMPA	64.0734	21.1253	0	2.08096	0.232599	0.073054	0.951663	8.18415	3.08366	0	0	0.07735	99.8821	64.149	21.1502	0	2.08342	0.232873	0.0731402	0.952786	8.19381	3.0873	0	0	0.0774413	100
ODG-20B	10.58052/IEODG000S	1369	core	Montaña Reventada	revIb	EMPA	63.6098	21.1933	0.009321	2.34883	0.264459	0.024796	0.874444	8.21162	2.84105	0	0	0.07726	99.4549	63.9585	21.3095	0.00937209	2.3617	0.265909	0.0249319	0.879237	8.25663	2.85662	0	0	0.0776835	100
ODG-20B	10.58052/IEODG000S	1370	core	Montaña Reventada	revIb	EMPA	63.5289	21.1955	0.007057	2.27909	0.244594	0.042105	0.8974	8.27816	2.97135	0	0	0.072167	99.5163	63.8377	21.2985	0.0070913	2.29017	0.245783	0.0423096	0.901762	8.31839	2.98579	0	0	0.0725178	100
ODG-20B	10.58052/IEODG000S	1371	core	Montaña Reventada	revIb	EMPA	64.0686	20.9172	0	1.96887	0.257531	0.026139	0.858739	8.26646	3.22734	0	0	0.077245	99.6681	64.2819	20.9869	0	1.97543	0.258389	0.026226	0.861598	8.29399	3.23809	0	0	0.0775022	100
ODG-20B	10.58052/IEODG000S	1372	core	Montaña Reventada	revIb	EMPA	64.4068	20.9393	0	1.87424	0.281856	0.054453	0.946265	8.13692	3.36005	0	0	0.079718	100.08	64.3556	20.9226	0	1.87275	0.281632	0.0544097	0.945512	8.13045	3.35738	0	0	0.0796546	100
ODG-20B	10.58052/IEODG000S	1373	core	Montaña Reventada	revIb	EMPA	64.1301	20.8599	0	1.81716	0.294071	0.035588	0.878182	8.07825	3.38603	0	0	0.072581	99.5519	64.4188	20.9538	0	1.82534	0.295395	0.0357482	0.882135	8.11461	3.40127	0	0	0.0729077	100
ODG-20B	10.58052/IEODG000S	1374	core	Montaña Reventada	revIb	EMPA	64.5764	20.9191	0	1.81065	0.225138	0	0.863438	8.21629	3.39581	0	0	0.069754	100.077	64.527	20.9031	0	1.80926	0.224966	0	0.862777	8.21	3.39321	0	0	0.0697006	100
ODG-20B	10.58052/IEODG000S	1375	core	Montaña Reventada	revIb	EMPA	64.297	20.757	0	1.79133	0.280348	0.051213	0.835077	8.06329	3.35648	0	0	0.068304	99.5	64.6201	20.8613	0	1.80033	0.281757	0.0514703	0.839273	8.10381	3.37335	0	0	0.0686472	100
ODG-20B	10.58052/IEODG000S	1376	core	Montaña Reventada	revIb	EMPA	64.834	20.5068	0	1.48776	0.275574	0	0.598052	7.79144	4.4523	0	0	0.123448	100.069	64.7891	20.4926	0	1.48673	0.275383	0	0.597637	7.78604	4.44921	0	0	0.123362	100
ODG-20B	10.58052/IEODG000S	1378	core	Montaña Reventada	revIb	EMPA	65.1745	20.2273	0	1.4072	0.321494	0	0.213342	7.73748	4.59637	0	0	0.116967	99.7947	65.3086	20.2689	0	1.4101	0.322156	0	0.213781	7.7534	4.60583	0	0	0.117208	100
ODG-20B	10.58052/IEODG000S	1379	outer rim	Montaña Reventada	revIb	EMPA	65.9326	19.6969	0	0.79037	0.300443	0	0.153769	7.56422	5.54046	0	0	0.118059	100.097	65.8688	19.6778	0	0.789605	0.300152	0	0.15362	7.5569	5.5351	0	0	0.117945	100
ODG-20B	10.58052/IEODG000S	1380	outer rim	Montaña Reventada	revIb	EMPA	65.6029	18.6783	0	0.185055	0.470272	0	0.035112	5.55631	8.8569	0	0	0.174279	99.5591	65.8934	18.761	0	0.185874	0.472354	0	0.0352675	5.58091	8.89612	0	0	0.175051	100
ODG-20B	10.58052/IEODG000S	1381	microlite	Montaña Reventada	revIb	EMPA	64.4507	20.9359	0	1.97705	0.366568	0.025989	0.397432	8.08972	3.58398	0	0	0.103475	99.9308	64.4953	20.9504	0	1.97842	0.366822	0.026007	0.397707	8.09532	3.58646	0	0	0.103547	100
ODG-20B	10.58052/IEODG000S	1382	microlite	Montaña Reventada	revIb	EMPA	64.0718	20.9533	0.006992	2.01275	0.368432	0.11047	0.580253	7.92893	3.8861	0	0	0.125548	100.045	64.0433	20.944	0.00698888	2.01185	0.368268	0.110421	0.579994	7.9254	3.88437	0	0	0.125492	100
ODG-20B	10.58052/IEODG000S	1383	microlite	Montaña Reventada	revIb	EMPA	63.6574	21.2756	0	2.41233	0.428086	0.043344	0.554421	8.04914	3.27312	0	0	0.102454	99.7959	63.7876	21.3191	0	2.41726	0.428962	0.0434326	0.555555	8.0656	3.27981	0	0	0.102664	100
ODG-20B	10.58052/IEODG000S	1384	microlite	Montaña Reventada	revIb	EMPA	64.0743	20.8911	0	2.01234	0.390942	0.034045	0.706733	7.96891	3.7594	0	0	0.108606	99.9464	64.1087	20.9023	0	2.01342	0.391152	0.0340633	0.707112	7.97319	3.76142	0	0	0.108664	100
ODG-20B	10.58052/IEODG000S	1385	microlite	Montaña Reventada	revIb	EMPA	64.7482	20.9481	0	1.89235	0.373755	0.032605	0.130966	8.4831	3.25363	0	0	0.113816	99.9765	64.7634	20.953	0	1.89279	0.373843	0.0326127	0.130997	8.48509	3.25439	0	0	0.113843	100
ODG-20B	10.58052/IEODG000S	1386	microlite	Montaña Reventada	revIb	EMPA	65.5955	20.3003	0.009553	1.45056	0.383896	0	0.065121	8.43422	3.74474	0	0	0.134272	100.118	65.5181	20.2763	0.00954173	1.44885	0.383443	0	0.0650441	8.42427	3.74032	0	0	0.134114	100
ODG-20B	10.58052/IEODG000S	1387	core	Montaña Reventada	revIb	EMPA	60.2023	24.0537	0.01572	5.60844	0.421998	0.379308	0.237835	7.58353	0.970173	0	0	0.063648	99.5367	60.4825	24.1657	0.0157932	5.63455	0.423962	0.381074	0.238942	7.61883	0.974689	0	0	0.0639443	100
ODG-20B	10.58052/IEODG000S	1388	core	Montaña Reventada	revIb	EMPA	60.5561	24.0684	0.010643	5.34842	0.326498	0.366795	0.24909	7.83971	0.997501	0	0	0.063305	99.8265	60.6614	24.1102	0.0106615	5.35772	0.327066	0.367433	0.249523	7.85334	0.999235	0	0	0.063415	100
ODG-20B	10.58052/IEODG000S	1389	core	Montaña Reventada	revIb	EMPA	60.4307	24.0366	0.011786	5.38883	0.36106	0.34601	0.229191	7.84212	1.012	0	0	0.066111	99.7244	60.5977	24.103	0.0118186	5.40372	0.362058	0.346966	0.229824	7.86379	1.0148	0	0	0.0662937	100
ODG-20B	10.58052/IEODG000S	1390	core	Montaña Reventada	revIb	EMPA	60.7734	23.9122	0.009985	5.34161	0.353075	0.345257	0.237215	7.86786	1.0363	0	0	0.053775	99.9307	60.8156	23.9288	0.00999193	5.34532	0.35332	0.345497	0.23738	7.87332	1.03702	0	0	0.0538123	100
ODG-20B	10.58052/IEODG000S	1391	core	Montaña Reventada	revIb	EMPA	61.202	23.6206	0.0084	4.92717	0.341413	0.355755	0.269066	8.03205	1.10204	0	0	0.061008	99.9195	61.2513	23.6396	0.00840677	4.93114	0.341688	0.356042	0.269283	8.03852	1.10293	0	0	0.0610571	100
ODG-20B	10.58052/IEODG000S	1392	core	Montaña Reventada	revIb	EMPA	61.2803	23.5718	0.009554	4.82991	0.333631	0.341179	0.2977	8.01605	1.13288	0	0	0.060862	99.8739	61.3577	23.6016	0.00956607	4.83601	0.334052	0.34161	0.298076	8.02617	1.13431	0	0	0.0609389	100
ODG-20B	10.58052/IEODG000S	1393	core	Montaña Reventada	revIb	EMPA	61.2136	23.5301	0.013306	4.8416	0.363126	0.319424	0.285099	7.97598	1.21864	0	0	0.05989	99.8208	61.3235	23.5723	0.0133299	4.85029	0.363778	0.319998	0.285611	7.9903	1.22083	0	0	0.0599975	100
ODG-20B	10.58052/IEODG000S	1394	core	Montaña Reventada	revIb	EMPA	64.3594	21.0028	0	2.17272	0.361209	0.085469	0.365035	8.69322	2.65921	0	0	0.094875	99.7939	64.4923	21.0462	0	2.17721	0.361955	0.0856455	0.365789	8.71117	2.6647	0	0	0.0950709	100
ODG-20B	10.58052/IEODG000S	1395	core	Montaña Reventada	revIb	EMPA	64.6531	20.7523	0	1.92198	0.339651	0.055291	0.325544	8.524	2.91966	0	0	0.08999	99.5815	64.9248	20.8395	0	1.93006	0.341078	0.0555234	0.326912	8.55982	2.93193	0	0	0.0903682	100
ODG-20B	10.58052/IEODG000S	1396	core	Montaña Reventada	revIb	EMPA	64.8436	20.8099	0	1.81087	0.316013	0.066085	0.255658	8.52298	3.12309	0	0	0.093003	99.8412	64.9467	20.843	0	1.81375	0.316516	0.0661901	0.256065	8.53654	3.12806	0	0	0.0931509	100
ODG-20B	10.58052/IEODG000S	1397	core	Montaña Reventada	revIb	EMPA	64.6721	20.7113	0.011606	1.93638	0.338113	0.075368	0.332729	8.32125	3.38375	0	0	0.096471	99.8791	64.7504	20.7364	0.0116201	1.93872	0.338522	0.0754593	0.333132	8.33133	3.38785	0	0	0.0965878	100
ODG-20B	10.58052/IEODG000S	1398	core	Montaña Reventada	revIb	EMPA	63.8124	21.1787	0	2.35023	0.311228	0.114846	0.634656	8.17048	3.05729	0	0	0.100219	99.73	63.9851	21.236	0	2.35659	0.31207	0.115157	0.636374	8.1926	3.06557	0	0	0.10049	100
ODG-20B	10.58052/IEODG000S	1399	core	Montaña Reventada	revIb	EMPA	63.7825	21.1807	0.008934	2.48951	0.335711	0.068531	0.522052	8.35584	2.65111	0	0	0.090729	99.4856	64.1123	21.2902	0.00898019	2.50238	0.337447	0.0688853	0.524751	8.39904	2.66482	0	0	0.0911981	100
ODG-20B	10.58052/IEODG000S	1400	core	Montaña Reventada	revIb	EMPA	64.4505	20.9976	0	2.02366	0.330239	0.041507	0.396699	8.30046	3.1415	0	0	0.093572	99.7757	64.5954	21.0448	0	2.02821	0.330981	0.0416003	0.397591	8.31912	3.14856	0	0	0.0937823	100
ODG-20B	10.58052/IEODG000S	1401	core	Montaña Reventada	revIb	EMPA	64.4412	21.04	0.011176	2.09326	0.349422	0.055702	0.532113	8.22671	3.20971	0	0	0.11596	100.075	64.3927	21.0242	0.0111676	2.09169	0.349159	0.0556601	0.531713	8.22052	3.2073	0	0	0.115873	100
ODG-20B	10.58052/IEODG000S	1402	core	Montaña Reventada	revIb	EMPA	65.0372	20.6881	0.012198	1.86862	0.360571	0	0.250858	8.37312	3.35366	0	0	0.113671	100.058	64.9995	20.6761	0.0121909	1.86754	0.360362	0	0.250713	8.36827	3.35172	0	0	0.113605	100
ODG-20B	10.58052/IEODG000S	1403	outer rim	Montaña Reventada	revIb	EMPA	65.2637	20.3193	0.008056	1.34578	0.512456	0.035815	0.108824	8.4789	3.58984	0	0	0.179156	99.8418	65.3671	20.3515	0.00806876	1.34791	0.513268	0.0358717	0.108996	8.49233	3.59553	0	0	0.17944	100
ODG-20B	10.58052/IEODG000S	1404	microlite	Montaña Reventada	revIb	EMPA	63.8176	21.2879	0	2.61864	0.351341	0.025834	0.286048	8.14843	3.03355	0	0	0.093876	99.6632	64.0333	21.3598	0	2.62749	0.352528	0.0259213	0.287015	8.17597	3.0438	0	0	0.0941932	100
ODG-37A	10.58052/IEODG001B	793	core	Arenas Blancas	ab	EMPA	64.532	20.6999	0	1.68916	0.29654	0.034011	0.853171	8.01817	3.72933	0	0	0.081907	99.9342	64.5745	20.7135	0	1.69027	0.296735	0.0340334	0.853733	8.02345	3.73179	0	0	0.0819609	100
ODG-37A	10.58052/IEODG001B	794	core	Arenas Blancas	ab	EMPA	64.4353	20.9578	0	1.87186	0.312403	0.06815	0.822852	7.96856	3.60473	0	0	0.091151	100.133	64.3498	20.93	0	1.86938	0.311989	0.0680596	0.821761	7.95799	3.59995	0	0	0.0910301	100
ODG-37A	10.58052/IEODG001B	795	core	Arenas Blancas	ab	EMPA	64.6418	20.9526	0	1.86244	0.306272	0.049551	0.644571	7.94283	3.53002	0	0	0.093546	100.024	64.6265	20.9477	0	1.862	0.3062	0.0495393	0.644419	7.94095	3.52919	0	0	0.0935239	100
ODG-37A	10.58052/IEODG001B	796	core	Arenas Blancas	ab	EMPA	65.0095	20.7212	0	1.6074	0.29179	0.027776	0.543579	8.10686	3.71052	0	0	0.080915	100.1	64.9449	20.7006	0	1.6058	0.2915	0.0277484	0.543038	8.0988	3.70683	0	0	0.0808345	100
ODG-37A	10.58052/IEODG001B	797	core	Arenas Blancas	ab	EMPA	64.9319	20.5432	0	1.53834	0.265595	0.055978	0.60397	8.1598	3.78733	0	0	0.078446	99.9646	64.9549	20.5505	0	1.53889	0.265689	0.0559978	0.604184	8.16269	3.78867	0	0	0.0784738	100
ODG-37A	10.58052/IEODG001B	798	core	Arenas Blancas	ab	EMPA	64.922	20.6613	0	1.51964	0.303659	0.044394	0.503427	8.13899	3.82195	0	0	0.084523	99.9999	64.9221	20.6613	0	1.51964	0.303659	0.0443941	0.503428	8.139	3.82195	0	0	0.0845231	100
ODG-37A	10.58052/IEODG001B	799	core	Arenas Blancas	ab	EMPA	65.1498	20.4134	0	1.4248	0.291878	0.046054	0.475292	8.06046	3.9366	0	0	0.072287	99.8706	65.2342	20.4399	0	1.42665	0.292256	0.0461137	0.475908	8.07091	3.9417	0	0	0.0723807	100
ODG-37A	10.58052/IEODG001B	800	core	Arenas Blancas	ab	EMPA	65.4599	20.3298	0	1.35331	0.27295	0.023546	0.488732	8.09509	3.98735	0	0	0.086503	100.097	65.3963	20.3101	0	1.352	0.272685	0.0235231	0.488258	8.08723	3.98348	0	0	0.086419	100
ODG-37A	10.58052/IEODG001B	801	outer rim	Arenas Blancas	ab	EMPA	65.1328	20.5907	0	1.49745	0.255223	0.026255	0.434909	8.17797	3.88951	0	0	0.088228	100.093	65.0723	20.5716	0	1.49606	0.254986	0.0262306	0.434505	8.17037	3.88589	0	0	0.088146	100
ODG-37A	10.58052/IEODG001B	802	outer rim	Arenas Blancas	ab	EMPA	65.6553	20.2193	0	1.1465	0.303268	0.018704	0.556058	7.88897	4.49248	0	0	0.094049	100.375	65.4103	20.1438	0	1.14222	0.302136	0.0186342	0.553983	7.85953	4.47571	0	0	0.093698	100
ODG-37A	10.58052/IEODG001B	803	core	Arenas Blancas	ab	EMPA	65.0037	20.5536	0	1.47772	0.320491	0.056123	0.781731	7.92385	3.96354	0	0	0.103328	100.184	64.8843	20.5158	0	1.475	0.319902	0.0560199	0.780295	7.90929	3.95626	0	0	0.103138	100
ODG-37A	10.58052/IEODG001B	804	core	Arenas Blancas	ab	EMPA	64.5929	20.4903	0	1.47452	0.293564	0.028972	0.823339	8.09355	3.96047	0	0	0.104439	99.8621	64.6821	20.5186	0	1.47656	0.29397	0.029012	0.824476	8.10473	3.96594	0	0	0.104583	100
ODG-37A	10.58052/IEODG001B	805	core	Arenas Blancas	ab	EMPA	65.0411	20.5549	0	1.46905	0.320147	0.059894	0.602765	8.12492	3.89043	0	0	0.083055	100.146	64.9461	20.5249	0	1.4669	0.319679	0.0598065	0.601885	8.11305	3.88475	0	0	0.0829337	100
ODG-37A	10.58052/IEODG001B	806	core	Arenas Blancas	ab	EMPA	64.5271	20.6958	0	1.73413	0.332924	0.052915	0.653593	8.07363	3.74115	0	0	0.094352	99.9056	64.5881	20.7154	0	1.73577	0.333239	0.052965	0.654211	8.08126	3.74469	0	0	0.0944412	100
ODG-37A	10.58052/IEODG001B	807	core	Arenas Blancas	ab	EMPA	65.074	20.6684	0.006946	1.56119	0.312688	0.059672	0.722645	8.06226	3.93502	0	0	0.087464	100.49	64.7565	20.5676	0.00691211	1.55357	0.311162	0.0593809	0.719119	8.02292	3.91582	0	0	0.0870373	100
ODG-37A	10.58052/IEODG001B	808	core	Arenas Blancas	ab	EMPA	65.6737	19.9254	0	0.865039	0.22224	0.041965	0.302689	7.77783	4.98313	0	0	0.063587	99.8556	65.7687	19.9542	0	0.86629	0.222561	0.0420257	0.303127	7.78908	4.99034	0	0	0.063679	100
ODG-37A	10.58052/IEODG001B	809	core	Arenas Blancas	ab	EMPA	64.5236	20.8721	0.013958	1.6383	0.280718	0.090111	0.750178	7.99784	3.94301	0	0	0.101143	100.211	64.3878	20.8282	0.0139286	1.63485	0.280127	0.0899213	0.748599	7.981	3.93471	0	0	0.10093	100
ODG-37A	10.58052/IEODG001B	810	core	Arenas Blancas	ab	EMPA	64.626	20.6067	0	1.41863	0.27364	0.054042	1.09204	7.87941	4.13306	0	0	0.102905	100.186	64.5057	20.5684	0	1.41599	0.273131	0.0539414	1.09001	7.86475	4.12537	0	0	0.102714	100
ODG-37A	10.58052/IEODG001B	812	core	Arenas Blancas	ab	EMPA	65.4538	20.2479	0.006822	1.19579	0.283403	0	0.282217	7.95417	4.29596	0	0.032196	0.083275	99.8355	65.5616	20.2813	0.00683324	1.19776	0.28387	0	0.282682	7.96727	4.30304	0	0.032249	0.0834122	100
ODG-37A	10.58052/IEODG001B	813	core	Arenas Blancas	ab	EMPA	65.9217	20.1067	0	1.01662	0.26654	0	0.278638	7.95032	4.50885	0	0	0.093254	100.143	65.8278	20.0781	0	1.01517	0.26616	0	0.278241	7.939	4.50243	0	0	0.0931212	100
ODG-37A	10.58052/IEODG001B	814	core	Arenas Blancas	ab	EMPA	65.7028	19.9852	0	1.0549	0.290143	0	0.380176	8.0596	4.3008	0	0	0.110746	99.8844	65.7789	20.0083	0	1.05612	0.290479	0	0.380616	8.06893	4.30578	0	0	0.110874	100
ODG-37A	10.58052/IEODG001B	815	core	Arenas Blancas	ab	EMPA	66.083	19.819	0	0.726714	0.317269	0	0.465924	7.58295	5.24	0	0	0.082123	100.317	65.8742	19.7564	0	0.724418	0.316266	0	0.464452	7.55899	5.22344	0	0	0.0818635	100
ODG-37A	10.58052/IEODG001B	816	outer rim	Arenas Blancas	ab	EMPA	66.0204	19.7037	0	0.717576	0.277066	0	0.21736	7.53861	5.3425	0	0	0.081487	99.8987	66.0873	19.7237	0	0.718304	0.277347	0	0.21758	7.54625	5.34792	0	0	0.0815696	100
ODG-37A	10.58052/IEODG001B	817	core	Arenas Blancas	ab	EMPA	66.1438	19.6804	0	0.62216	0.241832	0.025117	0.310705	7.56061	5.54184	0	0	0.080671	100.207	66.0071	19.6397	0	0.620874	0.241332	0.0250651	0.310063	7.54498	5.53038	0	0	0.0805042	100
ODG-37A	10.58052/IEODG001B	818	core	Arenas Blancas	ab	EMPA	66.3013	19.7222	0	0.677064	0.27996	0	0.285292	7.66637	5.27357	0	0	0.076828	100.283	66.1145	19.6666	0	0.675156	0.279171	0	0.284488	7.64477	5.25871	0	0	0.0766115	100
ODG-37A	10.58052/IEODG001B	819	core	Arenas Blancas	ab	EMPA	65.865	19.9052	0	0.796263	0.242228	0	0.280364	7.6987	5.2155	0	0	0.069122	100.072	65.8174	19.8908	0	0.795687	0.242053	0	0.280161	7.69313	5.21173	0	0	0.069072	100
ODG-37A	10.58052/IEODG001B	820	core	Arenas Blancas	ab	EMPA	65.9813	19.9591	0	0.83459	0.252518	0	0.238272	7.88761	4.91688	0	0	0.073183	100.143	65.8868	19.9305	0	0.833394	0.252156	0	0.237931	7.87631	4.90984	0	0	0.0730782	100
ODG-37A	10.58052/IEODG001B	821	outer rim	Arenas Blancas	ab	EMPA	66.2183	19.9683	0	0.906818	0.285302	0	0.240421	7.88696	4.85757	0	0	0.076793	100.44	65.9279	19.8807	0	0.902841	0.284051	0	0.239367	7.85237	4.83627	0	0	0.0764562	100
ODG-37A	10.58052/IEODG001B	822	core	Arenas Blancas	ab	EMPA	64.5959	20.6556	0	1.56453	0.329174	0.04206	0.845273	7.95999	3.9691	0	0	0.086669	100.048	64.5647	20.6456	0	1.56377	0.329015	0.0420397	0.844865	7.95615	3.96718	0	0	0.0866272	100
ODG-37A	10.58052/IEODG001B	823	core	Arenas Blancas	ab	EMPA	64.7823	20.7651	0	1.62793	0.303563	0.029565	0.773832	7.99548	3.87381	0	0	0.085478	100.237	64.6291	20.716	0	1.62408	0.302845	0.0294951	0.772002	7.97657	3.86465	0	0	0.0852758	100
ODG-37A	10.58052/IEODG001B	824	core	Arenas Blancas	ab	EMPA	64.6896	20.6892	0.007207	1.62403	0.301497	0.069692	0.744406	8.02974	3.89113	0	0	0.092442	100.139	64.5998	20.6605	0.007197	1.62178	0.301079	0.0695953	0.743373	8.0186	3.88573	0	0	0.0923137	100
ODG-37A	10.58052/IEODG001B	825	core	Arenas Blancas	ab	EMPA	64.6602	20.5682	0	1.62967	0.296426	0.065417	0.784384	7.93703	3.90484	0	0	0.085876	99.932	64.7042	20.5822	0	1.63078	0.296628	0.0654615	0.784917	7.94243	3.9075	0	0	0.0859344	100
ODG-37A	10.58052/IEODG001B	826	core	Arenas Blancas	ab	EMPA	64.5393	20.7427	0	1.70873	0.307453	0.092725	0.738622	8.0113	3.80657	0	0	0.081134	100.029	64.5209	20.7368	0	1.70824	0.307365	0.0926985	0.738411	8.00901	3.80548	0	0	0.0811109	100
ODG-37A	10.58052/IEODG001B	827	core	Arenas Blancas	ab	EMPA	64.454	20.6019	0.007632	1.63737	0.310031	0.075377	0.884088	8.07136	3.78442	0	0	0.087334	99.9135	64.5098	20.6197	0.00763861	1.63879	0.310299	0.0754422	0.884853	8.07835	3.7877	0	0	0.0874096	100
ODG-37A	10.58052/IEODG001B	828	core	Arenas Blancas	ab	EMPA	64.2075	21.2888	0	2.07436	0.260492	0.077573	0.859391	8.07112	3.48468	0	0	0.105759	100.43	63.9328	21.1977	0	2.06549	0.259378	0.0772411	0.855714	8.03659	3.46977	0	0	0.105307	100
ODG-37A	10.58052/IEODG001B	829	core	Arenas Blancas	ab	EMPA	65.4789	20.0772	0.009597	0.979144	0.272477	0.034656	0.49026	7.89735	4.72386	0	0	0.071837	100.035	65.4558	20.0701	0.00959362	0.978799	0.272381	0.0346438	0.490087	7.89456	4.72219	0	0	0.0718117	100
ODG-37A	10.58052/IEODG001B	830	outer rim	Arenas Blancas	ab	EMPA	65.992	19.6108	0	0.606292	0.244222	0	0.20679	7.58679	5.55009	0	0	0.079282	99.8763	66.0738	19.6351	0	0.607043	0.244525	0	0.207046	7.59619	5.55697	0	0	0.0793802	100
ODG-37A	10.58052/IEODG001B	831	outer rim	Arenas Blancas	ab	EMPA	65.545	19.8255	0	0.96641	0.251361	0	0.239055	7.88652	4.93835	0	0	0.075717	99.7279	65.7238	19.8796	0	0.969047	0.252047	0	0.239707	7.90804	4.95182	0	0	0.0759236	100
ODG-37A	10.58052/IEODG001B	832	outer rim	Arenas Blancas	ab	EMPA	64.7181	19.5828	0.010574	0.9222	0.259363	0	0.220914	7.78057	4.91826	0	0	0.080185	98.493	65.7083	19.8824	0.0107358	0.936311	0.263331	0	0.224294	7.89962	4.99351	0	0	0.0814119	100
ODG-37A	10.58052/IEODG001B	833	core	Arenas Blancas	ab	EMPA	64.6229	20.7274	0	1.65953	0.253846	0.054573	0.754274	7.97507	3.89167	0	0	0.086347	100.026	64.6064	20.7221	0	1.65911	0.253781	0.054559	0.754081	7.97303	3.89067	0	0	0.0863249	100
ODG-37A	10.58052/IEODG001B	834	core	Arenas Blancas	ab	EMPA	65.1055	20.2821	0	1.1203	0.314412	0.075889	0.935454	7.84156	4.59891	0	0	0.081921	100.356	64.8745	20.2101	0	1.11633	0.313297	0.0756198	0.932135	7.81374	4.58259	0	0	0.0816304	100
ODG-37A	10.58052/IEODG001B	835	core	Arenas Blancas	ab	EMPA	64.7276	20.562	0.007755	1.43092	0.297475	0.068832	0.734244	8.01666	4.04342	0	0	0.0895	99.9784	64.7416	20.5664	0.00775667	1.43123	0.297539	0.0688469	0.734403	8.01839	4.04429	0	0	0.0895193	100
ODG-37A	10.58052/IEODG001B	836	core	Arenas Blancas	ab	EMPA	65.0604	20.5813	0	1.45211	0.245029	0.056805	0.715417	8.06834	4.00945	0	0	0.084761	100.274	64.8829	20.5251	0	1.44815	0.24436	0.05665	0.713465	8.04632	3.99851	0	0	0.0845297	100
ODG-37A	10.58052/IEODG001B	837	core	Arenas Blancas	ab	EMPA	65.288	20.2062	0.013921	1.25198	0.262243	0.038361	0.556102	7.98313	4.37875	0	0	0.077416	100.056	65.2514	20.1949	0.0139132	1.25128	0.262096	0.0383395	0.55579	7.97865	4.37629	0	0	0.0773726	100
ODG-37A	10.58052/IEODG001B	838	outer rim	Arenas Blancas	ab	EMPA	66.0756	19.8994	0	0.894454	0.22689	0	0.201536	7.99198	4.72647	0	0	0.064182	100.081	66.0224	19.8834	0	0.893734	0.226707	0	0.201374	7.98555	4.72267	0	0	0.0641304	100
ODG-37A	10.58052/IEODG001B	839	outer rim	Arenas Blancas	ab	EMPA	65.9204	20.1091	0	1.01845	0.261338	0	0.199192	7.91978	4.79965	0	0	0.076987	100.305	65.72	20.048	0	1.01535	0.260544	0	0.198587	7.89571	4.78506	0	0	0.076753	100
ODG-37A	10.58052/IEODG001B	840	outer rim	Arenas Blancas	ab	EMPA	65.8696	19.8684	0	0.841207	0.288104	0	0.238422	7.80248	4.97449	0	0	0.074479	99.9572	65.8978	19.8769	0	0.841567	0.288227	0	0.238524	7.80582	4.97662	0	0	0.0745109	100
ODG-37A	10.58052/IEODG001B	841	core	Arenas Blancas	ab	EMPA	65.7286	20.1577	0.009356	1.14322	0.260019	0	0.332332	7.88186	4.64388	0	0	0.08425	100.241	65.5704	20.1092	0.00933349	1.14047	0.259393	0	0.331532	7.86289	4.63271	0	0	0.0840473	100
ODG-37A	10.58052/IEODG001B	842	core	Arenas Blancas	ab	EMPA	65.5584	20.1166	0	1.12495	0.304606	0.027131	0.334878	7.9016	4.56594	0	0	0.078629	100.013	65.5501	20.114	0	1.12481	0.304567	0.0271275	0.334835	7.90059	4.56536	0	0	0.078619	100
ODG-37A	10.58052/IEODG001B	843	core	Arenas Blancas	ab	EMPA	65.6118	19.7992	0.008265	0.783666	0.269148	0.05729	0.463729	7.58896	5.227	0	0	0.101061	99.9101	65.6708	19.817	0.00827244	0.784371	0.26939	0.0573415	0.464146	7.59579	5.2317	0	0	0.101152	100
ODG-37A	10.58052/IEODG001B	844	core	Arenas Blancas	ab	EMPA	65.7027	19.8529	0	0.868743	0.243974	0	0.35523	7.74753	4.93306	0	0	0.076666	99.7808	65.847	19.8965	0	0.870651	0.24451	0	0.35601	7.76455	4.9439	0	0	0.0768344	100
ODG-37A	10.58052/IEODG001B	845	core	Arenas Blancas	ab	EMPA	65.4792	20.069	0	1.07957	0.249042	0	0.348611	7.93111	4.64045	0	0	0.074802	99.8718	65.5633	20.0948	0	1.08096	0.249362	0	0.349059	7.94129	4.64641	0	0	0.074898	100
ODG-37A	10.58052/IEODG001B	846	core	Arenas Blancas	ab	EMPA	66.1598	19.7072	0	0.717829	0.272765	0	0.326587	7.71851	5.25185	0	0	0.077353	100.232	66.0067	19.6616	0	0.716168	0.272134	0	0.325831	7.70065	5.2397	0	0	0.077174	100
ODG-37A	10.58052/IEODG001B	848	microlite	Arenas Blancas	ab	EMPA	65.6978	19.9138	0.007701	0.971616	0.29282	0.025411	0.251916	7.80456	4.90907	0	0	0.081178	99.9559	65.7268	19.9226	0.0077044	0.972045	0.292949	0.0254222	0.252027	7.80801	4.91124	0	0	0.0812138	100
ODG-37A	10.58052/IEODG001B	850	core	Arenas Blancas	ab	EMPA	66.0604	20.1926	0	1.09059	0.253176	0.022624	0.302734	8.03278	4.54952	0	0	0.081079	100.586	65.6759	20.0751	0	1.08424	0.251702	0.0224923	0.300972	7.98602	4.52304	0	0	0.080607	100
ODG-37A	10.58052/IEODG001B	851	core	Arenas Blancas	ab	EMPA	65.7248	20.2977	0	1.16612	0.241345	0	0.261478	7.83607	4.65893	0	0	0.090074	100.277	65.5436	20.2417	0	1.1629	0.240679	0	0.260757	7.81446	4.64608	0	0	0.0898256	100
ODG-37A	10.58052/IEODG001B	852	core	Arenas Blancas	ab	EMPA	65.7309	20.0679	0	1.02951	0.261914	0.028185	0.287754	7.79679	4.82746	0	0	0.084413	100.115	65.6555	20.0449	0	1.02833	0.261614	0.0281527	0.287424	7.78785	4.82192	0	0	0.0843162	100
ODG-37A	10.58052/IEODG001B	853	core	Arenas Blancas	ab	EMPA	65.5586	20.0586	0	1.05199	0.303786	0.029083	0.297841	7.67227	4.79809	0	0	0.080416	99.8507	65.6566	20.0886	0	1.05356	0.30424	0.0291265	0.298286	7.68374	4.80527	0	0	0.0805363	100
ODG-37A	10.58052/IEODG001B	854	core	Arenas Blancas	ab	EMPA	65.8496	19.8476	0	0.993332	0.261914	0	0.299106	7.75713	4.90159	0	0	0.075124	99.9854	65.8592	19.8505	0	0.993477	0.261952	0	0.29915	7.75826	4.90231	0	0	0.075135	100
ODG-37A	10.58052/IEODG001B	855	core	Arenas Blancas	ab	EMPA	65.6153	20.2022	0.007151	1.0497	0.294698	0.046381	0.34531	7.84029	4.63555	0	0	0.07954	100.116	65.5392	20.1788	0.00714271	1.04848	0.294356	0.0463272	0.344909	7.8312	4.63017	0	0	0.0794477	100
ODG-37A	10.58052/IEODG001B	856	core	Arenas Blancas	ab	EMPA	66.1995	19.8288	0	0.744736	0.238953	0	0.313637	7.58144	5.26305	0	0	0.102995	100.273	66.0192	19.7748	0	0.742708	0.238302	0	0.312783	7.56079	5.24872	0	0	0.102714	100
ODG-37A	10.58052/IEODG001B	857	core	Arenas Blancas	ab	EMPA	65.8701	19.8389	0	0.822217	0.283473	0.028307	0.339226	7.63747	5.22847	0	0	0.075821	100.124	65.7885	19.8143	0	0.821199	0.283122	0.0282719	0.338806	7.62801	5.222	0	0	0.0757271	100
ODG-37A	10.58052/IEODG001B	858	core	Arenas Blancas	ab	EMPA	66.0595	19.6681	0	0.711498	0.307615	0	0.242242	7.69522	5.46139	0	0	0.073854	100.219	65.9149	19.625	0	0.70994	0.306942	0	0.241712	7.67837	5.44943	0	0	0.0736923	100
ODG-37A	10.58052/IEODG001B	859	core	Arenas Blancas	ab	EMPA	66.142	19.5219	0	0.593257	0.273819	0	0.233989	7.50099	5.59043	0	0	0.078911	99.9353	66.1848	19.5345	0	0.593641	0.273996	0	0.23414	7.50585	5.59405	0	0	0.0789621	100
ODG-37A	10.58052/IEODG001B	860	outer rim	Arenas Blancas	ab	EMPA	65.3598	20.104	0	1.17387	0.340648	0	0.189433	7.76851	4.71821	0	0	0.190535	99.845	65.4613	20.1352	0	1.17569	0.341177	0	0.189727	7.78057	4.72553	0	0	0.190831	100
ODG-37A	10.58052/IEODG001B	861	core	Arenas Blancas	ab	EMPA	65.7455	19.9503	0	0.82412	0.281429	0	0.368788	7.74347	5.14506	0	0	0.075721	100.134	65.6573	19.9235	0	0.823014	0.281051	0	0.368293	7.73308	5.13815	0	0	0.0756194	100
ODG-37A	10.58052/IEODG001B	862	core	Arenas Blancas	ab	EMPA	65.8083	19.9526	0.008088	0.939517	0.267082	0.021351	0.291892	7.92	4.71831	0	0	0.075323	100.002	65.8067	19.9521	0.0080878	0.939494	0.267075	0.0213505	0.291885	7.9198	4.71819	0	0	0.0753211	100
ODG-37A	10.58052/IEODG001B	863	outer rim	Arenas Blancas	ab	EMPA	65.9961	19.9035	0.009324	0.82702	0.267036	0	0.245737	7.72914	5.03409	0	0	0.080342	100.092	65.9352	19.8851	0.0093154	0.826257	0.26679	0	0.24551	7.72201	5.02945	0	0	0.0802679	100
ODG-37A	10.58052/IEODG001B	864	core	Arenas Blancas	ab	EMPA	65.595	20.306	0	1.15272	0.26178	0.020895	0.407457	7.78592	4.66314	0	0	0.089133	100.282	65.4105	20.2489	0	1.14948	0.261044	0.0208362	0.406311	7.76402	4.65002	0	0	0.0888823	100
ODG-37A	10.58052/IEODG001B	865	core	Arenas Blancas	ab	EMPA	65.8972	20.1874	0	1.03116	0.249315	0.020746	0.329807	7.94124	4.73774	0	0	0.070187	100.465	65.5923	20.094	0	1.02639	0.248162	0.02065	0.328281	7.9045	4.71582	0	0	0.0698623	100
ODG-37A	10.58052/IEODG001B	866	outer rim	Arenas Blancas	ab	EMPA	66.4619	20.1563	0	0.928147	0.31344	0	0.203631	8.06248	4.68831	0	0	0.072987	100.887	65.8774	19.979	0	0.919985	0.310684	0	0.20184	7.99158	4.64708	0	0	0.0723452	100
ODG-37A	10.58052/IEODG001B	867	core	Arenas Blancas	ab	EMPA	65.6523	20.236	0	1.11565	0.288096	0.045868	0.322123	7.9053	4.58981	0	0	0.080162	100.235	65.4982	20.1885	0	1.11303	0.28742	0.0457603	0.321367	7.88674	4.57904	0	0	0.0799738	100
ODG-37A	10.58052/IEODG001B	868	core	Arenas Blancas	ab	EMPA	65.4493	20.0481	0	1.10937	0.25048	0	0.332412	7.98937	4.43278	0	0	0.083761	99.6956	65.6492	20.1093	0	1.11276	0.251245	0	0.333427	8.01377	4.44632	0	0	0.0840168	100
ODG-37A	10.58052/IEODG001B	869	outer rim	Arenas Blancas	ab	EMPA	65.8153	19.8908	0.011043	0.968956	0.28964	0	0.213569	8.08058	4.54097	0	0	0.078667	99.8895	65.8881	19.9128	0.0110552	0.970028	0.28996	0	0.213805	8.08952	4.54599	0	0	0.078754	100
ODG-37A	10.58052/IEODG001B	870	core	Arenas Blancas	ab	EMPA	64.6793	20.7336	0.006978	1.55764	0.305973	0.06193	0.948756	7.91287	3.91621	0	0	0.086591	100.21	64.5439	20.6902	0.00696339	1.55438	0.305332	0.0618003	0.946769	7.8963	3.90801	0	0	0.0864097	100
ODG-37A	10.58052/IEODG001B	871	core	Arenas Blancas	ab	EMPA	64.7359	20.5016	0	1.36166	0.264324	0.057628	0.921338	8.01022	4.0637	0	0	0.079937	99.9963	64.7383	20.5024	0	1.36171	0.264334	0.0576301	0.921372	8.01052	4.06385	0	0	0.07994	100
ODG-37A	10.58052/IEODG001B	872	core	Arenas Blancas	ab	EMPA	64.7097	20.6204	0	1.40982	0.317703	0.047925	1.01647	7.97485	4.09445	0	0	0.080809	100.272	64.5341	20.5644	0	1.40599	0.316841	0.0477949	1.01371	7.95321	4.08334	0	0	0.0805897	100
ODG-37A	10.58052/IEODG001B	873	core	Arenas Blancas	ab	EMPA	64.7146	20.5732	0	1.37384	0.291036	0.059708	0.989585	7.88588	4.02898	0	0	0.080947	99.9978	64.716	20.5737	0	1.37387	0.291042	0.0597093	0.989607	7.88606	4.02907	0	0	0.0809488	100
ODG-37A	10.58052/IEODG001B	874	core	Arenas Blancas	ab	EMPA	64.8868	20.7971	0.0103	1.47744	0.311054	0.029281	0.956012	7.90237	3.93052	0	0	0.08291	100.384	64.6387	20.7176	0.0102606	1.47179	0.309865	0.0291691	0.952357	7.87216	3.91549	0	0	0.082593	100
ODG-37A	10.58052/IEODG001B	875	core	Arenas Blancas	ab	EMPA	64.5317	20.7424	0.010094	1.59448	0.293944	0.061329	0.947646	7.89556	3.99373	0	0	0.097014	100.168	64.4235	20.7076	0.0100771	1.59181	0.293451	0.0612262	0.946058	7.88233	3.98704	0	0	0.0968514	100
ODG-37A	10.58052/IEODG001B	876	core	Arenas Blancas	ab	EMPA	64.7384	20.8746	0.009815	1.65742	0.300238	0.046846	0.872087	7.97985	3.84185	0	0	0.071545	100.393	64.4852	20.793	0.00977661	1.65094	0.299064	0.0466628	0.868676	7.94864	3.82682	0	0	0.0712652	100
ODG-37A	10.58052/IEODG001B	877	core	Arenas Blancas	ab	EMPA	64.6251	20.6009	0	1.56721	0.295141	0.038382	0.852314	7.94211	4.06258	0	0	0.086769	100.071	64.5796	20.5864	0	1.56611	0.294933	0.038355	0.851713	7.93651	4.05972	0	0	0.0867079	100
ODG-37A	10.58052/IEODG001B	878	core	Arenas Blancas	ab	EMPA	64.4013	20.9709	0	1.87318	0.28026	0.026235	0.596543	8.07704	3.66653	0	0	0.074371	99.9664	64.423	20.978	0	1.87381	0.280354	0.0262438	0.596744	8.07976	3.66776	0	0	0.074396	100
ODG-37A	10.58052/IEODG001B	879	core	Arenas Blancas	ab	EMPA	65.8933	19.6376	0	0.649021	0.248024	0	0.25859	7.57418	5.49758	0	0	0.08053	99.8388	65.9997	19.6693	0	0.650069	0.248424	0	0.259007	7.58641	5.50646	0	0	0.08066	100
ODG-37A	10.58052/IEODG001B	880	core	Arenas Blancas	ab	EMPA	65.6583	19.7696	0	0.758762	0.258498	0	0.415239	7.65064	5.25207	0	0	0.09039	99.8535	65.7546	19.7986	0	0.759875	0.258877	0	0.415848	7.66186	5.25978	0	0	0.0905226	100
ODG-37A	10.58052/IEODG001B	881	outer rim	Arenas Blancas	ab	EMPA	65.34	19.6772	0	0.825205	0.266471	0	0.434053	7.68987	5.00729	0	0	0.101128	99.3412	65.7733	19.8077	0	0.830677	0.268238	0	0.436931	7.74087	5.0405	0	0	0.101799	100
ODG-37A	10.58052/IEODG001B	882	outer rim	Arenas Blancas	ab	EMPA	65.9757	19.8496	0.010623	0.779326	0.264634	0.018868	0.441401	8.02624	4.92273	0	0	0.085634	100.375	65.7294	19.7755	0.0105833	0.776416	0.263646	0.0187976	0.439753	7.99627	4.90435	0	0	0.0853143	100
ODG-37A	10.58052/IEODG001B	883	outer rim	Arenas Blancas	ab	EMPA	65.6976	19.8651	0	0.830969	0.283641	0.018305	0.301303	7.68984	5.20966	0	0	0.087488	99.9839	65.7082	19.8683	0	0.831103	0.283687	0.0183079	0.301351	7.69108	5.2105	0	0	0.0875021	100
ODG-37A	10.58052/IEODG001B	885	core	Arenas Blancas	ab	EMPA	64.7853	20.6553	0	1.59469	0.299307	0.034218	0.806221	7.96139	3.83288	0	0	0.118506	100.088	64.7285	20.6372	0	1.59329	0.299044	0.034188	0.805514	7.95441	3.82952	0	0	0.118402	100
ODG-37A	10.58052/IEODG001B	886	core	Arenas Blancas	ab	EMPA	64.727	20.4082	0.008664	1.47417	0.306434	0.077025	0.723644	7.98315	3.93222	0	0	0.105799	99.7463	64.8916	20.4601	0.00868604	1.47792	0.307213	0.0772209	0.725485	8.00345	3.94222	0	0	0.106068	100
ODG-37A	10.58052/IEODG001B	887	core	Arenas Blancas	ab	EMPA	65.1388	20.2954	0.010626	1.17925	0.306615	0.030852	0.639796	7.90227	4.39257	0	0	0.080829	99.977	65.1538	20.3001	0.0106284	1.17952	0.306686	0.0308591	0.639943	7.90409	4.39358	0	0	0.0808476	100
ODG-37A	10.58052/IEODG001B	888	core	Arenas Blancas	ab	EMPA	65.3382	20.2209	0	1.17823	0.23327	0.031352	0.61844	7.94194	4.34739	0	0	0.076722	99.9864	65.3471	20.2236	0	1.17839	0.233302	0.0313563	0.618524	7.94302	4.34798	0	0	0.0767324	100
ODG-37A	10.58052/IEODG001B	889	core	Arenas Blancas	ab	EMPA	65.6229	20.1517	0	1.01634	0.261259	0.026784	0.502716	7.84482	4.71711	0	0	0.075572	100.219	65.4794	20.1076	0	1.01412	0.260688	0.0267254	0.501616	7.82766	4.70679	0	0	0.0754067	100
ODG-37A	10.58052/IEODG001B	890	core	Arenas Blancas	ab	EMPA	65.2037	20.0135	0	1.00457	0.267077	0.033284	0.519307	7.77893	4.79015	0	0	0.091003	99.7015	65.3989	20.0734	0	1.00758	0.267877	0.0333836	0.520862	7.80222	4.80449	0	0	0.0912754	100
ODG-37A	10.58052/IEODG001B	891	core	Arenas Blancas	ab	EMPA	65.9462	19.975	0	0.88384	0.247018	0.020319	0.273397	7.80405	4.94148	0	0	0.074718	100.166	65.8369	19.9419	0	0.882375	0.246609	0.0202853	0.272944	7.79112	4.93329	0	0	0.0745942	100
ODG-37A	10.58052/IEODG001B	892	outer rim	Arenas Blancas	ab	EMPA	65.7895	19.654	0	0.799762	0.317652	0	0.204812	7.60049	5.11966	0	0	0.076937	99.5628	66.0784	19.7403	0	0.803274	0.319047	0	0.205711	7.63386	5.14214	0	0	0.0772748	100
ODG-37A	10.58052/IEODG001B	894	core	Arenas Blancas	ab	EMPA	64.9846	20.597	0	1.49657	0.346977	0.060857	0.70521	8.02434	3.97935	0	0	0.090662	100.286	64.7996	20.5383	0	1.49231	0.345989	0.0606837	0.703202	8.00149	3.96802	0	0	0.0904038	100
ODG-37A	10.58052/IEODG001B	895	core	Arenas Blancas	ab	EMPA	65.531	20.2007	0	1.21438	0.265691	0.031551	0.421971	8.28364	4.14614	0	0	0.076528	100.172	65.4187	20.1661	0	1.2123	0.265236	0.031497	0.421248	8.26945	4.13904	0	0	0.0763969	100
ODG-37A	10.58052/IEODG001B	896	core	Arenas Blancas	ab	EMPA	66.1031	19.633	0	0.629759	0.268599	0	0.251247	7.70707	5.51111	0	0	0.072494	100.176	65.9867	19.5984	0	0.62865	0.268126	0	0.250805	7.6935	5.50141	0	0	0.0723664	100
ODG-37A	10.58052/IEODG001B	897	outer rim	Arenas Blancas	ab	EMPA	65.7595	19.8217	0	0.833661	0.284328	0.023544	0.286899	7.73747	5.31843	0	0	0.086142	100.152	65.6599	19.7917	0	0.832398	0.283897	0.0235083	0.286465	7.72575	5.31038	0	0	0.0860115	100
ODG-37A	10.58052/IEODG001B	898	outer rim	Arenas Blancas	ab	EMPA	66.0276	19.8668	0	0.727653	0.24649	0	0.288949	7.44196	5.57005	0	0	0.080834	100.25	65.8627	19.8172	0	0.725836	0.245874	0	0.288227	7.42338	5.55614	0	0	0.0806321	100
ODG-37A	10.58052/IEODG001B	899	core	Arenas Blancas	ab	EMPA	65.1208	20.6239	0	1.53378	0.285657	0.040063	0.646418	8.01189	4.01844	0	0	0.084819	100.366	64.8835	20.5487	0	1.52819	0.284616	0.039917	0.644062	7.98269	4.0038	0	0	0.0845099	100
ODG-37A	10.58052/IEODG001B	900	outer rim	Arenas Blancas	ab	EMPA	65.5227	20.3481	0.009104	1.30154	0.291745	0.027383	0.300897	7.95529	4.31618	0	0	0.083266	100.156	65.4205	20.3164	0.0090898	1.29951	0.29129	0.0273403	0.300428	7.94288	4.30945	0	0	0.0831361	100
ODG-39A	10.58052/IEODG001D	738	core	Teide J2	TJ2	EMPA	66.3628	19.6516	0	0.587421	0.193667	0	0.104329	7.5313	5.45903		0	0.063892	99.954	66.3933	19.6606	0	0.587691	0.193756	0	0.104377	7.53476	5.46154	0	0	0.0639214	100
ODG-39A	10.58052/IEODG001D	739	core	Teide J2	TJ2	EMPA	66.3011	19.9641	0.007631	0.848987	0.21802	0	0.111942	7.79567	4.88579		0	0.078148	100.211	66.1612	19.922	0.0076149	0.847196	0.21756	0	0.111706	7.77923	4.87548	0	0	0.0779832	100
ODG-39A	10.58052/IEODG001D	740	outer rim	Teide J2	TJ2	EMPA	66.5099	19.6718	0	0.549291	0.26852	0	0.096639	7.37683	5.78759		0	0.069145	100.33	66.2913	19.6072	0	0.547486	0.267638	0	0.0963214	7.35259	5.76857	0	0	0.0689178	100
ODG-39A	10.58052/IEODG001D	741	outer rim	Teide J2	TJ2	EMPA	66.0538	19.7226	0	0.784916	0.241033	0	0.083535	7.84584	4.95797		0	0.067684	99.7574	66.2145	19.7706	0	0.786825	0.241619	0	0.0837382	7.86492	4.97003	0	0	0.0678486	100
ODG-39A	10.58052/IEODG001D	742	core	Teide J2	TJ2	EMPA	66.425	19.7121	0	0.766683	0.262755	0	0.097571	7.54397	5.27598		0	0.077359	100.161	66.318	19.6803	0	0.765447	0.262332	0	0.0974138	7.53181	5.26748	0	0	0.0772343	100
ODG-39A	10.58052/IEODG001D	743	core	Teide J2	TJ2	EMPA	66.1128	19.5299	0	0.545105	0.249304	0	0.11709	7.26636	5.9639		0	0.090466	99.8749	66.1956	19.5544	0	0.545788	0.249616	0	0.117237	7.27546	5.97137	0	0	0.0905793	100
ODG-39A	10.58052/IEODG001D	744	core	Teide J2	TJ2	EMPA	65.8656	19.495	0	0.555127	0.190117	0	0.13649	7.27871	5.92908		0	0.096049	99.5462	66.1659	19.5839	0	0.557658	0.190984	0	0.137112	7.31189	5.95611	0	0	0.0964869	100
ODG-39A	10.58052/IEODG001D	745	core	Teide J2	TJ2	EMPA	65.856	19.9736	0	1.0093	0.243103	0	0.071378	7.93084	4.54541		0	0.094173	99.7238	66.0384	20.0289	0	1.0121	0.243776	0	0.0715757	7.95281	4.558	0	0	0.0944338	100
ODG-39A	10.58052/IEODG001D	746	core	Teide J2	TJ2	EMPA	65.7993	19.8635	0.009349	0.86333	0.223721	0	0.090631	7.70561	5.16522		0	0.081049	99.8017	65.93	19.903	0.00936757	0.865045	0.224165	0	0.0908111	7.72092	5.17548	0	0	0.08121	100
ODG-39A	10.58052/IEODG001D	747	outer rim	Teide J2	TJ2	EMPA	66.2731	19.638	0.007621	0.646156	0.266526	0	0.102378	7.39369	5.73483		0	0.06836	100.131	66.1866	19.6124	0.00761106	0.645313	0.266178	0	0.102244	7.38404	5.72735	0	0	0.0682708	100
ODG-39A	10.58052/IEODG001D	748	core	Teide J2	TJ2	EMPA	65.8822	19.6962	0	0.739266	0.233771	0	0.084391	7.63107	5.28741		0	0.080696	99.635	66.1235	19.7684	0	0.741974	0.234627	0	0.0847002	7.65903	5.30678	0	0	0.0809916	100
ODG-39A	10.58052/IEODG001D	749	outer rim	Teide J2	TJ2	EMPA	66.192	19.7681	0.009509	0.726585	0.24572	0	0.08508	7.55997	5.45028		0	0.070685	100.108	66.1206	19.7468	0.00949875	0.725802	0.245455	0	0.0849883	7.55182	5.4444	0	0	0.0706088	100
ODG-39A	10.58052/IEODG001D	750	outer rim	Teide J2	TJ2	EMPA	65.9439	19.7023	0.009104	0.713977	0.253572	0	0.098907	7.61999	5.38664		0	0.074293	99.8027	66.0743	19.7413	0.009122	0.715389	0.254073	0	0.0991025	7.63506	5.39729	0	0	0.0744399	100
ODG-39A	10.58052/IEODG001D	751	core	Teide J2	TJ2	EMPA	66.0343	19.7925	0	0.794921	0.214894	0	0.096934	7.8159	5.1101		0	0.06914	99.9287	66.0814	19.8066	0	0.795488	0.215047	0	0.0970032	7.82148	5.11375	0	0	0.0691893	100
ODG-39A	10.58052/IEODG001D	752	core	Teide J2	TJ2	EMPA	66.1682	19.9671	0.010022	0.910793	0.237875	0	0.087965	7.8911	4.83559		0	0.086152	100.195	66.0396	19.9283	0.0100025	0.909022	0.237413	0	0.087794	7.87576	4.82619	0	0	0.0859845	100
ODG-39A	10.58052/IEODG001D	753	core	Teide J2	TJ2	EMPA	66.0973	20.0686	0	0.905731	0.269281	0	0.079096	7.95236	4.88367		0	0.078499	100.335	65.8769	20.0017	0	0.902711	0.268383	0	0.0788323	7.92585	4.86739	0	0	0.0782373	100
ODG-39A	10.58052/IEODG001D	754	core	Teide J2	TJ2	EMPA	66.0373	19.8324	0.009964	0.775577	0.234807	0	0.083508	7.80719	5.10628		0	0.070922	99.9579	66.0651	19.8407	0.00996819	0.775903	0.234906	0	0.0835431	7.81047	5.10843	0	0	0.0709518	100
ODG-39A	10.58052/IEODG001D	755	outer rim	Teide J2	TJ2	EMPA	66.235	19.753	0	0.746667	0.26594	0	0.08951	7.93357	5.11361		0	0.070371	100.208	66.0977	19.7121	0	0.74512	0.265389	0	0.0893245	7.91713	5.10301	0	0	0.0702252	100
ODG-39A	10.58052/IEODG001D	756	core	Teide J2	TJ2	EMPA	66.049	20.0293	0	0.920344	0.298072	0	0.072371	7.88693	4.75996		0	0.0672	100.083	65.9941	20.0127	0	0.919579	0.297824	0	0.0723109	7.88038	4.756	0	0	0.0671442	100
ODG-39A	10.58052/IEODG001D	757	core	Teide J2	TJ2	EMPA	66.3046	19.88	0	0.713061	0.216271	0.027935	0.10147	7.5579	5.50835		0	0.073808	100.383	66.0514	19.8041	0	0.710338	0.215445	0.0278283	0.101082	7.52903	5.48731	0	0	0.0735261	100
ODG-39A	10.58052/IEODG001D	759	core	Teide J2	TJ2	EMPA	66.1422	19.5803	0	0.652436	0.261394	0	0.107384	7.47508	5.59524		0	0.067021	99.8811	66.221	19.6036	0	0.653213	0.261705	0	0.107512	7.48398	5.6019	0	0	0.0671008	100
ODG-39A	10.58052/IEODG001D	760	core	Teide J2	TJ2	EMPA	65.725	20.168	0.00704	1.12927	0.286322	0	0.063846	8.07986	4.31534		0	0.062306	99.837	65.8323	20.2009	0.0070515	1.13111	0.28679	0	0.0639502	8.09305	4.32239	0	0	0.0624077	100
ODG-39A	10.58052/IEODG001D	761	core	Teide J2	TJ2	EMPA	65.7883	19.9153	0.011158	0.863237	0.233226	0	0.068452	7.55491	5.41522		0	0.073408	99.9232	65.8389	19.9306	0.0111666	0.8639	0.233405	0	0.0685046	7.56072	5.41938	0	0	0.0734644	100
ODG-39A	10.58052/IEODG001D	762	core	Teide J2	TJ2	EMPA	65.5883	20.0532	0	1.15701	0.26946	0	0.05925	7.95379	4.51208		0	0.084512	99.6776	65.8004	20.1181	0	1.16075	0.270332	0	0.0594416	7.97952	4.52667	0	0	0.0847853	100
ODG-39A	10.58052/IEODG001D	763	core	Teide J2	TJ2	EMPA	66.1199	19.6644	0	0.752474	0.308603	0	0.077642	7.79931	5.06443		0	0.068415	99.8552	66.2158	19.6929	0	0.753565	0.309051	0	0.0777546	7.81062	5.07178	0	0	0.0685142	100
ODG-39A	10.58052/IEODG001D	764	core	Teide J2	TJ2	EMPA	65.6972	19.8748	0	0.926619	0.21606	0	0.079071	7.95495	4.78333		0.034962	0.067735	99.6347	65.9381	19.9477	0	0.930016	0.216852	0	0.0793609	7.98411	4.80087	0	0.0350902	0.0679833	100
ODG-39A	10.58052/IEODG001D	765	core	Teide J2	TJ2	EMPA	65.8053	19.7859	0	0.883096	0.242314	0	0.062317	7.85798	4.79669		0	0.069439	99.503	66.134	19.8847	0	0.887507	0.243524	0	0.0626282	7.89723	4.82065	0	0	0.0697858	100
ODG-39A	10.58052/IEODG001D	766	outer rim	Teide J2	TJ2	EMPA	65.6827	19.7397	0	0.919493	0.305094	0	0.11922	7.54629	5.33917		0	0.106476	99.7581	65.8419	19.7876	0	0.921722	0.305834	0	0.119509	7.56459	5.35211	0	0	0.106734	100
ODG-39A	10.58052/IEODG001D	767	core	Teide J2	TJ2	EMPA	66.0228	20.0823	0	1.0904	0.272699	0	0.063187	8.00089	4.46463		0	0.097428	100.094	65.9606	20.0634	0	1.08937	0.272442	0	0.0631274	7.99335	4.46042	0	0	0.0973362	100
ODG-39A	10.58052/IEODG001D	768	core	Teide J2	TJ2	EMPA	66.3151	19.6364	0	0.591166	0.246636	0.030412	0.101223	7.41391	5.78299		0	0.08179	100.2	66.183	19.5973	0	0.589988	0.246145	0.0303514	0.101021	7.39914	5.77147	0	0	0.0816271	100
ODG-39A	10.58052/IEODG001D	769	core	Teide J2	TJ2	EMPA	65.8793	19.6893	0	0.803156	0.253042	0	0.077641	7.76015	5.1559		0	0.072326	99.6908	66.0836	19.7504	0	0.805647	0.253827	0	0.0778818	7.78422	5.17189	0	0	0.0725503	100
ODG-39A	10.58052/IEODG001D	770	outer rim	Teide J2	TJ2	EMPA	65.849	19.9688	0.009472	0.80996	0.270812	0	0.11579	7.63242	5.17818		0	0.090503	99.9249	65.8985	19.9838	0.00947912	0.810568	0.271015	0	0.115877	7.63815	5.18207	0	0	0.090571	100
ODG-39A	10.58052/IEODG001D	771	core	Teide J2	TJ2	EMPA	65.8253	19.9731	0.012278	0.945977	0.327612	0	0.063636	7.91563	4.70056		0	0.084283	99.8484	65.9253	20.0034	0.0122966	0.947414	0.328109	0	0.0637326	7.92765	4.7077	0	0	0.084411	100
ODG-39A	10.58052/IEODG001D	772	core	Teide J2	TJ2	EMPA	66.0335	19.9569	0	0.94261	0.285235	0	0.076367	7.90742	4.74795		0	0.078155	100.028	66.0149	19.9513	0	0.942345	0.285155	0	0.0763455	7.9052	4.74661	0	0	0.078133	100
ODG-39A	10.58052/IEODG001D	773	feld micro	Teide J2	TJ2	EMPA	65.5595	19.9769	0	1.04781	0.333043	0.022977	0.05669	8.18002	4.08487		0	0.071782	99.3336	65.9993	20.1109	0	1.05484	0.335277	0.0231311	0.0570703	8.2349	4.11227	0	0	0.0722636	100
ODG-39A	10.58052/IEODG001D	774	core	Teide J2	TJ2	EMPA	65.2145	20.1371	0.009067	1.19589	0.304981	0	0.089666	7.62251	4.86556		0	0.083723	99.523	65.5271	20.2336	0.00911046	1.20162	0.306443	0	0.0900958	7.65904	4.88888	0	0	0.0841243	100
ODG-39A	10.58052/IEODG001D	775	core	Teide J2	TJ2	EMPA	66.0448	19.8099	0	0.862381	0.277044	0	0.093226	7.8212	4.81918		0	0.077964	99.8057	66.1734	19.8485	0	0.86406	0.277583	0	0.0934075	7.83643	4.82856	0	0	0.0781158	100
ODG-39A	10.58052/IEODG001D	776	core	Teide J2	TJ2	EMPA	65.9907	19.596	0	0.639303	0.203259	0	0.100095	7.57819	5.42761		0	0.077499	99.6127	66.2473	19.6722	0	0.641789	0.204049	0	0.100484	7.60766	5.44872	0	0	0.0778004	100
ODG-39A	10.58052/IEODG001D	777	core	Teide J2	TJ2	EMPA	66.0496	19.7761	0.008599	0.715405	0.202247	0	0.086252	7.3785	5.46737		0	0.071092	99.7552	66.2117	19.8246	0.00862011	0.717161	0.202743	0	0.0864637	7.39661	5.48079	0	0	0.0712665	100
ODG-39A	10.58052/IEODG001D	778	core	Teide J2	TJ2	EMPA	65.8582	19.731	0	0.796566	0.227374	0	0.101528	7.64583	5.29265		0	0.076485	99.7296	66.0367	19.7845	0	0.798725	0.22799	0	0.101803	7.66656	5.307	0	0	0.0766924	100
ODG-39A	10.58052/IEODG001D	779	core	Teide J2	TJ2	EMPA	66.2059	19.808	0	0.829106	0.264637	0	0.090953	7.67562	5.14396		0	0.069647	100.088	66.1478	19.7906	0	0.828378	0.264405	0	0.0908732	7.66888	5.13945	0	0	0.0695859	100
ODG-41A	10.58052/IEODG001F	276	core	Pico Viejo C	PVC	EMPA	51.8602	29.9372	0.088479	12.6011	0.549483	0.290153	0.04418	4.10233	0.319446		0	0.114324	99.9069	51.9085	29.9651	0.0885615	12.6128	0.549995	0.290423	0.0442212	4.10615	0.319744	0	0	0.114431	100
ODG-41A	10.58052/IEODG001F	277	core	Pico Viejo C	PVC	EMPA	51.7817	29.614	0.0861	12.7867	0.496781	0.315136	0.058543	4.06829	0.336523		0	0.112213	99.656	51.9605	29.7162	0.0863972	12.8308	0.498496	0.316224	0.0587451	4.08233	0.337685	0	0	0.1126	100
ODG-41A	10.58052/IEODG001F	278	core	Pico Viejo C	PVC	EMPA	51.3216	29.8652	0.088364	12.9709	0.560089	0.323698	0.019157	4.00114	0.359068		0	0.112213	99.6214	51.5166	29.9787	0.0886998	13.0202	0.562217	0.324928	0.0192298	4.01634	0.360432	0	0	0.112639	100
ODG-41A	10.58052/IEODG001F	279	core	Pico Viejo C	PVC	EMPA	51.4449	30.1265	0.080573	13.0464	0.602708	0.279896	0.029444	3.92175	0.314746		0	0.112727	99.9596	51.4657	30.1387	0.0806055	13.0517	0.602951	0.280009	0.0294559	3.92333	0.314873	0	0	0.112773	100
ODG-41A	10.58052/IEODG001F	280	core	Pico Viejo C	PVC	EMPA	50.3948	31.0918	0.07678	14.0498	0.561138	0.319514	0.042051	3.36034	0.254142		0	0.10223	100.253	50.2678	31.0135	0.0765865	14.0144	0.559724	0.318709	0.041945	3.35187	0.253502	0	0	0.101972	100
ODG-41A	10.58052/IEODG001F	281	outer rim	Pico Viejo C	PVC	EMPA	53.6255	28.4185	0.071438	11.1073	0.440421	0.302158	0.059732	4.92194	0.487556		0	0.170302	99.6048	53.8382	28.5312	0.0717214	11.1514	0.442168	0.303357	0.059969	4.94147	0.48949	0	0	0.170978	100
ODG-41A	10.58052/IEODG001F	282	outer rim	Pico Viejo C	PVC	EMPA	53.9318	28.3798	0.073453	10.9157	0.480886	0.348852	0.066891	4.99732	0.508364		0	0.185793	99.8889	53.9918	28.4114	0.0735347	10.9278	0.481421	0.34924	0.0669654	5.00288	0.50893	0	0	0.186	100
ODG-41A	10.58052/IEODG001F	283	feld micro	Pico Viejo C	PVC	EMPA	54.3904	28.1345	0.061568	10.524	0.468493	0.279297	0.072165	5.07954	0.576805		0	0.172537	99.7593	54.5216	28.2024	0.0617165	10.5494	0.469623	0.279971	0.0723391	5.0918	0.578197	0	0	0.172953	100
ODG-41A	10.58052/IEODG001F	284	feld micro	Pico Viejo C	PVC	EMPA	54.2421	28.1607	0.067496	10.7291	0.427785	0.293486	0.05511	5.05001	0.564548		0	0.168625	99.759	54.3732	28.2287	0.0676591	10.755	0.428819	0.294195	0.0552432	5.06221	0.565912	0	0	0.169032	100
ODG-41A	10.58052/IEODG001F	285	feld micro	Pico Viejo C	PVC	EMPA	55.6247	26.9964	0.057658	9.34739	0.410232	0.381629	0.122452	5.60262	0.740399		0	0.161828	99.4453	55.935	27.147	0.0579796	9.39953	0.41252	0.383758	0.123135	5.63387	0.744529	0	0	0.162731	100
ODG-41A	10.58052/IEODG001F	286	core	Pico Viejo C	PVC	EMPA	50.3933	30.4963	0.080835	13.4218	0.506161	0.278541	0.047781	3.66716	0.266112		0	0.121076	99.2791	50.7592	30.7178	0.081422	13.5193	0.509837	0.280564	0.048128	3.69379	0.268044	0	0	0.121955	100
ODG-41A	10.58052/IEODG001F	287	core	Pico Viejo C	PVC	EMPA	50.0212	30.7283	0.067711	13.9966	0.607884	0.312713	0.03475	3.29508	0.248382		0	0.11188	99.4245	50.3107	30.9062	0.0681029	14.0776	0.611403	0.314523	0.0349511	3.31415	0.24982	0	0	0.112528	100
ODG-41A	10.58052/IEODG001F	288	outer rim	Pico Viejo C	PVC	EMPA	54.0637	28.409	0.068561	10.7668	0.562194	0.32693	0.082508	4.97409	0.542889		0	0.182347	99.979	54.075	28.415	0.0685754	10.7691	0.562312	0.326999	0.0825253	4.97513	0.543003	0	0	0.182385	100
ODG-41A	10.58052/IEODG001F	289	core	Pico Viejo C	PVC	EMPA	51.7007	29.794	0.065289	12.7414	0.437503	0.299321	0.040722	4.12243	0.343364		0	0.131845	99.6766	51.8685	29.8907	0.0655008	12.7827	0.438923	0.300292	0.0408541	4.13581	0.344478	0	0	0.132273	100
ODG-41A	10.58052/IEODG001F	290	core	Pico Viejo C	PVC	EMPA	51.9976	29.5561	0.061376	12.5794	0.438273	0.333092	0.031931	4.17904	0.371187		0	0.129133	99.6771	52.166	29.6518	0.0615748	12.6201	0.439693	0.334171	0.0320344	4.19258	0.372389	0	0	0.129551	100
ODG-41A	10.58052/IEODG001F	291	core	Pico Viejo C	PVC	EMPA	53.3278	28.807	0.062657	11.5314	0.442154	0.287712	0.052837	4.62398	0.428438		0	0.138495	99.7025	53.4869	28.893	0.062844	11.5658	0.443473	0.288571	0.0529947	4.63778	0.429717	0	0	0.138908	100
ODG-41A	10.58052/IEODG001F	292	core	Pico Viejo C	PVC	EMPA	53.2659	28.9572	0.069028	11.5307	0.438239	0.279506	0.04769	4.58999	0.43196		0	0.137735	99.7479	53.4005	29.0304	0.0692024	11.5598	0.439346	0.280212	0.0478105	4.60159	0.433052	0	0	0.138083	100
ODG-41A	10.58052/IEODG001F	293	core	Pico Viejo C	PVC	EMPA	53.2165	28.8987	0.059123	11.6593	0.48254	0.292724	0.056185	4.61648	0.42111		0	0.144247	99.8469	53.2981	28.943	0.0592137	11.6772	0.48328	0.293173	0.0562711	4.62356	0.421756	0	0	0.144468	100
ODG-41A	10.58052/IEODG001F	294	core	Pico Viejo C	PVC	EMPA	52.4526	29.3733	0.062756	12.1384	0.454466	0.279729	0.04918	4.29826	0.363168		0	0.123403	99.5953	52.6658	29.4927	0.063011	12.1877	0.456313	0.280866	0.0493799	4.31573	0.364644	0	0	0.123904	100
ODG-41A	10.58052/IEODG001F	295	core	Pico Viejo C	PVC	EMPA	52.2916	29.4328	0.058031	12.1966	0.453526	0.325861	0.042426	4.22821	0.381782		0	0.125263	99.5361	52.5353	29.57	0.0583015	12.2534	0.45564	0.32738	0.0426237	4.24792	0.383561	0	0	0.125847	100
ODG-41A	10.58052/IEODG001F	296	core	Pico Viejo C	PVC	EMPA	51.2944	29.9947	0.074865	12.9869	0.535509	0.343979	0.049235	3.8436	0.321267		0	0.114835	99.5593	51.5215	30.1275	0.0751964	13.0444	0.537879	0.345502	0.0494529	3.86061	0.322689	0	0	0.115343	100
ODG-41A	10.58052/IEODG001F	297	core	Pico Viejo C	PVC	EMPA	52.0742	29.4345	0.058815	12.3168	0.518671	0.322701	0.064699	4.28593	0.382621		0	0.140583	99.5995	52.2836	29.5529	0.0590515	12.3663	0.520757	0.323999	0.0649591	4.30316	0.384159	0	0	0.141148	100
ODG-41A	10.58052/IEODG001F	298	outer rim	Pico Viejo C	PVC	EMPA	54.5023	28.008	0.052243	10.4976	0.395549	0.368052	0.073008	5.13952	0.539054		0	0.149396	99.7247	54.6527	28.0853	0.0523872	10.5266	0.396641	0.369068	0.0732095	5.15371	0.540542	0	0	0.149808	100
ODG-41A	10.58052/IEODG001F	299	outer rim	Pico Viejo C	PVC	EMPA	54.3252	27.5281	0.064478	10.2308	0.410936	0.333464	0.095595	5.32247	0.689545		0	0.139193	99.1398	54.7966	27.767	0.0650375	10.3196	0.414502	0.336357	0.0964245	5.36865	0.695528	0	0	0.140401	100
ODG-41A	10.58052/IEODG001F	300	outer rim	Pico Viejo C	PVC	EMPA	55.314	27.4533	0.062453	9.82228	0.418369	0.330253	0.101848	5.50018	0.671087		0	0.160567	99.8343	55.4058	27.4989	0.0625566	9.83858	0.419063	0.330801	0.102017	5.50931	0.672201	0	0	0.160833	100
ODG-41A	10.58052/IEODG001F	301	outer rim	Pico Viejo C	PVC	EMPA	55.1386	27.2545	0.060705	9.75305	0.383032	0.349971	0.094837	5.58912	0.700859		0	0.144131	99.4688	55.4331	27.4	0.0610292	9.80513	0.385078	0.35184	0.0953435	5.61897	0.704602	0	0	0.144901	100
ODG-41A	10.58052/IEODG001F	302	outer rim	Pico Viejo C	PVC	EMPA	54.7367	27.7774	0.076581	10.2414	0.418852	0.335086	0.084484	5.26174	0.631746		0	0.184259	99.7482	54.8748	27.8475	0.0767743	10.2672	0.419909	0.335932	0.0846972	5.27502	0.63334	0	0	0.184724	100
ODG-41A	10.58052/IEODG001F	303	outer rim	Pico Viejo C	PVC	EMPA	54.1456	28.5951	0.072485	11.0511	0.464261	0.348141	0.069794	4.90479	0.537074		0	0.156553	100.345	53.9595	28.4968	0.0722359	11.0131	0.462665	0.346944	0.0695541	4.88793	0.535228	0	0	0.156015	100
ODG-41A	10.58052/IEODG001F	304	outer rim	Pico Viejo C	PVC	EMPA	54.3671	28.1413	0.064756	10.7447	0.46267	0.283827	0.073183	5.18516	0.551849		0	0.158498	100.033	54.3491	28.132	0.0647346	10.7412	0.462517	0.283733	0.0731588	5.18345	0.551667	0	0	0.158446	100
ODG-41A	10.58052/IEODG001F	305	outer rim	Pico Viejo C	PVC	EMPA	54.2731	28.3033	0.064551	10.571	0.528571	0.303942	0.056838	5.10561	0.521691		0	0.169114	99.8977	54.3287	28.3323	0.0646171	10.5818	0.529112	0.304253	0.0568962	5.11084	0.522225	0	0	0.169287	100
ODG-41A	10.58052/IEODG001F	306	outer rim	Pico Viejo C	PVC	EMPA	53.9245	27.9838	0.073629	10.6179	0.551669	0.309092	0.069454	5.04893	0.556636		0	0.164466	99.3001	54.3046	28.181	0.074148	10.6927	0.555557	0.311271	0.0699436	5.08452	0.560559	0	0	0.165625	100
ODG-41A	10.58052/IEODG001F	307	core	Pico Viejo C	PVC	EMPA	52.0105	29.5819	0.067587	12.3666	0.509506	0.323573	0.047799	4.2718	0.381312		0	0.121281	99.6819	52.1765	29.6763	0.0678027	12.4061	0.511132	0.324606	0.0479516	4.28543	0.382529	0	0	0.121668	100
ODG-41A	10.58052/IEODG001F	308	outer rim	Pico Viejo C	PVC	EMPA	55.4146	27.1617	0.061518	9.60896	0.419023	0.360704	0.100331	5.56045	0.687505		0	0.146109	99.5209	55.6814	27.2925	0.0618142	9.65522	0.42104	0.36244	0.100814	5.58722	0.690815	0	0	0.146812	100
ODG-41A	10.58052/IEODG001F	310	feld micro	Pico Viejo C	PVC	EMPA	54.4985	27.9278	0.071777	10.4542	0.511796	0.339959	0.066863	5.14882	0.568591		0	0.17636	99.7647	54.6271	27.9937	0.0719463	10.4789	0.513003	0.340761	0.0670207	5.16097	0.569932	0	0	0.176776	100
ODG-41A	10.58052/IEODG001F	311	feld micro	Pico Viejo C	PVC	EMPA	54.0783	28.278	0.064491	10.844	0.463187	0.308397	0.075536	4.99812	0.530799		0	0.182724	99.8236	54.1739	28.328	0.064605	10.8632	0.464006	0.308942	0.0756695	5.00695	0.531737	0	0	0.183047	100
ODG-41A	10.58052/IEODG001F	312	core	Pico Viejo C	PVC	EMPA	53.7855	28.1563	0.087642	10.9622	0.508456	0.303566	0.060517	4.91621	0.516862		0	0.126721	99.424	54.0971	28.3194	0.0881498	11.0257	0.511402	0.305325	0.0608676	4.94469	0.519857	0	0	0.127455	100
ODG-41A	10.58052/IEODG001F	313	core	Pico Viejo C	PVC	EMPA	50.9075	30.61	0.078692	13.4374	0.46476	0.305334	0.040308	3.61285	0.292432		0	0.118726	99.868	50.9748	30.6505	0.078796	13.4552	0.465374	0.305738	0.0403613	3.61763	0.292819	0	0	0.118883	100
ODG-41A	10.58052/IEODG001F	314	core	Pico Viejo C	PVC	EMPA	52.06	30.0867	0.078904	12.763	0.524653	0.326067	0.041706	4.06492	0.342838		0.02901	0.138785	100.457	51.8234	29.95	0.0785454	12.705	0.522268	0.324585	0.0415164	4.04644	0.34128	0	0.0288781	0.138154	100
ODG-41A	10.58052/IEODG001F	315	core	Pico Viejo C	PVC	EMPA	52.3363	29.4811	0.071018	12.3669	0.419602	0.322757	0.042775	4.19545	0.361937		0	0.138568	99.7364	52.4746	29.559	0.0712057	12.3996	0.420711	0.32361	0.042888	4.20654	0.362894	0	0	0.138934	100
ODG-41A	10.58052/IEODG001F	316	outer rim	Pico Viejo C	PVC	EMPA	54.1049	28.1853	0.079625	10.6774	0.399899	0.278372	0.074368	5.12645	0.571206		0	0.147653	99.6452	54.2976	28.2857	0.0799085	10.7154	0.401323	0.279363	0.0746328	5.1447	0.57324	0	0	0.148179	100
ODG-41A	10.58052/IEODG001F	317	outer rim	Pico Viejo C	PVC	EMPA	54.5091	28.2483	0.068417	10.6408	0.399773	0.322768	0.072318	5.11852	0.546409		0	0.168006	100.094	54.4577	28.2217	0.0683525	10.6308	0.399396	0.322464	0.0722498	5.11369	0.545894	0	0	0.167848	100
ODG-41A	10.58052/IEODG001F	318	core	Pico Viejo C	PVC	EMPA	52.5917	29.2301	0.075405	12.0239	0.538752	0.329005	0.05266	4.41969	0.384684		0	0.14914	99.795	52.6997	29.2901	0.0755599	12.0486	0.539859	0.329681	0.0527682	4.42877	0.385474	0	0	0.149446	100
ODG-41A	10.58052/IEODG001F	319	core	Pico Viejo C	PVC	EMPA	52.8062	29.2125	0.062456	11.925	0.513625	0.308606	0.053625	4.40949	0.384834		0	0.137409	99.8137	52.9047	29.267	0.0625725	11.9473	0.514583	0.309182	0.0537251	4.41772	0.385552	0	0	0.137665	100
ODG-41A	10.58052/IEODG001F	320	core	Pico Viejo C	PVC	EMPA	53.0213	28.6756	0.066016	11.6789	0.555868	0.329465	0.06591	4.71179	0.41423		0	0.140022	99.6591	53.2027	28.7737	0.0662418	11.7188	0.557769	0.330592	0.0661355	4.72791	0.415647	0	0	0.140501	100
ODG-41A	10.58052/IEODG001F	321	outer rim	Pico Viejo C	PVC	EMPA	55.6785	27.2254	0.045956	9.57434	0.385884	0.3404	0.092281	5.57859	0.658571		0	0.169448	99.7494	55.8184	27.2938	0.0460715	9.5984	0.386854	0.341255	0.0925129	5.59261	0.660226	0	0	0.169874	100
ODG-41A	10.58052/IEODG001F	322	outer rim	Pico Viejo C	PVC	EMPA	55.5615	27.2608	0.038781	9.48472	0.431972	0.344846	0.08869	5.64349	0.662865		0	0.155734	99.6734	55.7436	27.3501	0.0389081	9.5158	0.433387	0.345976	0.0889806	5.66198	0.665037	0	0	0.156244	100
ODG-41A	10.58052/IEODG001F	323	outer rim	Pico Viejo C	PVC	EMPA	56.0296	27.1854	0.049661	9.46383	0.420828	0.321127	0.105133	5.66014	0.69986		0	0.164387	100.1	55.9736	27.1583	0.0496114	9.45438	0.420408	0.320806	0.105028	5.65449	0.699161	0	0	0.164223	100
ODG-41A	10.58052/IEODG001F	324	outer rim	Pico Viejo C	PVC	EMPA	54.2999	28.2386	0.05983	10.7219	0.387933	0.303037	0.064888	5.07079	0.539124		0	0.170541	99.8565	54.3779	28.2792	0.059916	10.7373	0.38849	0.303472	0.0649812	5.07807	0.539899	0	0	0.170786	100
ODG-41A	10.58052/IEODG001F	325	outer rim	Pico Viejo C	PVC	EMPA	54.8288	26.7981	0.139465	9.57859	0.833702	0.311092	0.116111	5.38242	0.704811		0	0.497344	99.1904	55.2763	27.0168	0.140603	9.65677	0.840506	0.313631	0.117059	5.42635	0.710563	0	0	0.501403	100
ODG-41A	10.58052/IEODG001F	326	core	Pico Viejo C	PVC	EMPA	52.8509	29.0948	0.073649	11.8661	0.510636	0.286997	0.050445	4.43268	0.389741		0	0.129507	99.6855	53.0177	29.1866	0.0738814	11.9035	0.512247	0.287903	0.0506042	4.44667	0.390971	0	0	0.129916	100
ODG-41A	10.58052/IEODG001F	327	core	Pico Viejo C	PVC	EMPA	53.6492	28.313	0.082732	11.0058	0.452923	0.293793	0.058488	4.9801	0.471031		0	0.14202	99.4491	53.9464	28.4698	0.0831903	11.0668	0.455432	0.295421	0.058812	5.00769	0.47364	0	0	0.142807	100
ODG-41A	10.58052/IEODG001F	328	core	Pico Viejo C	PVC	EMPA	50.7049	30.6924	0.084382	13.5612	0.524454	0.292955	0.037381	3.54862	0.281249		0	0.099191	99.8267	50.7929	30.7457	0.0845285	13.5847	0.525364	0.293463	0.0374459	3.55478	0.281737	0	0	0.0993632	100
ODG-41A	10.58052/IEODG001F	329	outer rim	Pico Viejo C	PVC	EMPA	53.9733	28.0817	0.074677	10.6338	0.43056	0.290822	0.081651	5.0721	0.583901		0	0.154777	99.3773	54.3115	28.2577	0.0751449	10.7004	0.433258	0.292644	0.0821626	5.10388	0.58756	0	0	0.155747	100
ODG-41A	10.58052/IEODG001F	330	outer rim	Pico Viejo C	PVC	EMPA	54.1214	28.0512	0.066153	10.6541	0.531682	0.338873	0.058905	5.11426	0.582713		0	0.182501	99.7018	54.2833	28.1351	0.0663509	10.686	0.533272	0.339887	0.0590812	5.12956	0.584456	0	0	0.183047	100
ODG-41A	10.58052/IEODG001F	331	core	Pico Viejo C	PVC	EMPA	50.8646	30.2232	0.074041	13.2131	0.525149	0.28934	0.032041	3.72231	0.320268		0.025682	0.115349	99.4051	51.169	30.4041	0.0744841	13.2922	0.528292	0.291072	0.0322328	3.74459	0.322185	0	0.0258357	0.116039	100
ODG-41A	10.58052/IEODG001F	332	outer rim	Pico Viejo C	PVC	EMPA	54.6408	27.8339	0.063918	10.5186	0.40831	0.288678	0.066371	5.11706	0.566526		0	0.166691	99.6709	54.8212	27.9258	0.0641291	10.5533	0.409658	0.289631	0.0665902	5.13396	0.568397	0	0	0.167241	100
ODG-41A	10.58052/IEODG001F	333	core	Pico Viejo C	PVC	EMPA	50.9111	30.3079	0.076627	13.4074	0.538641	0.330495	0.033581	3.73152	0.301953		0	0.110625	99.7498	51.0388	30.3839	0.0768192	13.441	0.539992	0.331324	0.0336652	3.74088	0.30271	0	0	0.110902	100
ODG-41A	10.58052/IEODG001F	334	outer rim	Pico Viejo C	PVC	EMPA	54.3149	28.1593	0.059936	10.6262	0.40192	0.305585	0.088945	5.05518	0.573943		0	0.166465	99.7524	54.4497	28.2292	0.0600848	10.6526	0.402918	0.306344	0.0891658	5.06773	0.575368	0	0	0.166878	100
ODG-41A	10.58052/IEODG001F	335	feld micro	Pico Viejo C	PVC	EMPA	54.2958	28.163	0.068273	10.6884	0.52186	0.331717	0.059301	5.13378	0.57072		0	0.168516	100.001	54.2951	28.1626	0.0682721	10.6883	0.521853	0.331712	0.0593002	5.13371	0.570712	0	0	0.168514	100
ODG-41A	10.58052/IEODG001F	336	feld micro	Pico Viejo C	PVC	EMPA	54.249	28.1833	0.066523	10.6851	0.565753	0.328093	0.081884	5.07376	0.587851		0	0.185558	100.007	54.2453	28.1814	0.0665185	10.6844	0.565714	0.328071	0.0818784	5.07341	0.587811	0	0	0.185545	100
ODG-41A	10.58052/IEODG001F	337	core	Pico Viejo C	PVC	EMPA	52.0313	29.3876	0.070539	12.4327	0.528673	0.318976	0.046837	4.15204	0.388765		0	0.129248	99.4867	52.2998	29.5392	0.070903	12.4968	0.531401	0.320622	0.0470787	4.17346	0.390771	0	0	0.129915	100
ODG-41A	10.58052/IEODG001F	338	core	Pico Viejo C	PVC	EMPA	49.4441	31.5432	0.073177	14.7468	0.53714	0.333617	0	2.98465	0.218864		0	0.094252	99.9758	49.4561	31.5508	0.0731947	14.7504	0.53727	0.333698	0	2.98537	0.218917	0	0	0.0942748	100
ODG-41A	10.58052/IEODG001F	339	core	Pico Viejo C	PVC	EMPA	50.1581	31.1206	0.082391	14.1455	0.568537	0.321297	0.031594	3.36408	0.237871		0	0.099498	100.129	50.0932	31.0804	0.0822845	14.1272	0.567802	0.320882	0.0315531	3.35973	0.237563	0	0	0.0993693	100
ODG-41A	10.58052/IEODG001F	340	core	Pico Viejo C	PVC	EMPA	49.0427	31.7765	0.076333	14.9474	0.552933	0.319179	0.023124	2.82414	0.182462		0	0.096932	99.8417	49.1205	31.8269	0.076454	14.9711	0.55381	0.319685	0.0231607	2.82862	0.182751	0	0	0.0970857	100
ODG-41A	10.58052/IEODG001F	341	core	Pico Viejo C	PVC	EMPA	51.75	29.9983	0.075344	12.8744	0.481264	0.306746	0.034207	3.99276	0.360324		0	0.12961	100.003	51.7485	29.9974	0.0753418	12.874	0.48125	0.306737	0.034206	3.99264	0.360313	0	0	0.129606	100
ODG-41A	10.58052/IEODG001F	342	outer rim	Pico Viejo C	PVC	EMPA	53.9213	28.2817	0.074039	10.9303	0.420138	0.317644	0.080294	4.92424	0.532541		0	0.155483	99.6377	54.1174	28.3845	0.0743082	10.97	0.421666	0.318799	0.080586	4.94215	0.534478	0	0	0.156048	100
ODG-41A	10.58052/IEODG001F	343	outer rim	Pico Viejo C	PVC	EMPA	53.966	28.3371	0.065677	10.7832	0.429139	0.337705	0.07758	5.04721	0.537439		0	0.162424	99.7435	54.1048	28.41	0.0658459	10.8109	0.430243	0.338574	0.0777795	5.06019	0.538821	0	0	0.162842	100
ODG-41A	10.58052/IEODG001F	344	outer rim	Pico Viejo C	PVC	EMPA	53.5121	28.3137	0.068388	11.0435	0.431881	0.328758	0.064238	4.97103	0.513504		0	0.160842	99.4079	53.8308	28.4823	0.0687953	11.1093	0.434453	0.330716	0.0646206	5.00064	0.516562	0	0	0.1618	100
ODG-41A	10.58052/IEODG001F	346	core	Pico Viejo C	PVC	EMPA	53.8183	28.5978	0.073628	11.249	0.457993	0.339962	0.066946	4.8415	0.439065		0	0.153894	100.038	53.7978	28.5869	0.0736	11.2447	0.457819	0.339833	0.0669205	4.83966	0.438898	0	0	0.153835	100
ODG-41A	10.58052/IEODG001F	347	core	Pico Viejo C	PVC	EMPA	53.8482	28.5406	0.093501	11.1556	0.474197	0.316561	0.057975	4.96488	0.447792		0	0.155257	100.055	53.8188	28.525	0.09345	11.1495	0.473938	0.316388	0.0579434	4.96217	0.447548	0	0	0.155172	100
ODG-41A	10.58052/IEODG001F	348	core	Pico Viejo C	PVC	EMPA	52.5754	29.2873	0.094734	12.1072	0.566479	0.337387	0.049238	4.34163	0.374921		0	0.132429	99.8667	52.6456	29.3264	0.0948604	12.1234	0.567235	0.337837	0.0493037	4.34742	0.375421	0	0	0.132606	100
ODG-41A	10.58052/IEODG001F	349	core	Pico Viejo C	PVC	EMPA	52.1658	29.7095	0.077095	12.3581	0.525337	0.321065	0.038449	4.14029	0.358784		0	0.13144	99.8259	52.2568	29.7613	0.0772295	12.3797	0.526253	0.321625	0.0385161	4.14751	0.35941	0	0	0.131669	100
ODG-41A	10.58052/IEODG001F	350	core	Pico Viejo C	PVC	EMPA	50.2235	30.506	0.072681	13.7408	0.547996	0.313176	0.035183	3.45889	0.288913		0	0.096851	99.284	50.5857	30.726	0.0732052	13.8399	0.551948	0.315435	0.0354367	3.48383	0.290997	0	0	0.0975495	100
ODG-41A	10.58052/IEODG001F	351	outer rim	Pico Viejo C	PVC	EMPA	54.3027	28.166	0.070573	10.5937	0.428101	0.286491	0.072751	5.1553	0.505478		0	0.16294	99.744	54.4421	28.2383	0.0707541	10.6209	0.4292	0.287226	0.0729377	5.16853	0.506775	0	0	0.163358	100
ODG-41A	10.58052/IEODG001F	352	outer rim	Pico Viejo C	PVC	EMPA	54.5584	27.9391	0.064258	10.4699	0.384882	0.331989	0.086459	5.20738	0.593296		0	0.165299	99.801	54.6672	27.9948	0.0643862	10.4908	0.38565	0.332651	0.0866314	5.21777	0.594479	0	0	0.165629	100
ODG-41A	10.58052/IEODG001F	353	outer rim	Pico Viejo C	PVC	EMPA	54.6608	27.9005	0.064371	10.3261	0.515185	0.324102	0.078704	5.23621	0.621788		0	0.172333	99.9001	54.7155	27.9284	0.0644354	10.3364	0.5157	0.324426	0.0787827	5.24145	0.62241	0	0	0.172505	100
ODG-41A	10.58052/IEODG001F	354	core	Pico Viejo C	PVC	EMPA	52.6134	29.2919	0.080263	12.0586	0.53013	0.316448	0.056962	4.38446	0.352798		0	0.131114	99.8161	52.7103	29.3459	0.0804109	12.0808	0.531107	0.317031	0.057067	4.39254	0.353448	0	0	0.131356	100
ODG-41A	10.58052/IEODG001F	355	core	Pico Viejo C	PVC	EMPA	51.168	30.329	0.080757	13.1541	0.549677	0.299403	0.028558	3.65173	0.274143		0	0.114018	99.6494	51.348	30.4357	0.0810411	13.2004	0.551611	0.300456	0.0286585	3.66458	0.275108	0	0	0.114419	100
ODG-41A	10.58052/IEODG001F	356	outer rim	Pico Viejo C	PVC	EMPA	57.2011	25.7037	0.125693	8.21596	0.701318	0.294813	0.150407	6.19376	0.916908		0	0.292626	99.7963	57.3179	25.7562	0.12595	8.23273	0.70275	0.295415	0.150714	6.2064	0.91878	0	0	0.293223	100
ODG-41A	10.58052/IEODG001F	357	outer rim	Pico Viejo C	PVC	EMPA	54.3558	27.9572	0.064044	10.4217	0.376855	0.365723	0.072023	5.13593	0.571293		0	0.168261	99.4888	54.6351	28.1008	0.0643731	10.4752	0.378791	0.367602	0.0723931	5.16232	0.574228	0	0	0.169126	100
ODG-41A	10.58052/IEODG001F	358	outer rim	Pico Viejo C	PVC	EMPA	54.3486	28.0342	0.069337	10.6945	0.537855	0.312242	0.089399	5.07647	0.575534		0	0.187991	99.9261	54.3888	28.0549	0.0693883	10.7024	0.538253	0.312473	0.0894651	5.08022	0.575959	0	0	0.18813	100
ODG-41A	10.58052/IEODG001F	359	feld micro	Pico Viejo C	PVC	EMPA	56.3147	26.8235	0.061057	9.13731	0.417603	0.346948	0.150652	5.72139	0.768883		0	0.173878	99.9159	56.3621	26.8461	0.0611084	9.145	0.417954	0.34724	0.150779	5.7262	0.76953	0	0	0.174024	100
ODG-41A	10.58052/IEODG001F	360	feld micro	Pico Viejo C	PVC	EMPA	54.7818	27.8756	0.065624	10.1352	0.428283	0.316349	0.071738	5.32034	0.637389		0	0.177512	99.8098	54.8862	27.9287	0.065749	10.1545	0.429099	0.316952	0.0718747	5.33048	0.638603	0	0	0.17785	100
ODG-41A	10.58052/IEODG001F	361	feld micro	Pico Viejo C	PVC	EMPA	54.4651	28.1522	0.073348	10.5995	0.527052	0.301675	0.066033	5.09062	0.577349		0	0.185183	100.038	54.4444	28.1415	0.0733201	10.5955	0.526851	0.30156	0.0660079	5.08868	0.577129	0	0	0.185113	100
ODG-4A	10.58052/IEODG000B	1	core	Montaña Blanca	lmb	LA-ICP-MS																											1211.42	0.908104	0.248998	0.278074	1.96433	1.88668	0.0699387	0.107728	0.000850078	0.786546	0.0314265	0.00294231	0.00570751	0.00673182	0.00812338	0	0.00373472
ODG-4A	10.58052/IEODG000B	2	outer rim	Montaña Blanca	lmb	LA-ICP-MS																											0	1.39179	0	0.28446	2.18942	2.11102	0.0759834	0.202034	0.0124183	0.757359	0.0319596	0.00364352	0.00574682	0.00193263	0.00310647	2.57134e-05	0.00334257
ODG-4A	10.58052/IEODG000B	5	core	Montaña Blanca	lmb	LA-ICP-MS																											898.106	0.322095	0.228535	0.31163	2.15976	1.81371	0.0718545	0.182804	0.00875137	0.875179	0.0142648	0.00218436	0.00170578	0	0.0013291	0.00120193	0.00292938
ODG-4A	10.58052/IEODG000B	6	outer rim	Montaña Blanca	lmb	LA-ICP-MS																											200.185	0.385433	0	0.315885	4.37308	5.2835	0.369622	1.03172	0.159108	0.855603	0.16998	0.0216916	0.126152	0.0255241	0.0655051	0.00971014	0.0845501
ODG-37A	10.58052/IEODG001B	7	core	Arenas Blancas	ab	LA-ICP-MS																											450.287	0.21103	3.66586	0.695783	9.96552	10.9839	0.515574	1.00954	0.109155	1.87568	0.0714195	0.00293103	0.0236363	0.00291726	0.00945234	0.00162449	0.0212608
ODG-37A	10.58052/IEODG001B	8	core	Arenas Blancas	ab	LA-ICP-MS																											446.989	0.313462	0.450521	0.447045	6.69118	8.05379	0.340108	0.626123	0.0456571	1.37989	0.031708	0	0	0.00253372	0.00328514	0.0011406	0.00649818
ODG-37A	10.58052/IEODG001B	10	core	Arenas Blancas	ab	LA-ICP-MS																											878.986	0.262218	5.68883	1.16433	9.5787	9.55158	0.494952	1.28943	0	1.88341	0.0921384	0.0202309	0.0813975	0	0.0311882	0	0.0406822
ODG-37A	10.58052/IEODG001B	12	core	Arenas Blancas	ab	LA-ICP-MS																											132.826	0.535192	3.65327	0.506644	9.40941	9.12528	0.453304	0.629147	0.0600185	1.72433	0.0229419	0	0.0392726	0	0.0190903	0	0.0269316
ODG-37A	10.58052/IEODG001B	14	core	Arenas Blancas	ab	LA-ICP-MS																											286.207	0.348786	2.74757	0.317319	5.13954	5.65513	0.213821	0.343648	0.018973	1.10485	0.00625226	0.00200443	0.00128394	0.00297377	0.00251769	0	0
ODG-37A	10.58052/IEODG001B	15	core	Arenas Blancas	ab	LA-ICP-MS																											345.566	0.230563	3.80399	0.175808	5.29709	5.64097	0.199433	0.436057	0.0498351	1.37834	0.0181365	0	0.0167617	0.0023777	0	0	0
ODG-37A	10.58052/IEODG001B	16	outer rim	Arenas Blancas	ab	LA-ICP-MS																											354.886	0.351318	5.12997	1.31908	4.36942	5.25203	0.245898	0.586006	0.0771456	1.10744	0.0766284	0.0124871	0.0653231	0.0113029	0.0257739	0.000108442	0
ODG-37A	10.58052/IEODG001B	17	core	Arenas Blancas	ab	LA-ICP-MS																											412.977	0.169004	1.45747	1.29226	10.0386	10.594	0.581085	1.33496	0.0823246	2.04889	0.146011	0.0127216	0.089971	0.0226972	0.0290028	0.00531958	0.0318567
ODG-37A	10.58052/IEODG001B	18	core	Arenas Blancas	ab	LA-ICP-MS																											216.433	0.347838	2.18787	0.324434	7.28729	7.69362	0.327582	0.754097	0.082751	1.63425	0.0423496	0.00853865	0.0184298	0.00545389	0.0226537	0.0034944	0.0189152
ODG-37A	10.58052/IEODG001B	19	outer rim	Arenas Blancas	ab	LA-ICP-MS																											224.67	0.141161	1.47674	0.341733	6.23738	6.2059	0.253928	0.445261	0.0577538	1.33068	0.0305815	0.00328719	0	0.0023561	0	0	0.0290554
ODG-39A	10.58052/IEODG001D	20	core	Teide J2	TJ2	LA-ICP-MS																											243.157	0.456307	0.545254	0.233149	5.56251	4.66691	0.219354	0.40007	0.0483776	1.49575	0.0150257	0.00166479	0.00727611	0.000916516	0.00486279	0.00150524	0.0108057
ODG-39A	10.58052/IEODG001D	21	outer rim	Teide J2	TJ2	LA-ICP-MS																											257.623	0.435121	0.811098	0.231424	5.7805	4.66889	0.213469	0.366543	0.0183843	1.57226	0.0256244	0.00251839	0.00990494	0.00185138	0.00551135	0.000818278	0.000104525
ODG-39A	10.58052/IEODG001D	22	feld_micro	Teide J2	TJ2	LA-ICP-MS																											182.512	0.46298	0.584978	0.253403	8.24943	8.67089	0.562246	1.40372	0.176003	1.64905	0.161573	0.0195673	0.129453	0.0312767	0.0602387	0.00857195	0.0789534
ODG-39A	10.58052/IEODG001D	23	core	Teide J2	TJ2	LA-ICP-MS																											266.712	0.58059	0.297097	0.153141	8.09509	9.10211	0.602309	2.00351	0.196568	1.54722	0.185729	0.0198081	0.115516	0.021772	0.0462866	0.0126859	0.0243137
ODG-39A	10.58052/IEODG001D	25	core	Teide J2	TJ2	LA-ICP-MS																											253.615	0.40981	0.148905	0.251931	6.48569	7.37417	0.45659	0.991869	0.0731412	1.3618	0.0932645	0.0115521	0.0150163	0.00558462	0.0130369	0.00410228	0.0220022
ODG-39A	10.58052/IEODG001D	27	core	Teide J2	TJ2	LA-ICP-MS																											213.967	0.746357	1.3447	0.124142	5.93789	5.27661	0.225237	0.639401	0.0784383	1.5339	0.0408053	0.00552751	0.0275406	0.00392601	0.0177218	0	0
ODG-39A	10.58052/IEODG001D	28	core	Teide J2	TJ2	LA-ICP-MS																											169.029	0.6209	0.747074	0.19166	13.4797	20.1847	1.9114	7.4248	1.07859	1.51922	0.678702	0.0784128	0.416282	0.0764817	0.111963	0.0142978	0.0589933
ODG-39A	10.58052/IEODG001D	29	outer rim	Teide J2	TJ2	LA-ICP-MS																											164.276	0.471859	0.982444	0.154458	4.39074	3.73868	0.152532	0.333609	0.0573702	1.3147	0.0388382	0.00213727	0	0.00428587	0.00370727	0.000826474	0
ODG-39A	10.58052/IEODG001D	30	core	Teide J2	TJ2	LA-ICP-MS																											139.554	0.363974	0.702347	0.150434	9.4428	10.4374	0.680594	1.86694	0.208532	1.66272	0.204783	0.0270096	0.140969	0.0220208	0.0654099	0.0129183	0.0666688
ODG-39A	10.58052/IEODG001D	31	core	Teide J2	TJ2	LA-ICP-MS																											116.563	0.35987	0.474763	0.14551	3.58056	3.3193	0.121839	0.235658	0.0184189	1.14201	0.0181183	0.000897227	4.6835e-05	0	0.00243667	0.00111247	0.00508877
ODG-39A	10.58052/IEODG001D	32	outer rim	Teide J2	TJ2	LA-ICP-MS																											168.971	0.577837	1.13135	0.1676	4.48733	4.17304	0.186278	0.352411	0.0237092	1.25069	0.000681398	5.35905e-05	0.00196804	3.66892e-05	0.00518039	4.36203e-05	0.00824874
ODG-13A	10.58052/IEODG000K	33	core	Teide L	TL	LA-ICP-MS																											154.756	0.53173	4.23453	0.901964	7.79026	8.26644	0.395269	0.722435	0.0588498	1.76594	0.0616468	0.00883531	0.0171826	0.00873305	0.0123358	0.00194256	0.0226872
ODG-13A	10.58052/IEODG000K	34	core	Teide L	TL	LA-ICP-MS																											110.224	0.466913	1.03494	0.82601	6.67034	6.95487	0.327957	0.596375	0.0508541	1.52873	0.0323303	0.000590591	0.0158554	0.00360639	0	0.001513	0.0114388
ODG-13A	10.58052/IEODG000K	35	core	Teide L	TL	LA-ICP-MS																											134.269	0.384774	1.44033	0.488778	6.10693	6.24599	0.279058	0.517153	0.00963996	1.37367	0.034556	0.000859028	0.00458741	0.00143239	0.00542193	0.00195612	0
ODG-13A	10.58052/IEODG000K	37	core	Teide L	TL	LA-ICP-MS																											66.8728	0.028456	3.16259	0.0869533	4.57842	5.26307	0.240282	0.64038	0.013668	1.26441	0.0542148	0.00492936	0.0360252	0.00836298	0.00779876	0.00423187	0.016541
ODG-13A	10.58052/IEODG000K	39	outer rim	Teide L	TL	LA-ICP-MS																											127.135	0.399658	5.60855	0.7894	5.70114	6.48139	0.29841	0.648873	0.0889999	1.28012	0.0589258	0.0056191	0.0226192	0.0022694	0.0125915	0.00241763	0.033252
ODG-13A	10.58052/IEODG000K	40	core	Teide L	TL	LA-ICP-MS																											160.868	0.301742	2.23702	0.707241	7.33644	8.27643	0.416986	1.02651	0.105485	2.03117	0.0910962	0.0136816	0.0428899	0.00219486	0.0066377	0.000838351	0.00812494
ODG-13A	10.58052/IEODG000K	42	core	Teide L	TL	LA-ICP-MS																											143.177	0.279876	1.86517	0.427825	7.26552	7.65809	0.352144	0.677712	0.0472384	2.23304	0.0325397	0	0.00851384	0.0018093	0	0.00248185	0.00801341
ODG-13A	10.58052/IEODG000K	43	outer rim	Teide L	TL	LA-ICP-MS																											158.981	0.258456	3.51941	3.33865	6.07216	6.4571	0.301758	0.562156	0.0703799	1.24952	0.0318047	0.0047679	0.0173777	0.0032993	0.00908653	0.000514394	0.00902577
ODG-13A	10.58052/IEODG000K	45	outer rim	Teide L	TL	LA-ICP-MS																											148.589	0.200579	1.43986	0.878999	13.1801	17.339	1.41557	4.13665	0.629095	1.5221	0.544021	0.0671085	0.425129	0.0832066	0.277119	0.0373678	0.268561
ODG-13A	10.58052/IEODG000K	46	core	Teide L	TL	LA-ICP-MS																											239.086	0.276987	1.08102	1.01601	8.28259	7.30357	0.369476	0.733876	0.034427	1.83702	0.0611966	0.000168152	0.00571906	0	0.00749794	0.000339422	0
ODG-18A	10.58052/IEODG000P	49	core	Pico Viejo H	PVH	LA-ICP-MS																											158.377	0.289161	4.80191	5.62334	8.98568	15.5071	0.99135	2.70078	0.312124	0.964554	0.207735	0.0243816	0.0816756	0.0119076	0.0392006	0.00456964	0.0458148
ODG-18A	10.58052/IEODG000P	52	core	Pico Viejo H	PVH	LA-ICP-MS																											117.945	0.478567	2.64751	1.5404	4.23822	8.26265	0.642769	1.80626	0.292004	0.920603	0.104021	0.0103511	0.0340747	0.00210504	0.0176005	0.000198992	0.0182971
ODG-18A	10.58052/IEODG000P	53	core	Pico Viejo H	PVH	LA-ICP-MS																											136.376	0.443572	4.15281	8.18385	8.81635	18.6914	1.52896	5.54223	0.908951	1.1649	0.551078	0.0702644	0.354416	0.0871697	0.159948	0.0257452	0.121669
ODG-18A	10.58052/IEODG000P	54	outer rim	Pico Viejo H	PVH	LA-ICP-MS																											204.21	0.322228	4.65494	1.73213	4.68519	8.81297	0.663938	1.94052	0.211384	1.1268	0.104795	0.0113482	0.0205476	0.00443565	0.0101684	0.00191354	0.0185888
ODG-18A	10.58052/IEODG000P	55	core	Pico Viejo H	PVH	LA-ICP-MS																											146.684	0.288345	1.65502	7.12119	6.70297	13.772	0.847261	2.50233	0.252059	1.15634	0.171114	0.0223514	0.11762	0.0186294	0.0572007	0.00832738	0.0507666
ODG-18A	10.58052/IEODG000P	56	core	Pico Viejo H	PVH	LA-ICP-MS																											142.253	0.335724	2.09394	3.00496	8.65855	14.641	0.905512	2.43753	0.229239	1.09163	0.14453	0.0154909	0.0343633	0.0084895	0.0205686	0.00302162	0.022474
ODG-18A	10.58052/IEODG000P	59	core	Pico Viejo H	PVH	LA-ICP-MS																											174.711	0.209166	1.92832	2.18478	6.31113	15.9531	0.952586	2.83363	0.402367	1.1049	0.245538	0.0259341	0.160882	0.024535	0.0607949	0.0081209	0.0869624
ODG-18A	10.58052/IEODG000P	60	core	Pico Viejo H	PVH	LA-ICP-MS																											150.025	0.289112	4.0858	1.21362	4.06806	7.99814	0.595693	1.66468	0.152107	0.934778	0.117386	0.00598348	0.0302944	0.0100567	0	0.00301448	0.0116172
ODG-18A	10.58052/IEODG000P	61	core	Pico Viejo H	PVH	LA-ICP-MS																											152.805	0.234264	2.69898	2.25727	5.33825	9.8559	0.631598	2.09427	0.156393	1.09118	0.143476	0.00986479	0.0519591	0.00934903	0.0207239	0.00552908	0.0131207
ODG-20B	10.58052/IEODG000S	63	core	Montaña Reventada	revIb	LA-ICP-MS																											150.344	0.192339	1.01882	0.773958	11.5946	13.5975	0.739847	1.62364	0.166608	1.23997	0.118757	0.0100634	0.0647067	0.0126748	0.0463124	0.00756583	0.0365663
ODG-20B	10.58052/IEODG000S	64	core	Montaña Reventada	revIb	LA-ICP-MS																											135.917	0.221615	0.691878	0.730804	13.8725	14.5033	0.77036	1.48156	0.0982607	1.19433	0.11919	0.0090415	0.0506228	0.0122303	0.0204691	0.00330065	0.0369872
ODG-20B	10.58052/IEODG000S	67	core	Montaña Reventada	revIb	LA-ICP-MS																											84.3449	0.940531	2.83092	2.75383	6.82127	7.90111	0.46206	1.06112	0.144941	1.99894	0.0980654	0.0149806	0.0656917	0.0165758	0.0304063	0.00299769	0.0236546
ODG-20B	10.58052/IEODG000S	69	outer rim	Montaña Reventada	revIb	LA-ICP-MS																											119.753	0.463624	4.01068	2.97638	8.90021	10.2747	0.5697	1.4259	0.14678	2.14471	0.0757125	0.0127158	0.0745895	0.0175048	0.0449483	0.00787644	0.0123633
ODG-20B	10.58052/IEODG000S	70	core	Montaña Reventada	revIb	LA-ICP-MS																											181.889	0.291155	0.6815	0.687951	7.64492	8.90355	0.39024	7.58442	0.0507045	2.30558	0.0432876	1.8131e-05	0.0100725	0	0	0.00148139	0
ODG-20B	10.58052/IEODG000S	71	core	Montaña Reventada	revIb	LA-ICP-MS																											142.539	0.315501	0.521578	1.03188	6.50827	7.35312	0.368926	0.893896	0.117839	1.85977	0.106593	0.0171047	0.0441204	0.00410147	0.0127787	0	0.00445077
ODG-20B	10.58052/IEODG000S	72	outer rim	Montaña Reventada	revIb	LA-ICP-MS																											203.252	0.396691	0.772205	9.31344	11.2189	19.0684	1.73391	4.02155	0.677956	1.47669	0.548527	0.0645023	0.350994	0.0637511	0.192804	0.0255735	0.134974
ODG-20B	10.58052/IEODG000S	73	core	Montaña Reventada	revIb	LA-ICP-MS																											141.859	0.330985	2.44156	1.15992	11.832	15.4533	0.818246	1.85837	0.155508	1.14033	0.145697	0.00698598	0.0509322	0.00647414	0.0248193	0.00304644	0.0249566
ODG-20B	10.58052/IEODG000S	74	outer rim	Montaña Reventada	revIb	LA-ICP-MS																											140.566	0.395974	1.79684	2.15253	13.3018	17.055	1.07554	2.70694	0.315804	1.55445	0.227018	0.0287402	0.119547	0.018626	0.0749114	0.0104173	0.0441062
ODG-41A	10.58052/IEODG001F	76	core	Pico Viejo C	PVC	LA-ICP-MS																											101.556	0.358851	0.592899	3.01376	5.94813	12.2808	1.10226	3.55959	0.557691	0.601664	0.365164	0.037847	0.29075	0.0378355	0.153067	0.0148135	0.0787068
ODG-41A	10.58052/IEODG001F	79	feld_micro	Pico Viejo C	PVC	LA-ICP-MS																											113.328	0.433708	0.763419	2.01132	8.09306	16.1702	1.40256	4.3317	0.669805	1.26063	0.536074	0.0676284	0.294535	0.0668606	0.149727	0.0246659	0.11024
ODG-41A	10.58052/IEODG001F	80	core	Pico Viejo C	PVC	LA-ICP-MS																											155.466	0.166405	0.59925	0.444641	4.39973	8.39172	0.592603	1.61709	0.200427	0.689685	0.0829941	0.0129815	0.0314867	0.0126886	0.0142587	0	0.0113871
ODG-41A	10.58052/IEODG001F	81	outer rim	Pico Viejo C	PVC	LA-ICP-MS																											99.5872	0.261844	0.460845	0.473754	6.32571	12.1285	0.889081	2.84314	0.275359	1.26768	0.221997	0.0136203	0.0596156	0.0171167	0.0525203	0.00471437	0.0195585
ODG-41A	10.58052/IEODG001F	82	core	Pico Viejo C	PVC	LA-ICP-MS																											103.288	0.176091	0.537641	0.84917	4.49577	9.36714	0.713514	2.29403	0.352217	0.973049	0.234968	0.0225501	0.139234	0.020752	0.0461813	0.0041538	0.0432615
ODG-41A	10.58052/IEODG001F	83	outer rim	Pico Viejo C	PVC	LA-ICP-MS																											117.726	0.22205	0.500728	0.636758	4.7277	9.35427	0.692125	1.91718	0.150147	0.9542	0.152479	0.0178816	0.0506594	0.010358	0.0302209	0.00589892	0.0225088
ODG-41A	10.58052/IEODG001F	85	core	Pico Viejo C	PVC	LA-ICP-MS																											143.861	0.152358	0.660468	2.11669	7.30221	13.109	1.12085	4.09912	0.64866	0.818029	0.43856	0.0496926	0.269038	0.0538513	0.129513	0.0192266	0.0745086
ODG-41A	10.58052/IEODG001F	88	core	Pico Viejo C	PVC	LA-ICP-MS																											30.9736	0	0	0.0784531	5.2356	8.29274	0.788805	2.33225	0	0.806448	0.758648	0.128664	0.153894	0	0	0.068809	0.216141
ODG-41A	10.58052/IEODG001F	89	core	Pico Viejo C	PVC	LA-ICP-MS																											61.9815	0	1.56863	1.23108	4.97285	9.04079	0.74612	2.27215	0.342877	0.671879	0.147901	0.00773416	0.126301	0.0155787	0	0.00575478	0.0310033
ODG-41A	10.58052/IEODG001F	91	feld_micro	Pico Viejo C	PVC	LA-ICP-MS																											84.0297	0.657649	0.585095	0.646773	6.63096	12.2245	0.846552	2.77666	0.411208	1.07211	0.285539	0.0179262	0	0.0164416	0.0409436	0.0104147	0.0966829
*Geological units after Ablay & Martí, 2000
[truncated: 26 more columns]
